# Supplementary material for: MAEL in human cancers and implications in prognostication and predicting benefit from immunotherapy over VEGFR/mTOR inhibitors in clear cell renal cell carcinoma: a bioinformatic analysis
Source: publisher site journal article supplement (doi:10.18632/aging.205470), 2024-01-31
Supplement: Supplementary file [file aging-v16i3-205470-supplementary-material-SD3.pdf]

## SUPPLEMENTARY TABLES

**Supplementary Table 1. Single cell transcriptomics datasets.**

| <b>Tissue</b>   | <b>Data source</b>   | <b>No. of<br/>M reads</b> | <b>No. of cells</b> | <b>Correlation with<br/>HPA bulk RNA</b> | <b>Reference</b>               |
|-----------------|----------------------|---------------------------|---------------------|------------------------------------------|--------------------------------|
| Colon           | GSE116222            | 12.9                      | 11167               | 0.811                                    | Parikh K et al. (2019)         |
| Eye             | GSE137537            | 22.6                      | 20091               |                                          | Menon M et al. (2019)          |
| Heart muscle    | GSE109816            | 396.7                     | 9182                | 0.797                                    | Wang L et al. (2020)           |
| Small intestine | GSE125970            | 59.6                      | 6167                |                                          | Wang Y et al. (2020)           |
| Kidney          | GSE131685            | 56.2                      | 25279               | 0.867                                    | Liao J et al. (2020)           |
| Liver           | GSE115469            | 42                        | 8439                | 0.837                                    | MacParland SA et al. (2018)    |
| Lung            | GSE130148            | 6.9                       | 4599                | 0.863                                    | Vieira Braga FA et al. (2019)  |
| Placenta        | E-MTAB-6701          | 347                       | 18547               | 0.879                                    | Vento-Tormo R et al. (2018)    |
| Prostate        | GSE117403            | 177.4                     | 35862               | 0.756                                    | Henry GH et al. (2018)         |
| Rectum          | GSE125970            | 60.4                      | 3898                | 0.756                                    | Wang Y et al. (2020)           |
| PBMC            | GSE112845            | 19.4                      | 4972                | 0.756                                    | Chen J et al. (2018)           |
| Testis          | GSE120508            | 70.5                      | 6490                | 0.756                                    | Guo J et al. (2018)            |
| Pancreas        | GSE131886            | 92.3                      | 3719                | 0.829                                    | Qadir MMF et al. (2020)        |
| Skin            | GSE130973            | 56.4                      | 15798               | 0.756                                    | Solé-Boldo L et al. (2020)     |
| Brain           |                      | 1357.2                    | 76533               | 0.661                                    | Allen brain map                |
| Bronchus        |                      | 85.3                      | 17521               |                                          | Lukassen S et al. (2020)       |
| Endometrium     | GSE111976            | 624.1                     | 71032               | 0.807                                    | Wang W et al. (2020)           |
| Skeletal muscle | GSE143704            | 77.8                      | 22030               | 0.697                                    | De Micheli AJ et al. (2020)    |
| Ovary           | GSE146512            | 259.2                     | 43636               | 0.808                                    | Man L et al. (2020)            |
| Adipose tissue  | GSE155960            | 418.5                     | 83536               | 0.813                                    | Hildreth AD et al. (2021)      |
| Esophagus       | 159929-GSM4850580    | 31.5                      | 9117                | 0.84                                     | He S et al. (2020)             |
| Lymph node      | GSE159929-GSM4850583 | 14.2                      | 7771                | 0.849                                    | He S et al. (2020)             |
| Bone marrow     | GSE159929-GSM4850584 | 8.6                       | 3230                | 0.818                                    | He S et al. (2020)             |
| Spleen          | GSE159929-GSM4850589 | 14.8                      | 4512                | 0.804                                    | He S et al. (2020)             |
| Stomach         | GSE159929-GSM4850590 | 18.9                      | 5318                | 0.814                                    | He S et al. (2020)             |
| Breast          | GSE164898            | 342.3                     | 47662               | 0.839                                    | Bhat-Nakshatri P et al. (2021) |

**Supplementary Table 2. Basic characteristics of the included dataset.**

|                                              | TCGA-KIRC                                                                   | ICGC-<br>PCAWG<br>RECA-EU | GDSC                                        | JAVELIN<br>Renal 101                       | CM-025                                      | E-MTAB-<br>3267      | GSE83820            | GSE36895            |
|----------------------------------------------|-----------------------------------------------------------------------------|---------------------------|---------------------------------------------|--------------------------------------------|---------------------------------------------|----------------------|---------------------|---------------------|
| Number of patients/cell lines with mRNA data | 522                                                                         | 64                        | 16                                          | 726                                        | 250                                         | 53                   | 5                   | 4                   |
| Data used in the present study               | Mutation, copy number variation, mRNA, lncRNA, clinicopathological data, OS | mRNA, OS                  | mRNA, IC50                                  | mRNA, PFS                                  | mRNA, PFS                                   | mRNA, PFS            | mRNA                | mRNA                |
| Sequencing method of transcriptomic          | RNA-seq                                                                     | RNA-seq                   | RNA-seq (Illumina HiSeq 2000 or HiSeq 2500) | RNA-seq (Illumina HiSeq 2500)              | RNA-seq (Illumina HiSeq 2000 or HiSeq 2500) | Microarray (GPL6244) | Microarray (GPL570) | Microarray (GPL570) |
| PD-L1 immunohistochemical staining           | NA                                                                          | NA                        | NA                                          | SP142, immune cell score                   | NA                                          | NA                   | NA                  | NA                  |
| Therapy                                      | NA                                                                          | NA                        | Targeted agents                             | Avelumab+Axitinib vs. Sunitinib (1st line) | Nivolumab vs. Everolimus (2nd-3rd line)     | Sunitinib (1st line) | NA                  | NA                  |

Abbreviations: ICGC-PCAWG RECA-EU, International Cancer Genome Consortium-Pan-cancer analysis of whole genomes Renal Cell Carcinoma-Europe; OS, overall survival; PFS, progression-free survival.
