# Supplementary material for: MAEL in human cancers and implications in prognostication and predicting benefit from immunotherapy over VEGFR/mTOR inhibitors in clear cell renal cell carcinoma: a bioinformatic analysis
Source: Aging (Albany NY). 2024 Jan 31;16(3):2090–122. doi: 10.18632/aging.205470 (PMC10911358; doi:10.18632/aging.205470)
Supplement: Supplementary Table 3 [file aging-16-205470-s004.xlsx]

## Sheet: Sheet1
Supplementary Table 3. MAEL expression in normal tissues.
Tissue	Nervous system	MAEL (TPM)	log2(TPM+1)
Testis	No	284.6	8.15785
Placenta	No	9.3	3.36457
Heart Muscle	No	3.6	2.20163
Perirhinal Gyrus	Yes	2.7	1.88753
Dorsomedial Nucleus	Yes	2.6	1.848
Angular Gyrus (White Matter)	Yes	2.5	1.80735
Inferior Temporal Gyrus	Yes	2.5	1.80735
Temporo-Occipital Transitional Zone	Yes	2.4	1.76553
Lingual Gyrus	Yes	2.2	1.67807
Middle Temporal Gyrus	Yes	2.2	1.67807
Pretectal Area	Yes	2.2	1.67807
Parahippocampal Cortex (White Matter)	Yes	2.1	1.63227
Septal Nuclei	Yes	2.1	1.63227
Supramarginal Gyrus	Yes	2.1	1.63227
Temporal Pole	Yes	2.1	1.63227
Ventromedial Nucleus	Yes	2.1	1.63227
Anterior Insular Cortex, Ventral	Yes	2	1.58496
Fusiform Gyrus	Yes	2	1.58496
Nucleus Of The Diagonal Band	Yes	2	1.58496
Parieto-Insular Cortex	Yes	2	1.58496
Periaquaductal Grey, Dorsal	Yes	2	1.58496
Posterior Insular Cortex	Yes	2	1.58496
Superior Temporal Gyrus	Yes	2	1.58496
Transversal Temporal Gyrus, Anterior	Yes	2	1.58496
Angular Gyrus	Yes	1.9	1.53605
Habenula	Yes	1.9	1.53605
Stria Terminalis, Bed Nucleus	Yes	1.9	1.53605
Olfactory Tubercle	Yes	1.8	1.48543
Superior Colliculus	Yes	1.8	1.48543
Transversal Temporal Gyrus, Posterior	Yes	1.8	1.48543
Ventral Thalamic Nuclei	Yes	1.7	1.43296
Anterior Insular Cortex, Dorsal	Yes	1.6	1.37851
Epididymis	No	1.6	1.37851
Frontopolar Cortex	Yes	1.6	1.37851
Hippocampus, Ca1	Yes	1.6	1.37851
Inferior Colliculus	Yes	1.6	1.37851
Inferior Frontal Gyrus, Triangular	Yes	1.6	1.37851
Kidney	No	1.6	1.37851
Medial Dorsal Thalamic Nucleus	Yes	1.6	1.37851
Olfactory Area	Yes	1.6	1.37851
Periaquaductal Grey, Lateral	Yes	1.6	1.37851
Pulvinar	Yes	1.6	1.37851
Retrosplenial Cortex	Yes	1.6	1.37851
Supraoptic Nucleus	Yes	1.6	1.37851
Area Parastriata, Temporal	Yes	1.5	1.32193
Entorhinal Gyrus	Yes	1.5	1.32193
Orbitofrontal Gyrus, Lateral	Yes	1.5	1.32193
Parahippocampal Cortex	Yes	1.5	1.32193
Postcentral Gyrus, Middle	Yes	1.5	1.32193
Ventromedial Prefrontal Cortex	Yes	1.5	1.32193
Area Striata	Yes	1.4	1.26303
Dorsal Raphe Nucleus	Yes	1.4	1.26303
Frontal Operculum	Yes	1.4	1.26303
Inferior Parietal Lobule	Yes	1.4	1.26303
Intraparietal Deep Sulcus	Yes	1.4	1.26303
Occipital Cortex	Yes	1.4	1.26303
Orbitofrontal Gyrus, Anterior	Yes	1.4	1.26303
Parieto-Occipital Transitional Area	Yes	1.4	1.26303
Seminal Vesicle	Yes	1.4	1.26303
Superior Frontal Gyrus	Yes	1.4	1.26303
Superior Parietal Lobule	Yes	1.4	1.26303
Temporo-Insular Cortex, Parainsular Gyrus	Yes	1.4	1.26303
Area Parastriata, Inferior	Yes	1.3	1.20163
Area Parastriata, Parietal	Yes	1.3	1.20163
Centromedial Thalamic Nucleus	Yes	1.3	1.20163
Claustrum	Yes	1.3	1.20163
Frontal Cortex	Yes	1.3	1.20163
Frontomarginal Cortex	Yes	1.3	1.20163
Gyrus Rectus	Yes	1.3	1.20163
Inferior Frontal Gyrus, Orbital	Yes	1.3	1.20163
Medial Geniculate Body	Yes	1.3	1.20163
Orbitofrontal Gyrus, Posterior	Yes	1.3	1.20163
Paraventricular Nucleus	Yes	1.3	1.20163
Substantia Nigra	Yes	1.3	1.20163
Ventral Tegmental Area	Yes	1.3	1.20163
Cuneiform Nucleus	Yes	1.2	1.1375
Dorsolateral Prefrontal Cortex	Yes	1.2	1.1375
Inferior Frontal Gyrus, Opercular	Yes	1.2	1.1375
Nuclei Of The Trapezoid Body	Yes	1.2	1.1375
Nucleus Tractus Solitarii	Yes	1.2	1.1375
Pontine Nuclei	Yes	1.2	1.1375
Pontine Raphe Nucleus	Yes	1.2	1.1375
Postcentral Gyrus, Ventral	Yes	1.2	1.1375
Precentral Gyrus, Middle	Yes	1.2	1.1375
Precuneus	Yes	1.2	1.1375
Premotor Cortex, Ventral	Yes	1.2	1.1375
Preoptic Area	Yes	1.2	1.1375
Subcentral Gyrus, S2	Yes	1.2	1.1375
Ventral Periolivary Nuclei	Yes	1.2	1.1375
Anterior Thalamic Nucleus, Ventral	Yes	1.1	1.07039
Arcuate Nucleus	Yes	1.1	1.07039
Area Parastriata, Superior	Yes	1.1	1.07039
Hippocampus, Ca3	Yes	1.1	1.07039
Middle Frontal Gyrus	Yes	1.1	1.07039
Orbitofrontal Gyrus, Medial	Yes	1.1	1.07039
Premotor Cortex, Dorsal	Yes	1.1	1.07039
Red Nucleus	Yes	1.1	1.07039
Ventral Posteromedial Thalamic Nucleus	Yes	1.1	1.07039
Amygdala	Yes	1	1
Area Striata (White Matter)	Yes	1	1
Corticomedial Amygdala	Yes	1	1
Dentate Gyrus	Yes	1	1
Dorsomedial Prefrontal Cortex	Yes	1	1
Hippocampus	Yes	1	1
Hippocampus, Ca2	Yes	1	1
Lateral Lemniscal Nuclei	Yes	1	1
Locus Coeruleus	Yes	1	1
Paracentral Lobule, Anterior	Yes	1	1
Paramedian Reticular Nucleus	Yes	1	1
Parietal Cortex	Yes	1	1
Postcentral Gyrus, Dorsal	Yes	1	1
Posterior Cingulate Cortex, Ventral	Yes	1	1
Prostate	No	1	1
Subcallosal Gyrus	Yes	1	1
Subiculum	Yes	1	1
Temporal Cortex	Yes	1	1
Vermis	Yes	1	1
Anterior Cingulate Cortex, Supragenual-Dorsal	Yes	0.9	0.925999
Anterior Cingulate Gyrus, Pregenual-Dorsal	Yes	0.9	0.925999
Anterior Cingulate Gyrus, Subgenual	Yes	0.9	0.925999
Cervical Spinal Cord, Central Gray	Yes	0.9	0.925999
Lateral Geniculate Body	Yes	0.9	0.925999
Lateral Hypothalamic Area	Yes	0.9	0.925999
Lateral Parabrachial Nucleus	Yes	0.9	0.925999
Medial Periolivary Nuclei	Yes	0.9	0.925999
Median Raphe Nucleus	Yes	0.9	0.925999
Nucleus Ambiguus	Yes	0.9	0.925999
Peritrigeminal Nucleus	Yes	0.9	0.925999
Precentral Gyrus, Dorsal	Yes	0.9	0.925999
Precentral Gyrus, Ventral	Yes	0.9	0.925999
Spinal Trigeminal Nucleus, Interpolar	Yes	0.9	0.925999
Subthalamic Nucleus	Yes	0.9	0.925999
Superior Vestibular Nucleus	Yes	0.9	0.925999
Basal Amygdala	Yes	0.8	0.847997
Central Amygdala	Yes	0.8	0.847997
Cerebellar Cortex	Yes	0.8	0.847997
Cerebellar Nuclei	Yes	0.8	0.847997
Corpus Callosum, Genu (White Matter)	Yes	0.8	0.847997
Dorsolateral Tegmental Area	Yes	0.8	0.847997
Flocculonodular Lobe	Yes	0.8	0.847997
Frontal Eye Field	Yes	0.8	0.847997
Lateral Amygdala	Yes	0.8	0.847997
Lateral Thalamic Nuclei	Yes	0.8	0.847997
Medial Vestibular Nucleus	Yes	0.8	0.847997
Motor Facial Nucleus	Yes	0.8	0.847997
Nucleus Raphe Magnus	Yes	0.8	0.847997
Nucleus Rhomboideus	Yes	0.8	0.847997
Parietal Operculum	Yes	0.8	0.847997
Pedunculopontine Tegmental Nucleus	Yes	0.8	0.847997
Principal Sensory Trigeminal Nucleus	Yes	0.8	0.847997
Spinal Trigeminal Nucleus, Oral	Yes	0.8	0.847997
Superior Olive	Yes	0.8	0.847997
Supplementary Motor Cortex	Yes	0.8	0.847997
Ventral Posterolateral Thalamic Nucleus	Yes	0.8	0.847997
Ventrolateral Prefrontal Cortex	Yes	0.8	0.847997
Anterior Cingulate Cortex, Supragenual-Ventral	Yes	0.7	0.765535
Anterior Cingulate Gyrus, Pregenual-Ventral	Yes	0.7	0.765535
Cervical Spinal Cord, Dorsal Horn	Yes	0.7	0.765535
Corpus Callosum, Splenium (White Matter)	Yes	0.7	0.765535
Dorsal Medullary Reticular Nucleus	Yes	0.7	0.765535
Dorsal Motor Vagal Complex	Yes	0.7	0.765535
Mamillary Body	Yes	0.7	0.765535
Motor Hypoglossal Nucleus	Yes	0.7	0.765535
Motor Trigeminal Nucleus	Yes	0.7	0.765535
Paracentral Lobule, Posterior	Yes	0.7	0.765535
Posterior Cingulate Cortex, Dorsal	Yes	0.7	0.765535
Posteroventral Cochlear Nucleus	Yes	0.7	0.765535
Prepositus Hypoglossal Nucleus	Yes	0.7	0.765535
Ventrolateral Medulla, A1-C1 Cell Groups	Yes	0.7	0.765535
Zona Incerta	Yes	0.7	0.765535
Anterior Cochlear Nucleus, Ventral	Yes	0.6	0.678072
Cervical Spinal Cord, Ventral Horn	Yes	0.6	0.678072
Cuneate Nuclei	Yes	0.6	0.678072
Dorsal Cochlear Nucleus	Yes	0.6	0.678072
Gigantocellular Reticular Nuclei, Pars	Yes	0.6	0.678072
Kolliker-Fuse Nucleus	Yes	0.6	0.678072
Lateral Vestibular Nucleus	Yes	0.6	0.678072
Middle Cingulate Cortex	Yes	0.6	0.678072
Occipital Cortex (White Matter)	Yes	0.6	0.678072
Parieto-Temporal Junction (White Matter)	Yes	0.6	0.678072
Parvicellular Reticular Nuclei, Medullary	Yes	0.6	0.678072
Periaquaductal Grey, Anterior	Yes	0.6	0.678072
Posterior Cingulate Cortex	Yes	0.6	0.678072
Posterior Thalamic Nucleus	Yes	0.6	0.678072
Precentral Gyrus	Yes	0.6	0.678072
Reticular Pontine Nucleus, Caudal	Yes	0.6	0.678072
Smooth Muscle	No	0.6	0.678072
Spinal Vestibular Nucleus	Yes	0.6	0.678072
Subcoeruleus Area	Yes	0.6	0.678072
Ventral Medullary Reticular Nucleus	Yes	0.6	0.678072
Ventrolateral Tegmental Area, A5 Ne Cell Group	Yes	0.6	0.678072
Caudate Nucleus	Yes	0.5	0.584963
Dorsal Tegmental Nucleus	Yes	0.5	0.584963
Gigantocellular Reticular Nuclei, Medullary	Yes	0.5	0.584963
Lateral Medullary Reticular Nucleus	Yes	0.5	0.584963
Medial Parabrachial Nucleus	Yes	0.5	0.584963
Nucleus Reuniens	Yes	0.5	0.584963
Postcentral Gyrus	Yes	0.5	0.584963
Reticular Pontine Nucleus, Oral	Yes	0.5	0.584963
Reticulotegmental Nucleus	Yes	0.5	0.584963
Somatomor Cortex, Precentral Gyrus (White Matter)	Yes	0.5	0.584963
Spinal Trigeminal Nucleus, Caudal	Yes	0.5	0.584963
Temporal White Matter	Yes	0.5	0.584963
Area Postrema	Yes	0.4	0.485427
Gallbladder	No	0.4	0.485427
Globus Pallidus, Internus	Yes	0.4	0.485427
Medial Olivary Nucleus	Yes	0.4	0.485427
Nucleus Raphe Obscurus	Yes	0.4	0.485427
Nucleus Raphe Pallidus	Yes	0.4	0.485427
Piriform Cortex	Yes	0.4	0.485427
Anterior Funiculus (White Matter)	Yes	0.3	0.378512
Cerebellar White Matter	Yes	0.3	0.378512
Choroid Plexus	Yes	0.3	0.378512
Esophagus	No	0.3	0.378512
Globus Pallidus, Externus	Yes	0.3	0.378512
Inferior Olive	Yes	0.3	0.378512
Lung	No	0.3	0.378512
Nucleus Accumbens	Yes	0.3	0.378512
Nucleus Cuneatus	Yes	0.3	0.378512
Parvicellular Reticular Nuclei	Yes	0.3	0.378512
Somatosensory Cortex, Postcentral Gyrus, Ventral (White Matter)	Yes	0.3	0.378512
Adrenal Gland	No	0.2	0.263034
Colon	No	0.2	0.263034
Dorsal Funiculus (White Matter)	Yes	0.2	0.263034
Fallopian Tube	Yes	0.2	0.263034
Lateral Funiculus (White Matter)	Yes	0.2	0.263034
Nucleus Gracilis	Yes	0.2	0.263034
Putamen	Yes	0.2	0.263034
Thymus	No	0.2	0.263034
Thyroid Gland	No	0.2	0.263034
Adipose Tissue	No	0.1	0.137504
Endometrium	No	0.1	0.137504
Liver	No	0.1	0.137504
Lymph Node	No	0.1	0.137504
Nucleus Basalis Of Meynert	Yes	0.1	0.137504
Parathyroid Gland	No	0.1	0.137504
Salivary Gland	No	0.1	0.137504
Small Intestine	No	0.1	0.137504
Tongue	No	0.1	0.137504
Tonsil	No	0.1	0.137504
Urinary Bladder	No	0.1	0.137504
Appendix	No	0	0
Bone Marrow	No	0	0
Breast	No	0	0
Cervix	No	0	0
Duodenum	No	0	0
Ovary	No	0	0
Pancreas	No	0	0
Rectum	No	0	0
Skeletal Muscle	No	0	0
Skin	No	0	0
Spleen	No	0	0
Stomach	No	0	0
