# Supplementary material for: MAEL in human cancers and implications in prognostication and predicting benefit from immunotherapy over VEGFR/mTOR inhibitors in clear cell renal cell carcinoma: a bioinformatic analysis
Source: Aging (Albany NY). 2024 Jan 31;16(3):2090–122. doi: 10.18632/aging.205470 (PMC10911358; doi:10.18632/aging.205470)
Supplement: Supplementary Table 4 [file aging-16-205470-s005.xlsx]

## Sheet: Sheet1
Supplementary Table 4. Single cell transcriptomics.
Tissue	Cluster	Cluster No.	Cell type		MAEL (TPM)	log2(TPM+1)
adipose tissue	c-0	0	Fibroblasts	c-0 Fibroblasts	0	0
adipose tissue	c-1	1	T-Cells	c-1 T-Cells	0.1	0.137504
adipose tissue	c-2	2	T-Cells	c-2 T-Cells	0.1	0.137504
adipose tissue	c-3	3	T-Cells	c-3 T-Cells	0	0
adipose tissue	c-4	4	Fibroblasts	c-4 Fibroblasts	0	0
adipose tissue	c-5	5	Macrophages	c-5 Macrophages	0.1	0.137504
adipose tissue	c-6	6	Dendritic Cells	c-6 Dendritic Cells	0.1	0.137504
adipose tissue	c-7	7	Fibroblasts	c-7 Fibroblasts	0	0
adipose tissue	c-8	8	Fibroblasts	c-8 Fibroblasts	0	0
adipose tissue	c-9	9	T-Cells	c-9 T-Cells	0.1	0.137504
adipose tissue	c-10	10	T-Cells	c-10 T-Cells	0	0
adipose tissue	c-11	11	Adipocytes	c-11 Adipocytes	0	0
adipose tissue	c-12	12	Macrophages	c-12 Macrophages	0	0
adipose tissue	c-13	13	Smooth Muscle Cells	c-13 Smooth Muscle Cells	0	0
adipose tissue	c-14	14	Dendritic Cells	c-14 Dendritic Cells	0.6	0.678072
adipose tissue	c-15	15	T-Cells	c-15 T-Cells	0	0
adipose tissue	c-16	16	Plasma Cells	c-16 Plasma Cells	0	0
adipose tissue	c-17	17	Macrophages	c-17 Macrophages	0	0
adipose tissue	c-18	18	B-Cells	c-18 B-Cells	0	0
adipose tissue	c-19	19	Macrophages	c-19 Macrophages	0.2	0.263034
adipose tissue	c-20	20	Fibroblasts	c-20 Fibroblasts	0	0
adipose tissue	c-21	21	Dendritic Cells	c-21 Dendritic Cells	0	0
adipose tissue	c-22	22	Adipocytes	c-22 Adipocytes	0	0
adipose tissue	c-23	23	Fibroblasts	c-23 Fibroblasts	0	0
bone marrow	c-0	0	T-Cells	c-0 T-Cells	0	0
bone marrow	c-1	1	T-Cells	c-1 T-Cells	0	0
bone marrow	c-2	2	T-Cells	c-2 T-Cells	0	0
bone marrow	c-3	3	B-Cells	c-3 B-Cells	0	0
bone marrow	c-4	4	T-Cells	c-4 T-Cells	0	0
bone marrow	c-5	5	T-Cells	c-5 T-Cells	0	0
bone marrow	c-6	6	Macrophages	c-6 Macrophages	0	0
bone marrow	c-7	7	T-Cells	c-7 T-Cells	0	0
bone marrow	c-8	8	Erythroid Cells	c-8 Erythroid Cells	0	0
bone marrow	c-9	9	Plasma Cells	c-9 Plasma Cells	0	0
brain	c-0	0	Excitatory Neurons	c-0 Excitatory Neurons	7.2	3.03562
brain	c-1	1	Excitatory Neurons	c-1 Excitatory Neurons	8.2	3.20163
brain	c-2	2	Excitatory Neurons	c-2 Excitatory Neurons	20.7	4.43962
brain	c-3	3	Excitatory Neurons	c-3 Excitatory Neurons	20	4.39232
brain	c-4	4	Excitatory Neurons	c-4 Excitatory Neurons	6.6	2.926
brain	c-5	5	Inhibitory Neurons	c-5 Inhibitory Neurons	1.3	1.20163
brain	c-6	6	Inhibitory Neurons	c-6 Inhibitory Neurons	9.3	3.36457
brain	c-7	7	Excitatory Neurons	c-7 Excitatory Neurons	24.3	4.66107
brain	c-8	8	Inhibitory Neurons	c-8 Inhibitory Neurons	0.5	0.584963
brain	c-9	9	Excitatory Neurons	c-9 Excitatory Neurons	33.2	5.09592
brain	c-10	10	Excitatory Neurons	c-10 Excitatory Neurons	29.8	4.94486
brain	c-11	11	Excitatory Neurons	c-11 Excitatory Neurons	19.6	4.36457
brain	c-12	12	Oligodendrocytes	c-12 Oligodendrocytes	5.4	2.67807
brain	c-13	13	Excitatory Neurons	c-13 Excitatory Neurons	10.4	3.51096
brain	c-14	14	Inhibitory Neurons	c-14 Inhibitory Neurons	10.9	3.57289
brain	c-15	15	Inhibitory Neurons	c-15 Inhibitory Neurons	11.6	3.65535
brain	c-16	16	Excitatory Neurons	c-16 Excitatory Neurons	20.5	4.42626
brain	c-17	17	Inhibitory Neurons	c-17 Inhibitory Neurons	9	3.32193
brain	c-18	18	Excitatory Neurons	c-18 Excitatory Neurons	13.6	3.8679
brain	c-19	19	Excitatory Neurons	c-19 Excitatory Neurons	14	3.90689
brain	c-20	20	Excitatory Neurons	c-20 Excitatory Neurons	22.3	4.54226
brain	c-21	21	Inhibitory Neurons	c-21 Inhibitory Neurons	3.6	2.20163
brain	c-22	22	Excitatory Neurons	c-22 Excitatory Neurons	5.2	2.63227
brain	c-23	23	Inhibitory Neurons	c-23 Inhibitory Neurons	5.4	2.67807
brain	c-24	24	Excitatory Neurons	c-24 Excitatory Neurons	23.1	4.59096
brain	c-25	25	Inhibitory Neurons	c-25 Inhibitory Neurons	4.5	2.45943
brain	c-26	26	Inhibitory Neurons	c-26 Inhibitory Neurons	3.5	2.16993
brain	c-27	27	Excitatory Neurons	c-27 Excitatory Neurons	22.6	4.56071
brain	c-28	28	Inhibitory Neurons	c-28 Inhibitory Neurons	0.8	0.847997
brain	c-29	29	Excitatory Neurons	c-29 Excitatory Neurons	16.6	4.1375
brain	c-30	30	Inhibitory Neurons	c-30 Inhibitory Neurons	2.6	1.848
brain	c-31	31	Excitatory Neurons	c-31 Excitatory Neurons	11	3.58496
brain	c-32	32	Excitatory Neurons	c-32 Excitatory Neurons	21.9	4.51728
brain	c-33	33	Excitatory Neurons	c-33 Excitatory Neurons	11.4	3.63227
brain	c-34	34	Excitatory Neurons	c-34 Excitatory Neurons	6.5	2.90689
brain	c-35	35	Astrocytes	c-35 Astrocytes	17.5	4.20945
brain	c-36	36	Excitatory Neurons	c-36 Excitatory Neurons	5.2	2.63227
brain	c-37	37	Oligodendrocytes	c-37 Oligodendrocytes	1.8	1.48543
brain	c-38	38	Inhibitory Neurons	c-38 Inhibitory Neurons	17.3	4.19377
brain	c-39	39	Excitatory Neurons	c-39 Excitatory Neurons	12	3.70044
brain	c-40	40	Excitatory Neurons	c-40 Excitatory Neurons	9	3.32193
brain	c-41	41	Inhibitory Neurons	c-41 Inhibitory Neurons	0.6	0.678072
brain	c-42	42	Oligodendrocyte Precursor Cells	c-42 Oligodendrocyte Precursor Cells	12.6	3.76553
brain	c-43	43	Microglial Cells	c-43 Microglial Cells	2.6	1.848
brain	c-44	44	Excitatory Neurons	c-44 Excitatory Neurons	12.4	3.74416
breast	c-0	0	Breast Glandular Cells	c-0 Breast Glandular Cells	0	0
breast	c-1	1	T-Cells	c-1 T-Cells	0.4	0.485427
breast	c-2	2	Breast Glandular Cells	c-2 Breast Glandular Cells	0.2	0.263034
breast	c-3	3	Fibroblasts	c-3 Fibroblasts	0	0
breast	c-4	4	T-Cells	c-4 T-Cells	0	0
breast	c-5	5	Macrophages	c-5 Macrophages	0.2	0.263034
breast	c-6	6	Endothelial Cells	c-6 Endothelial Cells	0.2	0.263034
breast	c-7	7	Adipocytes	c-7 Adipocytes	0.2	0.263034
breast	c-8	8	T-Cells	c-8 T-Cells	0.4	0.485427
breast	c-9	9	Fibroblasts	c-9 Fibroblasts	0	0
breast	c-10	10	Adipocytes	c-10 Adipocytes	0.9	0.925999
breast	c-11	11	Breast Glandular Cells	c-11 Breast Glandular Cells	0.1	0.137504
breast	c-12	12	Macrophages	c-12 Macrophages	0	0
breast	c-13	13	T-Cells	c-13 T-Cells	0	0
breast	c-14	14	Smooth Muscle Cells	c-14 Smooth Muscle Cells	0.2	0.263034
breast	c-15	15	Dendritic Cells	c-15 Dendritic Cells	0	0
breast	c-16	16	Fibroblasts	c-16 Fibroblasts	0	0
breast	c-17	17	Breast Glandular Cells	c-17 Breast Glandular Cells	0	0
breast	c-18	18	Breast Glandular Cells	c-18 Breast Glandular Cells	0.1	0.137504
breast	c-19	19	Breast Glandular Cells	c-19 Breast Glandular Cells	0.2	0.263034
breast	c-20	20	Breast Myoepithelial Cells	c-20 Breast Myoepithelial Cells	0.1	0.137504
breast	c-21	21	Breast Glandular Cells	c-21 Breast Glandular Cells	0	0
breast	c-22	22	Endothelial Cells	c-22 Endothelial Cells	2.8	1.926
breast	c-23	23	B-Cells	c-23 B-Cells	0	0
breast	c-24	24	Endothelial Cells	c-24 Endothelial Cells	0	0
breast	c-25	25	Adipocytes	c-25 Adipocytes	0	0
bronchus	c-0	0	Basal Respiratory Cells	c-0 Basal Respiratory Cells	0	0
bronchus	c-1	1	Respiratory Ciliated Cells	c-1 Respiratory Ciliated Cells	0	0
bronchus	c-2	2	Club Cells	c-2 Club Cells	0	0
bronchus	c-3	3	Club Cells	c-3 Club Cells	0	0
bronchus	c-4	4	Basal Respiratory Cells	c-4 Basal Respiratory Cells	0	0
bronchus	c-5	5	Club Cells	c-5 Club Cells	0	0
bronchus	c-6	6	Basal Respiratory Cells	c-6 Basal Respiratory Cells	0	0
bronchus	c-7	7	Basal Respiratory Cells	c-7 Basal Respiratory Cells	0	0
bronchus	c-8	8	Club Cells	c-8 Club Cells	0	0
bronchus	c-9	9	Club Cells	c-9 Club Cells	0	0
bronchus	c-10	10	Respiratory Ciliated Cells	c-10 Respiratory Ciliated Cells	0	0
bronchus	c-11	11	Basal Respiratory Cells	c-11 Basal Respiratory Cells	0	0
bronchus	c-12	12	Basal Respiratory Cells	c-12 Basal Respiratory Cells	0	0
bronchus	c-13	13	Smooth Muscle Cells	c-13 Smooth Muscle Cells	0	0
bronchus	c-14	14	Smooth Muscle Cells	c-14 Smooth Muscle Cells	0	0
bronchus	c-15	15	Ionocytes	c-15 Ionocytes	0	0
bronchus	c-16	16	Club Cells	c-16 Club Cells	0	0
colon	c-0	0	Distal Enterocytes	c-0 Distal Enterocytes	0	0
colon	c-1	1	Intestinal Goblet Cells	c-1 Intestinal Goblet Cells	0	0
colon	c-2	2	Undifferentiated Cells	c-2 Undifferentiated Cells	0	0
colon	c-3	3	T-Cells	c-3 T-Cells	1.6	1.37851
colon	c-4	4	Distal Enterocytes	c-4 Distal Enterocytes	0	0
colon	c-5	5	Distal Enterocytes	c-5 Distal Enterocytes	0	0
colon	c-6	6	Distal Enterocytes	c-6 Distal Enterocytes	0	0
colon	c-7	7	Distal Enterocytes	c-7 Distal Enterocytes	0	0
colon	c-8	8	Undifferentiated Cells	c-8 Undifferentiated Cells	0	0
colon	c-9	9	Distal Enterocytes	c-9 Distal Enterocytes	0	0
colon	c-10	10	Distal Enterocytes	c-10 Distal Enterocytes	0	0
colon	c-11	11	Paneth Cells	c-11 Paneth Cells	0	0
colon	c-12	12	B-Cells	c-12 B-Cells	0	0
colon	c-13	13	Undifferentiated Cells	c-13 Undifferentiated Cells	0	0
colon	c-14	14	Enteroendocrine Cells	c-14 Enteroendocrine Cells	0	0
colon	c-15	15	Granulocytes	c-15 Granulocytes	0	0
endometrium	c-0	0	Glandular And Luminal Cells	c-0 Glandular And Luminal Cells	0.1	0.137504
endometrium	c-1	1	Glandular And Luminal Cells	c-1 Glandular And Luminal Cells	0	0
endometrium	c-2	2	Glandular And Luminal Cells	c-2 Glandular And Luminal Cells	0	0
endometrium	c-3	3	Endometrial Stromal Cells	c-3 Endometrial Stromal Cells	0	0
endometrium	c-4	4	T-Cells	c-4 T-Cells	0	0
endometrium	c-5	5	Endometrial Stromal Cells	c-5 Endometrial Stromal Cells	0	0
endometrium	c-6	6	Endometrial Stromal Cells	c-6 Endometrial Stromal Cells	0	0
endometrium	c-7	7	Glandular And Luminal Cells	c-7 Glandular And Luminal Cells	0	0
endometrium	c-8	8	Endometrial Stromal Cells	c-8 Endometrial Stromal Cells	0	0
endometrium	c-9	9	Glandular And Luminal Cells	c-9 Glandular And Luminal Cells	0	0
endometrium	c-10	10	Glandular And Luminal Cells	c-10 Glandular And Luminal Cells	0	0
endometrium	c-11	11	Glandular And Luminal Cells	c-11 Glandular And Luminal Cells	0	0
endometrium	c-12	12	Endometrial Stromal Cells	c-12 Endometrial Stromal Cells	0.1	0.137504
endometrium	c-13	13	Glandular And Luminal Cells	c-13 Glandular And Luminal Cells	0	0
endometrium	c-14	14	Endothelial Cells	c-14 Endothelial Cells	0	0
endometrium	c-15	15	Glandular And Luminal Cells	c-15 Glandular And Luminal Cells	0	0
endometrium	c-16	16	Endometrial Ciliated Cells	c-16 Endometrial Ciliated Cells	0.1	0.137504
endometrium	c-17	17	Glandular And Luminal Cells	c-17 Glandular And Luminal Cells	0.2	0.263034
endometrium	c-18	18	Endometrial Stromal Cells	c-18 Endometrial Stromal Cells	0.1	0.137504
endometrium	c-19	19	Endometrial Ciliated Cells	c-19 Endometrial Ciliated Cells	0	0
endometrium	c-20	20	Glandular And Luminal Cells	c-20 Glandular And Luminal Cells	0	0
endometrium	c-21	21	Smooth Muscle Cells	c-21 Smooth Muscle Cells	0.4	0.485427
endometrium	c-22	22	Endometrial Stromal Cells	c-22 Endometrial Stromal Cells	0.2	0.263034
endometrium	c-23	23	Glandular And Luminal Cells	c-23 Glandular And Luminal Cells	0.2	0.263034
endometrium	c-24	24	Endometrial Stromal Cells	c-24 Endometrial Stromal Cells	0.1	0.137504
endometrium	c-25	25	Endometrial Stromal Cells	c-25 Endometrial Stromal Cells	0	0
endometrium	c-26	26	T-Cells	c-26 T-Cells	0	0
endometrium	c-27	27	Endometrial Ciliated Cells	c-27 Endometrial Ciliated Cells	0	0
endometrium	c-28	28	Macrophages	c-28 Macrophages	0	0
endometrium	c-29	29	Glandular And Luminal Cells	c-29 Glandular And Luminal Cells	0	0
esophagus	c-0	0	Fibroblasts	c-0 Fibroblasts	0	0
esophagus	c-1	1	Squamous Epithelial Cells	c-1 Squamous Epithelial Cells	0	0
esophagus	c-2	2	Squamous Epithelial Cells	c-2 Squamous Epithelial Cells	0	0
esophagus	c-3	3	Squamous Epithelial Cells	c-3 Squamous Epithelial Cells	0	0
esophagus	c-4	4	Fibroblasts	c-4 Fibroblasts	0	0
esophagus	c-5	5	Endothelial Cells	c-5 Endothelial Cells	0	0
esophagus	c-6	6	Fibroblasts	c-6 Fibroblasts	0	0
esophagus	c-7	7	Basal Squamous Epithelial Cells	c-7 Basal Squamous Epithelial Cells	0	0
esophagus	c-8	8	Squamous Epithelial Cells	c-8 Squamous Epithelial Cells	0	0
esophagus	c-9	9	Smooth Muscle Cells	c-9 Smooth Muscle Cells	0	0
esophagus	c-10	10	Macrophages	c-10 Macrophages	0	0
esophagus	c-11	11	Fibroblasts	c-11 Fibroblasts	0	0
esophagus	c-12	12	Plasma Cells	c-12 Plasma Cells	0	0
esophagus	c-13	13	T-Cells	c-13 T-Cells	0	0
esophagus	c-14	14	Fibroblasts	c-14 Fibroblasts	0	0
esophagus	c-15	15	Endothelial Cells	c-15 Endothelial Cells	0	0
eye	c-0	0	Rod Photoreceptor Cells	c-0 Rod Photoreceptor Cells	4.4	2.43296
eye	c-1	1	Muller Glia Cells	c-1 Muller Glia Cells	66.9	6.08534
eye	c-2	2	Rod Photoreceptor Cells	c-2 Rod Photoreceptor Cells	2.5	1.80735
eye	c-3	3	Rod Photoreceptor Cells	c-3 Rod Photoreceptor Cells	2.5	1.80735
eye	c-4	4	Rod Photoreceptor Cells	c-4 Rod Photoreceptor Cells	1.7	1.43296
eye	c-5	5	Bipolar Cells	c-5 Bipolar Cells	0.6	0.678072
eye	c-6	6	Muller Glia Cells	c-6 Muller Glia Cells	48.2	5.62059
eye	c-7	7	Muller Glia Cells	c-7 Muller Glia Cells	76.9	6.28355
eye	c-8	8	Bipolar Cells	c-8 Bipolar Cells	4.8	2.53605
eye	c-9	9	Bipolar Cells	c-9 Bipolar Cells	1.8	1.48543
eye	c-10	10	Bipolar Cells	c-10 Bipolar Cells	14.4	3.94486
eye	c-11	11	Cone Photoreceptor Cells	c-11 Cone Photoreceptor Cells	0	0
eye	c-12	12	Horizontal Cells	c-12 Horizontal Cells	0	0
eye	c-13	13	Endothelial Cells	c-13 Endothelial Cells	0	0
heart muscle	c-0	0	Cardiomyocytes	c-0 Cardiomyocytes	0.5	0.584963
heart muscle	c-1	1	Cardiomyocytes	c-1 Cardiomyocytes	2.3	1.72247
heart muscle	c-2	2	Endothelial Cells	c-2 Endothelial Cells	0.5	0.584963
heart muscle	c-3	3	Cardiomyocytes	c-3 Cardiomyocytes	3.8	2.26303
heart muscle	c-4	4	Cardiomyocytes	c-4 Cardiomyocytes	1.7	1.43296
heart muscle	c-5	5	Endothelial Cells	c-5 Endothelial Cells	0.7	0.765535
heart muscle	c-6	6	Mixed Immune Cells	c-6 Mixed Immune Cells	1.6	1.37851
heart muscle	c-7	7	Smooth Muscle Cells	c-7 Smooth Muscle Cells	2.5	1.80735
heart muscle	c-8	8	Cardiomyocytes	c-8 Cardiomyocytes	3.2	2.07039
heart muscle	c-9	9	Fibroblasts	c-9 Fibroblasts	0.7	0.765535
kidney	c-0	0	Proximal Tubular Cells	c-0 Proximal Tubular Cells	3.2	2.07039
kidney	c-1	1	Proximal Tubular Cells	c-1 Proximal Tubular Cells	3.6	2.20163
kidney	c-2	2	Proximal Tubular Cells	c-2 Proximal Tubular Cells	2.8	1.926
kidney	c-3	3	Proximal Tubular Cells	c-3 Proximal Tubular Cells	2.9	1.96347
kidney	c-4	4	Proximal Tubular Cells	c-4 Proximal Tubular Cells	4.2	2.37851
kidney	c-5	5	Proximal Tubular Cells	c-5 Proximal Tubular Cells	2.1	1.63227
kidney	c-6	6	Proximal Tubular Cells	c-6 Proximal Tubular Cells	2.8	1.926
kidney	c-7	7	T-Cells	c-7 T-Cells	1.2	1.1375
kidney	c-8	8	Proximal Tubular Cells	c-8 Proximal Tubular Cells	3.7	2.23266
kidney	c-9	9	Macrophages	c-9 Macrophages	0	0
kidney	c-10	10	Proximal Tubular Cells	c-10 Proximal Tubular Cells	1.4	1.26303
kidney	c-11	11	Distal Tubular Cells	c-11 Distal Tubular Cells	0	0
kidney	c-12	12	Collecting Duct Cells	c-12 Collecting Duct Cells	0	0
kidney	c-13	13	B-Cells	c-13 B-Cells	0	0
liver	c-0	0	Hepatocytes	c-0 Hepatocytes	0.1	0.137504
liver	c-1	1	T-Cells	c-1 T-Cells	0	0
liver	c-2	2	Hepatocytes	c-2 Hepatocytes	0	0
liver	c-3	3	Kupffer Cells	c-3 Kupffer Cells	0	0
liver	c-4	4	Hepatic Stellate Cells	c-4 Hepatic Stellate Cells	0	0
liver	c-5	5	Hepatocytes	c-5 Hepatocytes	0	0
liver	c-6	6	B-Cells	c-6 B-Cells	0	0
liver	c-7	7	Hepatocytes	c-7 Hepatocytes	0	0
liver	c-8	8	T-Cells	c-8 T-Cells	1.4	1.26303
liver	c-9	9	Kupffer Cells	c-9 Kupffer Cells	0	0
liver	c-10	10	T-Cells	c-10 T-Cells	0	0
liver	c-11	11	Hepatocytes	c-11 Hepatocytes	0	0
liver	c-12	12	Endothelial Cells	c-12 Endothelial Cells	0	0
liver	c-13	13	B-Cells	c-13 B-Cells	0	0
liver	c-14	14	Cholangiocytes	c-14 Cholangiocytes	0	0
liver	c-15	15	T-Cells	c-15 T-Cells	0	0
liver	c-16	16	Erythroid Cells	c-16 Erythroid Cells	0	0
lung	c-0	0	Macrophages	c-0 Macrophages	0	0
lung	c-1	1	Alveolar Cells Type 2	c-1 Alveolar Cells Type 2	0	0
lung	c-2	2	Macrophages	c-2 Macrophages	0	0
lung	c-3	3	T-Cells	c-3 T-Cells	0	0
lung	c-4	4	Granulocytes	c-4 Granulocytes	0	0
lung	c-5	5	Fibroblasts	c-5 Fibroblasts	0	0
lung	c-6	6	Alveolar Cells Type 2	c-6 Alveolar Cells Type 2	0	0
lung	c-7	7	Club Cells	c-7 Club Cells	0	0
lung	c-8	8	Respiratory Ciliated Cells	c-8 Respiratory Ciliated Cells	0	0
lung	c-9	9	Endothelial Cells	c-9 Endothelial Cells	0	0
lung	c-10	10	Alveolar Cells Type 1	c-10 Alveolar Cells Type 1	0	0
lymph node	c-0	0	B-Cells	c-0 B-Cells	0	0
lymph node	c-1	1	T-Cells	c-1 T-Cells	0	0
lymph node	c-2	2	B-Cells	c-2 B-Cells	0	0
lymph node	c-3	3	T-Cells	c-3 T-Cells	0	0
lymph node	c-4	4	B-Cells	c-4 B-Cells	0	0
lymph node	c-5	5	B-Cells	c-5 B-Cells	0	0
lymph node	c-6	6	B-Cells	c-6 B-Cells	0	0
lymph node	c-7	7	B-Cells	c-7 B-Cells	0	0
ovary	c-0	0	Granulosa Cells	c-0 Granulosa Cells	0	0
ovary	c-1	1	Granulosa Cells	c-1 Granulosa Cells	0.2	0.263034
ovary	c-2	2	Granulosa Cells	c-2 Granulosa Cells	0.7	0.765535
ovary	c-3	3	Fibroblasts	c-3 Fibroblasts	0	0
ovary	c-4	4	Endothelial Cells	c-4 Endothelial Cells	0	0
ovary	c-5	5	Granulosa Cells	c-5 Granulosa Cells	0.2	0.263034
ovary	c-6	6	Smooth Muscle Cells	c-6 Smooth Muscle Cells	0.1	0.137504
ovary	c-7	7	Granulosa Cells	c-7 Granulosa Cells	0.2	0.263034
ovary	c-8	8	Granulosa Cells	c-8 Granulosa Cells	0.2	0.263034
ovary	c-9	9	Granulosa Cells	c-9 Granulosa Cells	0.3	0.378512
ovary	c-10	10	Macrophages	c-10 Macrophages	0.1	0.137504
ovary	c-11	11	Theca Cells	c-11 Theca Cells	0.2	0.263034
ovary	c-12	12	Granulosa Cells	c-12 Granulosa Cells	0.1	0.137504
ovary	c-13	13	Smooth Muscle Cells	c-13 Smooth Muscle Cells	0.2	0.263034
ovary	c-14	14	Granulosa Cells	c-14 Granulosa Cells	0.1	0.137504
ovary	c-15	15	Fibroblasts	c-15 Fibroblasts	0	0
ovary	c-16	16	Granulosa Cells	c-16 Granulosa Cells	0	0
ovary	c-17	17	T-Cells	c-17 T-Cells	0	0
ovary	c-18	18	Mixed Cell Types	c-18 Mixed Cell Types	0	0
ovary	c-19	19	Macrophages	c-19 Macrophages	0	0
ovary	c-20	20	Theca Cells	c-20 Theca Cells	0	0
ovary	c-21	21	Fibroblasts	c-21 Fibroblasts	0	0
ovary	c-22	22	Endothelial Cells	c-22 Endothelial Cells	0	0
pancreas	c-0	0	Ductal Cells	c-0 Ductal Cells	0.1	0.137504
pancreas	c-1	1	Pancreatic Endocrine Cells	c-1 Pancreatic Endocrine Cells	0	0
pancreas	c-2	2	Ductal Cells	c-2 Ductal Cells	0	0
pancreas	c-3	3	Mixed Cell Types	c-3 Mixed Cell Types	0.3	0.378512
pancreas	c-4	4	Ductal Cells	c-4 Ductal Cells	0.2	0.263034
pancreas	c-5	5	Smooth Muscle Cells	c-5 Smooth Muscle Cells	0	0
pancreas	c-6	6	Pancreatic Endocrine Cells	c-6 Pancreatic Endocrine Cells	0	0
pancreas	c-7	7	Exocrine Glandular Cells	c-7 Exocrine Glandular Cells	0.2	0.263034
pancreas	c-8	8	Mixed Cell Types	c-8 Mixed Cell Types	0	0
pancreas	c-9	9	Exocrine Glandular Cells	c-9 Exocrine Glandular Cells	0	0
pancreas	c-10	10	Ductal Cells	c-10 Ductal Cells	0	0
pancreas	c-11	11	Monocytes	c-11 Monocytes	0	0
pancreas	c-12	12	Mixed Cell Types	c-12 Mixed Cell Types	0	0
pancreas	c-13	13	Macrophages	c-13 Macrophages	0	0
pancreas	c-14	14	Endothelial Cells	c-14 Endothelial Cells	0	0
pbmc	c-0	0	Monocytes	c-0 Monocytes	0	0
pbmc	c-1	1	T-Cells	c-1 T-Cells	0	0
pbmc	c-2	2	T-Cells	c-2 T-Cells	0	0
pbmc	c-3	3	T-Cells	c-3 T-Cells	0	0
pbmc	c-4	4	T-Cells	c-4 T-Cells	0	0
pbmc	c-5	5	Nk-Cells	c-5 Nk-Cells	0	0
pbmc	c-6	6	T-Cells	c-6 T-Cells	0	0
pbmc	c-7	7	Monocytes	c-7 Monocytes	0	0
pbmc	c-8	8	B-Cells	c-8 B-Cells	1.1	1.07039
pbmc	c-9	9	Monocytes	c-9 Monocytes	0	0
pbmc	c-10	10	Dendritic Cells	c-10 Dendritic Cells	0	0
pbmc	c-11	11	Macrophages	c-11 Macrophages	0	0
placenta	c-0	0	Cytotrophoblasts	c-0 Cytotrophoblasts	0.2	0.263034
placenta	c-1	1	Extravillous Trophoblasts	c-1 Extravillous Trophoblasts	0.3	0.378512
placenta	c-2	2	Cytotrophoblasts	c-2 Cytotrophoblasts	0.2	0.263034
placenta	c-3	3	Fibroblasts	c-3 Fibroblasts	54.9	5.80478
placenta	c-4	4	Hofbauer Cells	c-4 Hofbauer Cells	0.3	0.378512
placenta	c-5	5	Cytotrophoblasts	c-5 Cytotrophoblasts	0.2	0.263034
placenta	c-6	6	Extravillous Trophoblasts	c-6 Extravillous Trophoblasts	0.4	0.485427
placenta	c-7	7	Cytotrophoblasts	c-7 Cytotrophoblasts	0.3	0.378512
placenta	c-8	8	Cytotrophoblasts	c-8 Cytotrophoblasts	0.3	0.378512
placenta	c-9	9	Hofbauer Cells	c-9 Hofbauer Cells	0.3	0.378512
placenta	c-10	10	Syncytiotrophoblasts	c-10 Syncytiotrophoblasts	0.2	0.263034
placenta	c-11	11	Cytotrophoblasts	c-11 Cytotrophoblasts	0.8	0.847997
placenta	c-12	12	Extravillous Trophoblasts	c-12 Extravillous Trophoblasts	0.1	0.137504
placenta	c-13	13	Cytotrophoblasts	c-13 Cytotrophoblasts	0.6	0.678072
placenta	c-14	14	Cytotrophoblasts	c-14 Cytotrophoblasts	0.2	0.263034
placenta	c-15	15	Fibroblasts	c-15 Fibroblasts	71	6.16993
placenta	c-16	16	Fibroblasts	c-16 Fibroblasts	38.8	5.3147
placenta	c-17	17	Endothelial Cells	c-17 Endothelial Cells	9.9	3.44626
placenta	c-18	18	Fibroblasts	c-18 Fibroblasts	11.5	3.64386
prostate	c-0	0	Basal Prostatic Cells	c-0 Basal Prostatic Cells	0.4	0.485427
prostate	c-1	1	Basal Prostatic Cells	c-1 Basal Prostatic Cells	0.3	0.378512
prostate	c-2	2	Prostatic Glandular Cells	c-2 Prostatic Glandular Cells	0.1	0.137504
prostate	c-3	3	Basal Prostatic Cells	c-3 Basal Prostatic Cells	0.5	0.584963
prostate	c-4	4	Basal Prostatic Cells	c-4 Basal Prostatic Cells	0.3	0.378512
prostate	c-5	5	Urothelial Cells	c-5 Urothelial Cells	0.1	0.137504
prostate	c-6	6	Prostatic Glandular Cells	c-6 Prostatic Glandular Cells	0.1	0.137504
prostate	c-7	7	Endothelial Cells	c-7 Endothelial Cells	0.5	0.584963
prostate	c-8	8	Urothelial Cells	c-8 Urothelial Cells	0.1	0.137504
prostate	c-9	9	Fibroblasts	c-9 Fibroblasts	0.2	0.263034
prostate	c-10	10	Basal Prostatic Cells	c-10 Basal Prostatic Cells	0.2	0.263034
prostate	c-11	11	Urothelial Cells	c-11 Urothelial Cells	0.1	0.137504
prostate	c-12	12	Smooth Muscle Cells	c-12 Smooth Muscle Cells	0.3	0.378512
prostate	c-13	13	Prostatic Glandular Cells	c-13 Prostatic Glandular Cells	0.2	0.263034
prostate	c-14	14	Prostatic Glandular Cells	c-14 Prostatic Glandular Cells	0.3	0.378512
prostate	c-15	15	Macrophages	c-15 Macrophages	0	0
prostate	c-16	16	T-Cells	c-16 T-Cells	0	0
rectum	c-0	0	Undifferentiated Cells	c-0 Undifferentiated Cells	0	0
rectum	c-1	1	Intestinal Goblet Cells	c-1 Intestinal Goblet Cells	0	0
rectum	c-2	2	Paneth Cells	c-2 Paneth Cells	0	0
rectum	c-3	3	Undifferentiated Cells	c-3 Undifferentiated Cells	0	0
rectum	c-4	4	Intestinal Goblet Cells	c-4 Intestinal Goblet Cells	0	0
rectum	c-5	5	Distal Enterocytes	c-5 Distal Enterocytes	0	0
rectum	c-6	6	Undifferentiated Cells	c-6 Undifferentiated Cells	0	0
rectum	c-7	7	Undifferentiated Cells	c-7 Undifferentiated Cells	0	0
rectum	c-8	8	Undifferentiated Cells	c-8 Undifferentiated Cells	0	0
rectum	c-9	9	Distal Enterocytes	c-9 Distal Enterocytes	0	0
rectum	c-10	10	Intestinal Goblet Cells	c-10 Intestinal Goblet Cells	0	0
rectum	c-11	11	Enteroendocrine Cells	c-11 Enteroendocrine Cells	0	0
skeletal muscle	c-0	0	Fibroblasts	c-0 Fibroblasts	0.7	0.765535
skeletal muscle	c-1	1	Fibroblasts	c-1 Fibroblasts	0.6	0.678072
skeletal muscle	c-2	2	Skeletal Myocytes	c-2 Skeletal Myocytes	5.1	2.60881
skeletal muscle	c-3	3	Endothelial Cells	c-3 Endothelial Cells	0.6	0.678072
skeletal muscle	c-4	4	Fibroblasts	c-4 Fibroblasts	0.8	0.847997
skeletal muscle	c-5	5	Fibroblasts	c-5 Fibroblasts	1	1
skeletal muscle	c-6	6	Smooth Muscle Cells	c-6 Smooth Muscle Cells	0.6	0.678072
skeletal muscle	c-7	7	Skeletal Myocytes	c-7 Skeletal Myocytes	3.4	2.1375
skeletal muscle	c-8	8	T-Cells	c-8 T-Cells	0.3	0.378512
skeletal muscle	c-9	9	Fibroblasts	c-9 Fibroblasts	0	0
skeletal muscle	c-10	10	Fibroblasts	c-10 Fibroblasts	0.2	0.263034
skeletal muscle	c-11	11	Endothelial Cells	c-11 Endothelial Cells	0.6	0.678072
skeletal muscle	c-12	12	Endothelial Cells	c-12 Endothelial Cells	0	0
skeletal muscle	c-13	13	Macrophages	c-13 Macrophages	1.2	1.1375
skeletal muscle	c-14	14	Macrophages	c-14 Macrophages	0	0
skeletal muscle	c-15	15	Endothelial Cells	c-15 Endothelial Cells	0	0
skeletal muscle	c-16	16	Fibroblasts	c-16 Fibroblasts	0	0
skeletal muscle	c-17	17	Fibroblasts	c-17 Fibroblasts	0	0
skeletal muscle	c-18	18	Skeletal Myocytes	c-18 Skeletal Myocytes	0	0
skeletal muscle	c-19	19	Fibroblasts	c-19 Fibroblasts	0	0
skeletal muscle	c-20	20	Fibroblasts	c-20 Fibroblasts	0	0
skeletal muscle	c-21	21	Endothelial Cells	c-21 Endothelial Cells	0	0
skeletal muscle	c-22	22	Fibroblasts	c-22 Fibroblasts	5.2	2.63227
skin	c-0	0	Langerhans Cells	c-0 Langerhans Cells	0.2	0.263034
skin	c-1	1	Fibroblasts	c-1 Fibroblasts	0	0
skin	c-2	2	Fibroblasts	c-2 Fibroblasts	0.4	0.485427
skin	c-3	3	Fibroblasts	c-3 Fibroblasts	0	0
skin	c-4	4	Endothelial Cells	c-4 Endothelial Cells	0.1	0.137504
skin	c-5	5	Basal Keratinocytes	c-5 Basal Keratinocytes	0.1	0.137504
skin	c-6	6	Suprabasal Keratinocytes	c-6 Suprabasal Keratinocytes	0	0
skin	c-7	7	T-Cells	c-7 T-Cells	0	0
skin	c-8	8	Smooth Muscle Cells	c-8 Smooth Muscle Cells	0.9	0.925999
skin	c-9	9	Fibroblasts	c-9 Fibroblasts	0	0
skin	c-10	10	Smooth Muscle Cells	c-10 Smooth Muscle Cells	0	0
skin	c-11	11	Endothelial Cells	c-11 Endothelial Cells	0	0
skin	c-12	12	Langerhans Cells	c-12 Langerhans Cells	0	0
skin	c-13	13	Melanocytes	c-13 Melanocytes	0	0
small intestine	c-0	0	Proximal Enterocytes	c-0 Proximal Enterocytes	0	0
small intestine	c-1	1	Proximal Enterocytes	c-1 Proximal Enterocytes	0	0
small intestine	c-2	2	Proximal Enterocytes	c-2 Proximal Enterocytes	0	0
small intestine	c-3	3	Undifferentiated Cells	c-3 Undifferentiated Cells	0	0
small intestine	c-4	4	Proximal Enterocytes	c-4 Proximal Enterocytes	0	0
small intestine	c-5	5	Proximal Enterocytes	c-5 Proximal Enterocytes	0	0
small intestine	c-6	6	Proximal Enterocytes	c-6 Proximal Enterocytes	0	0
small intestine	c-7	7	Undifferentiated Cells	c-7 Undifferentiated Cells	0	0
small intestine	c-8	8	Undifferentiated Cells	c-8 Undifferentiated Cells	0	0
small intestine	c-9	9	Intestinal Goblet Cells	c-9 Intestinal Goblet Cells	0	0
small intestine	c-10	10	Intestinal Goblet Cells	c-10 Intestinal Goblet Cells	0	0
small intestine	c-11	11	Paneth Cells	c-11 Paneth Cells	0	0
spleen	c-0	0	B-Cells	c-0 B-Cells	0	0
spleen	c-1	1	T-Cells	c-1 T-Cells	0	0
spleen	c-2	2	T-Cells	c-2 T-Cells	0	0
spleen	c-3	3	Plasma Cells	c-3 Plasma Cells	0	0
spleen	c-4	4	T-Cells	c-4 T-Cells	0	0
spleen	c-5	5	Macrophages	c-5 Macrophages	0	0
spleen	c-6	6	T-Cells	c-6 T-Cells	0	0
spleen	c-7	7	T-Cells	c-7 T-Cells	0	0
stomach	c-0	0	B-Cells	c-0 B-Cells	0	0
stomach	c-1	1	T-Cells	c-1 T-Cells	0	0
stomach	c-2	2	T-Cells	c-2 T-Cells	0	0
stomach	c-3	3	T-Cells	c-3 T-Cells	0	0
stomach	c-4	4	T-Cells	c-4 T-Cells	0	0
stomach	c-5	5	Gastric Mucus-Secreting Cells	c-5 Gastric Mucus-Secreting Cells	0	0
stomach	c-6	6	Plasma Cells	c-6 Plasma Cells	0	0
stomach	c-7	7	Plasma Cells	c-7 Plasma Cells	0	0
stomach	c-8	8	Fibroblasts	c-8 Fibroblasts	0	0
stomach	c-9	9	Macrophages	c-9 Macrophages	0	0
testis	c-0	0	Leydig Cells	c-0 Leydig Cells	10.7	3.54844
testis	c-1	1	Late Spermatids	c-1 Late Spermatids	52.4	5.73877
testis	c-2	2	Spermatogonia	c-2 Spermatogonia	329.2	8.3672
testis	c-3	3	Late Spermatids	c-3 Late Spermatids	274.8	8.10748
testis	c-4	4	Late Spermatids	c-4 Late Spermatids	88	6.47573
testis	c-5	5	Early Spermatids	c-5 Early Spermatids	1175.6	10.2004
testis	c-6	6	Endothelial Cells	c-6 Endothelial Cells	7.4	3.07039
testis	c-7	7	Early Spermatids	c-7 Early Spermatids	1241.5	10.279
testis	c-8	8	Macrophages	c-8 Macrophages	8.6	3.26303
testis	c-9	9	Spermatocytes	c-9 Spermatocytes	663	9.37504
testis	c-10	10	Peritubular Cells	c-10 Peritubular Cells	12.3	3.73335
testis	c-11	11	Spermatogonia	c-11 Spermatogonia	287.3	8.17143
testis	c-12	12	Late Spermatids	c-12 Late Spermatids	143	7.16993
testis	c-13	13	Late Spermatids	c-13 Late Spermatids	178	7.48382
testis	c-14	14	Spermatocytes	c-14 Spermatocytes	528.2	9.04767
testis	c-15	15	Early Spermatids	c-15 Early Spermatids	483.1	8.91916
testis	c-16	16	Early Spermatids	c-16 Early Spermatids	659.1	9.36654
testis	c-17	17	Spermatocytes	c-17 Spermatocytes	1084.9	10.0847
testis	c-18	18	Late Spermatids	c-18 Late Spermatids	110.9	6.80607
testis	c-19	19	Spermatogonia	c-19 Spermatogonia	241.9	7.92422
testis	c-20	20	Sertoli Cells	c-20 Sertoli Cells	0	0
