# Supplementary material for: MAEL in human cancers and implications in prognostication and predicting benefit from immunotherapy over VEGFR/mTOR inhibitors in clear cell renal cell carcinoma: a bioinformatic analysis
Source: Aging (Albany NY). 2024 Jan 31;16(3):2090–122. doi: 10.18632/aging.205470 (PMC10911358; doi:10.18632/aging.205470)
Supplement: Supplementary Table 8 [file aging-16-205470-s007.xlsx]

## Sheet: Sheet1
Supplementary Table 8. Correlation between the mRNA expression of MAEL and other genes.
Correlated gene	Cytoband	Spearman's Rho	P value	Q-value	Group
ILDR2	1q24.1	0.597887	1.4195e-44	2.84355e-40	Positively correlated
RIT1	1q22	0.369823	6.67247e-16	6.68315e-12	Positively correlated
HOOK1	1p32.1	0.360662	3.79601e-15	2.53472e-11	Positively correlated
AMDHD1	12q23.1	0.352231	1.79114e-14	7.17603e-11	Positively correlated
NAPSA	19q13.33	0.349685	2.83566e-14	9.46732e-11	Positively correlated
TOMM20	1q42.3	0.339341	1.75797e-13	5.0308e-10	Positively correlated
ASB17	1p31.1	0.335003	3.70361e-13	9.04405e-10	Positively correlated
KCNJ3	2q24.1	0.332869	5.3199e-13	1.06568e-09	Positively correlated
PDZK1	1q21.1	0.332008	6.15233e-13	1.12039e-09	Positively correlated
A1CF	10q11.23	0.329952	8.68925e-13	1.45053e-09	Positively correlated
GABRB3	15q12	0.319098	5.15407e-12	7.37473e-09	Positively correlated
DARS1	2q21.3	0.317061	7.14228e-12	9.53828e-09	Positively correlated
DYRK3	1q32.1	0.315829	8.69007e-12	9.86385e-09	Positively correlated
PLCB1	20p12.3	0.31582	8.70184e-12	9.86385e-09	Positively correlated
KHDRBS1	1p35.2	0.315704	8.86328e-12	9.86385e-09	Positively correlated
PRXL2A	10q23.1	0.315012	9.89157e-12	1.00337e-08	Positively correlated
DPP4	2q24.2	0.314932	1.00176e-11	1.00337e-08	Positively correlated
KLHL32	6q16.1	0.308522	2.72953e-11	2.48536e-08	Positively correlated
BHMT	5q14.1	0.307889	3.00957e-11	2.6212e-08	Positively correlated
CDNF	10p13	0.307199	3.34696e-11	2.7936e-08	Positively correlated
MXI1	10q25.2	0.306026	4.00653e-11	3.21035e-08	Positively correlated
TSPAN12	7q31.31	0.305347	4.44502e-11	3.42472e-08	Positively correlated
ACAD11	3q22.1	0.304917	4.74593e-11	3.47664e-08	Positively correlated
FREM2	13q13.3	0.304667	4.93059e-11	3.47664e-08	Positively correlated
TMEM150C	4q21.22	0.304514	5.04622e-11	3.47664e-08	Positively correlated
MAP7	6q23.3	0.30391	5.5316e-11	3.47664e-08	Positively correlated
FMO2	1q24.3	0.303884	5.55373e-11	3.47664e-08	Positively correlated
CACHD1	1p31.3	0.30247	6.87928e-11	4.16654e-08	Positively correlated
ZNF804B	7q21.13	0.301365	8.12516e-11	4.60163e-08	Positively correlated
CCSER1	4q22.1	0.301248	8.2697e-11	4.60163e-08	Positively correlated
STK32B	4p16.2	0.300811	8.83077e-11	4.78103e-08	Positively correlated
GLRA2	Xp22.2	0.298487	1.24946e-10	6.58664e-08	Positively correlated
GYPA	4q31.21	0.298232	1.29763e-10	6.66514e-08	Positively correlated
SLC27A2	15q21.2	0.296394	1.7034e-10	8.53064e-08	Positively correlated
ZFAND1	8q21.13	0.296211	1.75005e-10	8.55047e-08	Positively correlated
EHHADH	3q27.2	0.295369	1.98073e-10	9.27035e-08	Positively correlated
RAVER2	1p31.3	0.295338	1.98994e-10	9.27035e-08	Positively correlated
TRPM3	9q21.12-q21.13	0.292818	2.87604e-10	1.22581e-07	Positively correlated
GIPC2	1p31.1	0.291792	3.33798e-10	1.39305e-07	Positively correlated
ALDH9A1	1q24.1	0.289543	4.61689e-10	1.77857e-07	Positively correlated
NPY6R	5q31.2	0.289229	4.83009e-10	1.82559e-07	Positively correlated
RBMX	Xq26.3	0.2888	5.13602e-10	1.90527e-07	Positively correlated
DMGDH	5q14.1	0.288596	5.28875e-10	1.92626e-07	Positively correlated
SLC47A1	17p11.2	0.287536	6.15234e-10	2.20078e-07	Positively correlated
ABRAXAS1	4q21.23	0.286982	6.65758e-10	2.29939e-07	Positively correlated
SLC22A8	11q12.3	0.285916	7.74399e-10	2.62928e-07	Positively correlated
SLITRK4	Xq27.3	0.284676	9.22658e-10	2.98108e-07	Positively correlated
CCNG1	5q34	0.284348	9.66249e-10	3.0608e-07	Positively correlated
TMIGD1	17q11.2	0.284263	9.77891e-10	3.0608e-07	Positively correlated
RALB	2q14.2	0.283995	1.01548e-09	3.12955e-07	Positively correlated
DMRTA1	9p21.3	0.283703	1.05793e-09	3.21097e-07	Positively correlated
CYS1	2p25.1	0.282763	1.20688e-09	3.55532e-07	Positively correlated
STEAP2	7q21.13	0.282348	1.27877e-09	3.71252e-07	Positively correlated
PDGFD	11q22.3	0.281149	1.51124e-09	4.2678e-07	Positively correlated
ANKRD46	8q22.3	0.281084	1.52503e-09	4.2678e-07	Positively correlated
PDZK1P1	1q21.2	0.279774	1.82842e-09	4.88358e-07	Positively correlated
SCGN	6p22.2	0.279305	1.95074e-09	5.14173e-07	Positively correlated
PBLD	10q21.3	0.278034	2.32336e-09	5.96686e-07	Positively correlated
GNE	9p13.3	0.275977	3.07744e-09	7.57609e-07	Positively correlated
MGAM	7q34	0.275745	3.17594e-09	7.59484e-07	Positively correlated
EPHA4	2q36.1	0.275725	3.18474e-09	7.59484e-07	Positively correlated
SLC17A4	6p22.2	0.275585	3.24576e-09	7.64931e-07	Positively correlated
DYNC2H1	11q22.3	0.275008	3.50997e-09	8.17578e-07	Positively correlated
LY6E-DT	8q24.3	0.274026	4.00879e-09	9.21818e-07	Positively correlated
ZNF711	Xq21.1	0.273951	4.04952e-09	9.21818e-07	Positively correlated
FANCC	9q22.32	0.273016	4.59296e-09	1.03378e-06	Positively correlated
LUZP2	11p14.3	0.271908	5.32885e-09	1.18608e-06	Positively correlated
CDR1	Xq27.1	0.27155	5.59034e-09	1.23061e-06	Positively correlated
CERKL	2q31.3	0.271215	5.84611e-09	1.27293e-06	Positively correlated
EIF4E3	3p13	0.270604	6.34236e-09	1.33737e-06	Positively correlated
UFSP2	4q35.1	0.270294	6.60934e-09	1.35955e-06	Positively correlated
SLC22A24	11q12.3	0.270157	6.73131e-09	1.35955e-06	Positively correlated
FAM8A1	6p22.3	0.270095	6.7869e-09	1.35955e-06	Positively correlated
FBXO3	11p13	0.269849	7.012e-09	1.36511e-06	Positively correlated
CMBL	5p15.2	0.269833	7.02693e-09	1.36511e-06	Positively correlated
SYDE2	1p22.3	0.268996	7.85085e-09	1.48054e-06	Positively correlated
RNASE4	14q11.2	0.26873	8.13212e-09	1.48054e-06	Positively correlated
DRAIC	15q23	0.268708	8.15548e-09	1.48054e-06	Positively correlated
SGCB	4q12	0.268607	8.2652e-09	1.48054e-06	Positively correlated
GPER1	7p22.3	0.268595	8.27775e-09	1.48054e-06	Positively correlated
PAIP2	5q31.2	0.268482	8.40293e-09	1.48962e-06	Positively correlated
MTCH1	6p21.2	0.268353	8.54701e-09	1.50187e-06	Positively correlated
DYNLRB2	16q23.2	0.267715	9.29587e-09	1.61926e-06	Positively correlated
ADCY5	3q21.1	0.267603	9.43392e-09	1.62179e-06	Positively correlated
KCNMB2	3q26.32	0.267572	9.4723e-09	1.62179e-06	Positively correlated
IFIT5	10q23.31	0.267398	9.69143e-09	1.63269e-06	Positively correlated
CYP4A11	1p33	0.267393	9.69896e-09	1.63269e-06	Positively correlated
HAO2	1p12	0.267282	9.84136e-09	1.64285e-06	Positively correlated
SLC10A2	13q33.1	0.267172	9.98404e-09	1.65289e-06	Positively correlated
MYLIP	6p22.3	0.266669	1.06649e-08	1.75113e-06	Positively correlated
DNAI7	12p12.1	0.266413	1.10279e-08	1.79466e-06	Positively correlated
PURA	5q31.3	0.266357	1.11091e-08	1.79466e-06	Positively correlated
PRKD1	14q12	0.266108	1.14769e-08	1.82465e-06	Positively correlated
KSR1	17q11.2	0.265974	1.168e-08	1.84231e-06	Positively correlated
SLC17A2	6p22.2	0.265688	1.21238e-08	1.89737e-06	Positively correlated
RLN2	9p24.1	0.265433	1.25339e-08	1.92039e-06	Positively correlated
SLC25A21	14q13.3	0.265418	1.25584e-08	1.92039e-06	Positively correlated
TRIQK	8q22.1	0.265201	1.2919e-08	1.96055e-06	Positively correlated
SWT1	1q25.3	0.264728	1.37392e-08	2.03093e-06	Positively correlated
DDAH1	1p22.3	0.26472	1.37539e-08	2.03093e-06	Positively correlated
AFF2	Xq28	0.2647	1.37883e-08	2.03093e-06	Positively correlated
TRHDE	12q21.1	0.264528	1.4101e-08	2.06184e-06	Positively correlated
RMND5A	2p11.2	0.264406	1.43254e-08	2.07434e-06	Positively correlated
SPATA18	4q12	0.263711	1.56754e-08	2.20781e-06	Positively correlated
EDNRB	13q22.3	0.263698	1.57023e-08	2.20781e-06	Positively correlated
CCDC158	4q21.1	0.263651	1.57976e-08	2.20781e-06	Positively correlated
KDR	4q12	0.263615	1.58709e-08	2.20781e-06	Positively correlated
B3GALNT1	3q26.1	0.263504	1.61014e-08	2.21015e-06	Positively correlated
LINC01622	6p25.3	0.263501	1.61083e-08	2.21015e-06	Positively correlated
IFIT1	10q23.31	0.262687	1.78931e-08	2.40561e-06	Positively correlated
TMEM252	9q21.11	0.262209	1.90285e-08	2.49137e-06	Positively correlated
ADSS1	14q32.33	0.261885	1.98362e-08	2.58025e-06	Positively correlated
SGSM1	22q11.23	0.261607	2.05577e-08	2.63982e-06	Positively correlated
SLC22A12	11q13.1	0.261531	2.07581e-08	2.64857e-06	Positively correlated
DIRAS2	9q22.2	0.261419	2.10597e-08	2.67006e-06	Positively correlated
FMO4	1q24.3	0.261047	2.20882e-08	2.75123e-06	Positively correlated
ZNF189	9q31.1	0.260962	2.23275e-08	2.75123e-06	Positively correlated
YES1	18p11.32	0.260894	2.25241e-08	2.75123e-06	Positively correlated
BBS7	4q27	0.26074	2.2972e-08	2.78894e-06	Positively correlated
ELP4	11p13	0.260576	2.34565e-08	2.8306e-06	Positively correlated
TRMT1L	1q25.3	0.260481	2.37435e-08	2.84809e-06	Positively correlated
FRMD3	9q21.32	0.259966	2.53552e-08	3.00542e-06	Positively correlated
SPATA6	1p33	0.259778	2.59704e-08	3.06023e-06	Positively correlated
KLF10	8q22.3	0.259616	2.65132e-08	3.09244e-06	Positively correlated
MTARC2	1q41	0.259604	2.65525e-08	3.09244e-06	Positively correlated
DENND11	7q34	0.259495	2.69226e-08	3.11741e-06	Positively correlated
CAMLG	5q31.1	0.259095	2.83271e-08	3.20191e-06	Positively correlated
AVPR1B	1q32.1	0.25901	2.86335e-08	3.20191e-06	Positively correlated
FBXO15	18q22.3	0.258994	2.86913e-08	3.20191e-06	Positively correlated
AMOT	Xq23	0.258972	2.87712e-08	3.20191e-06	Positively correlated
PAIP2B	2p13.3	0.258914	2.89847e-08	3.20786e-06	Positively correlated
CABP1	12q24.31	0.258683	2.98482e-08	3.24181e-06	Positively correlated
TMED8	14q24.3	0.258673	2.98835e-08	3.24181e-06	Positively correlated
RPL22	1p36.31	0.258659	2.99389e-08	3.24181e-06	Positively correlated
VIL1	2q35	0.258071	3.22514e-08	3.43649e-06	Positively correlated
ABCG2	4q22.1	0.257874	3.30623e-08	3.48828e-06	Positively correlated
FN3KRP	17q25.3	0.257869	3.30857e-08	3.48828e-06	Positively correlated
GPR160	3q26.2	0.257824	3.32722e-08	3.48958e-06	Positively correlated
DDIT4L	4q24	0.25774	3.36264e-08	3.49517e-06	Positively correlated
CXXC4	4q24	0.257688	3.3849e-08	3.49517e-06	Positively correlated
SHLD2	10q23.2	0.257305	3.55255e-08	3.63085e-06	Positively correlated
LHFPL3-AS2	7q22.3	0.256709	3.82906e-08	3.85446e-06	Positively correlated
WDR72	15q21.3	0.256245	4.05883e-08	4.06532e-06	Positively correlated
FBXL5	4p15.32	0.25579	4.29664e-08	4.26091e-06	Positively correlated
C1ORF43	1q21.3	0.255606	4.39727e-08	4.33922e-06	Positively correlated
SLC6A18	5p15.33	0.255553	4.42607e-08	4.34622e-06	Positively correlated
ARSF	Xp22.33	0.255293	4.57228e-08	4.42375e-06	Positively correlated
SLC25A44	1q22	0.255277	4.58134e-08	4.42375e-06	Positively correlated
DNAJC22	12q13.12	0.255257	4.59335e-08	4.42375e-06	Positively correlated
ITPRID2	2q31.3	0.255117	4.67381e-08	4.4797e-06	Positively correlated
BDNF	11p14.1	0.254908	4.79755e-08	4.57301e-06	Positively correlated
SLC16A4	1p13.3	0.254826	4.84668e-08	4.57301e-06	Positively correlated
C1QL4	12q13.12	0.254822	4.84937e-08	4.57301e-06	Positively correlated
SLC6A3	5p15.33	0.254688	4.93097e-08	4.57301e-06	Positively correlated
FLT1	13q12.3	0.254104	5.30246e-08	4.82813e-06	Positively correlated
TMEM38B	9q31.2	0.253592	5.65065e-08	5.12189e-06	Positively correlated
ERICH5	8q22.2	0.253483	5.72754e-08	5.14502e-06	Positively correlated
DHDH	19q13.33	0.25312	5.99104e-08	5.3577e-06	Positively correlated
RAB21	12q21.1	0.25296	6.11128e-08	5.44094e-06	Positively correlated
FAM172A	5q15	0.252263	6.66027e-08	5.80124e-06	Positively correlated
GHR	5p13.1-p12	0.252263	6.66077e-08	5.80124e-06	Positively correlated
ADD3	10q25.1-q25.2	0.252093	6.80159e-08	5.85415e-06	Positively correlated
DNM1	9q34.11	0.251967	6.90807e-08	5.88475e-06	Positively correlated
AQP4	18q11.2	0.25193	6.93931e-08	5.88475e-06	Positively correlated
IFT88	13q12.11	0.251878	6.98421e-08	5.88475e-06	Positively correlated
PEX19	1q23.2	0.251658	7.1761e-08	5.98807e-06	Positively correlated
LRRK2	12q12	0.251403	7.40433e-08	6.11471e-06	Positively correlated
KLF11	2p25.1	0.251323	7.47754e-08	6.13893e-06	Positively correlated
ACAA2	18q21.1	0.251281	7.51653e-08	6.14576e-06	Positively correlated
HNMT	2q22.1	0.251137	7.6499e-08	6.17915e-06	Positively correlated
STXBP1	9q34.11	0.250839	7.93465e-08	6.35787e-06	Positively correlated
ABHD17B	9q21.13	0.250493	8.27909e-08	6.60573e-06	Positively correlated
EIF4B	12q13.13	0.250042	8.74844e-08	6.89956e-06	Positively correlated
PAH	12q23.2	0.249998	8.79551e-08	6.90948e-06	Positively correlated
TAF9B	Xq21.1	0.249896	8.90579e-08	6.94166e-06	Positively correlated
KIAA1614	1q25.3	0.249758	9.05712e-08	7.03225e-06	Positively correlated
SULT1C4	2q12.3	0.249702	9.11921e-08	7.05313e-06	Positively correlated
ANXA13	8q24.13	0.249555	9.28394e-08	7.15292e-06	Positively correlated
INPP5F	10q26.11	0.249095	9.81887e-08	7.50731e-06	Positively correlated
SALL2	14q11.2	0.24855	1.0491e-07	7.96044e-06	Positively correlated
USP51	Xp11.21	0.248409	1.06718e-07	8.03674e-06	Positively correlated
SNX4	3q21.2	0.248329	1.07761e-07	8.08487e-06	Positively correlated
UCN3	10p15.1	0.2482	1.09459e-07	8.10049e-06	Positively correlated
SLC22A6	11q12.3	0.248191	1.09586e-07	8.10049e-06	Positively correlated
POLR3C	1q21.1	0.248048	1.11494e-07	8.21121e-06	Positively correlated
B4GAT1	11q13.2	0.247897	1.13559e-07	8.33268e-06	Positively correlated
PRKAA2	1p32.2	0.247671	1.16695e-07	8.53148e-06	Positively correlated
PEX11A	15q26.1	0.247547	1.1847e-07	8.59855e-06	Positively correlated
STEAP1	7q21.13	0.247499	1.19151e-07	8.61674e-06	Positively correlated
DUSP11	2p13.1	0.247381	1.20865e-07	8.65538e-06	Positively correlated
C1ORF115	1q41	0.247198	1.23571e-07	8.80914e-06	Positively correlated
NR1H4	12q23.1	0.246971	1.27e-07	8.98961e-06	Positively correlated
PLS1	3q23	0.246845	1.28937e-07	9.06853e-06	Positively correlated
KHK	2p23.3	0.246732	1.30698e-07	9.12246e-06	Positively correlated
ZFYVE9	1p32.3	0.246318	1.37383e-07	9.45725e-06	Positively correlated
AFM	4q13.3	0.24623	1.3884e-07	9.5248e-06	Positively correlated
SLC5A10	17p11.2	0.246201	1.39323e-07	9.52534e-06	Positively correlated
TMEM220	17p13.1	0.245632	1.49179e-07	9.99449e-06	Positively correlated
GBA3	4p15.2	0.245419	1.53035e-07	1.02186e-05	Positively correlated
EFNB2	13q33.3	0.245391	1.53548e-07	1.02188e-05	Positively correlated
ADGRV1	5q14.3	0.245342	1.5444e-07	1.02442e-05	Positively correlated
GPRASP2	Xq22.1	0.245167	1.57717e-07	1.0427e-05	Positively correlated
PLPP3	1p32.2	0.245024	1.60434e-07	1.05371e-05	Positively correlated
GATM	15q21.1	0.2449	1.62839e-07	1.06601e-05	Positively correlated
NPR3	5p13.3	0.244703	1.66715e-07	1.08783e-05	Positively correlated
F11	4q35.2	0.244333	1.7423e-07	1.13317e-05	Positively correlated
STARD3NL	7p14-p13	0.244115	1.78828e-07	1.15931e-05	Positively correlated
GJB1	Xq13.1	0.244043	1.80352e-07	1.16542e-05	Positively correlated
NRXN2	11q13.1	0.243861	1.84308e-07	1.17957e-05	Positively correlated
IMPA2	18p11.21	0.243728	1.8725e-07	1.18703e-05	Positively correlated
LINC01550	14q32.2	0.243631	1.89409e-07	1.19692e-05	Positively correlated
GET1	21q22.2	0.243356	1.95713e-07	1.22901e-05	Positively correlated
SIRT1	10q21.3	0.243182	1.99785e-07	1.24676e-05	Positively correlated
SLC6A13	12p13.33	0.24315	2.00543e-07	1.2476e-05	Positively correlated
SUGCT	7p14.1	0.243121	2.01244e-07	1.24808e-05	Positively correlated
PTPRB	12q15	0.24303	2.03411e-07	1.25763e-05	Positively correlated
ALDH7A1	5q23.2	0.242661	2.12508e-07	1.30581e-05	Positively correlated
GID4	17p11.2	0.242471	2.17347e-07	1.32741e-05	Positively correlated
ST13P4	13q14.2	0.242403	2.19082e-07	1.32989e-05	Positively correlated
EHBP1	2p15	0.242309	2.21528e-07	1.3397e-05	Positively correlated
C2ORF73	2p16.2	0.241957	2.30945e-07	1.38512e-05	Positively correlated
ANK3	10q21.2	0.241883	2.32971e-07	1.3931e-05	Positively correlated
TBC1D15	12q21.1	0.241827	2.345e-07	1.39807e-05	Positively correlated
ALDH3A2	17p11.2	0.241634	2.39899e-07	1.42601e-05	Positively correlated
PBX1	1q23.3	0.241412	2.46248e-07	1.45942e-05	Positively correlated
TRIL	7p14.3	0.241363	2.47683e-07	1.4636e-05	Positively correlated
ERO1B	1q42.3	0.241035	2.57414e-07	1.50614e-05	Positively correlated
MYNN	3q26.2	0.241002	2.58431e-07	1.50614e-05	Positively correlated
ENAM	4q13.3	0.240684	2.68253e-07	1.5486e-05	Positively correlated
ALDH1L1	3q21.3	0.240639	2.6968e-07	1.55237e-05	Positively correlated
AGMAT	1p36.21	0.240274	2.81458e-07	1.60632e-05	Positively correlated
UNC5D	8p12	0.24014	2.85899e-07	1.62556e-05	Positively correlated
ZNF658	9q21.11	0.239888	2.94468e-07	1.64311e-05	Positively correlated
CABLES1	18q11.2	0.239745	2.99406e-07	1.66289e-05	Positively correlated
USP27X	Xp11.23	0.239738	2.99673e-07	1.66289e-05	Positively correlated
COQ8A	1q42.13	0.239587	3.04989e-07	1.68307e-05	Positively correlated
METTL25	12q21.31	0.23935	3.13543e-07	1.71609e-05	Positively correlated
THRA	17q21.1	0.239279	3.16153e-07	1.72566e-05	Positively correlated
SPTLC3	20p12.1	0.239019	3.25875e-07	1.77389e-05	Positively correlated
METAP2	12q22	0.238331	3.53015e-07	1.89587e-05	Positively correlated
ADH5	4q23	0.238292	3.54643e-07	1.89952e-05	Positively correlated
SEPTIN10	2q13	0.238226	3.57354e-07	1.90894e-05	Positively correlated
IQSEC3	12p13.33	0.237845	3.73506e-07	1.97676e-05	Positively correlated
LIFR	5p13.1	0.237783	3.76166e-07	1.98299e-05	Positively correlated
SUCNR1	3q25.1	0.237712	3.79299e-07	1.98904e-05	Positively correlated
EMCN	4q24	0.237533	3.8725e-07	2.02543e-05	Positively correlated
SLCO4C1	5q21.1	0.23718	4.03366e-07	2.07718e-05	Positively correlated
TGFBR3	1p22.1	0.236699	4.26384e-07	2.17337e-05	Positively correlated
CALCRL	2q32.1	0.236303	4.46273e-07	2.25751e-05	Positively correlated
TOR1AIP1	1q25.2	0.235847	4.70292e-07	2.36706e-05	Positively correlated
METTL24	6q21	0.23571	4.77738e-07	2.39665e-05	Positively correlated
TCEA3	1p36.12	0.235695	4.78564e-07	2.39665e-05	Positively correlated
SERP2	13q14.11	0.235292	5.01205e-07	2.48518e-05	Positively correlated
ING3	7q31.31	0.235225	5.05079e-07	2.49205e-05	Positively correlated
AQP3	9p13.3	0.235055	5.14986e-07	2.52848e-05	Positively correlated
C6ORF223	6p21.1	0.23492	5.23004e-07	2.55532e-05	Positively correlated
BEX2	Xq22.2	0.234583	5.43548e-07	2.63003e-05	Positively correlated
CLIC4	1p36.11	0.234498	5.48866e-07	2.64937e-05	Positively correlated
CALCOCO2	17q21.32	0.234064	5.76691e-07	2.77033e-05	Positively correlated
ST6GALNAC3	1p31.1	0.233767	5.96499e-07	2.84396e-05	Positively correlated
SLC10A5	8q21.13	0.23375	5.97698e-07	2.84396e-05	Positively correlated
LRP2	2q31.1	0.233597	6.08188e-07	2.86995e-05	Positively correlated
GLYATL1	11q12.1	0.233587	6.0889e-07	2.86995e-05	Positively correlated
HNRNPK	9q21.32	0.233538	6.12227e-07	2.87891e-05	Positively correlated
MYOT	5q31.2	0.233505	6.1457e-07	2.88315e-05	Positively correlated
CTXN3	5q23.2	0.233394	6.22385e-07	2.913e-05	Positively correlated
MYCT1	6q25.2	0.233223	6.34588e-07	2.96319e-05	Positively correlated
EXOC8	1q42.2	0.23314	6.40568e-07	2.98415e-05	Positively correlated
EDA	Xq13.1	0.232957	6.53977e-07	3.03955e-05	Positively correlated
PLIN2	9p22.1	0.232817	6.6442e-07	3.08094e-05	Positively correlated
EIF2S3	Xp22.11	0.232674	6.75271e-07	3.12403e-05	Positively correlated
KCNV1	8q23.2	0.232588	6.81875e-07	3.12501e-05	Positively correlated
MBLAC2	5q14.3	0.232578	6.82667e-07	3.12501e-05	Positively correlated
ESM1	5q11.2	0.23257	6.83284e-07	3.12501e-05	Positively correlated
AARD	8q24.11	0.232457	6.92063e-07	3.15723e-05	Positively correlated
APOLD1	12p13.1	0.232439	6.93481e-07	3.15723e-05	Positively correlated
PPP1R21	2p16.3	0.232417	6.95255e-07	3.15813e-05	Positively correlated
TXNDC16	14q22.1	0.232343	7.01048e-07	3.16185e-05	Positively correlated
GAS2L3	12q23.1	0.232311	7.03598e-07	3.16185e-05	Positively correlated
ST13	22q13.2	0.232267	7.07146e-07	3.16185e-05	Positively correlated
NOSTRIN	2q24.3	0.232266	7.072e-07	3.16185e-05	Positively correlated
ENPP4	6p21.1	0.232257	7.07909e-07	3.16185e-05	Positively correlated
TRIM55	8q13.1	0.232208	7.11858e-07	3.16185e-05	Positively correlated
EXOSC2	9q34.12	0.232051	7.24607e-07	3.20635e-05	Positively correlated
CLIC5	6p21.1	0.232045	7.25078e-07	3.20635e-05	Positively correlated
SMTNL2	17p13.2	0.231839	7.4212e-07	3.26811e-05	Positively correlated
TMEM200A	6q23.1	0.231488	7.72103e-07	3.36966e-05	Positively correlated
GGH	8q12.3	0.231315	7.87281e-07	3.3985e-05	Positively correlated
DTWD2	5q23.1	0.231302	7.88408e-07	3.3985e-05	Positively correlated
NLRP14	11p15.4	0.231297	7.88889e-07	3.3985e-05	Positively correlated
ID4	6p22.3	0.230873	8.27392e-07	3.51896e-05	Positively correlated
BHMT2	5q14.1	0.230753	8.38549e-07	3.54427e-05	Positively correlated
MTSS1	8q24.13	0.230132	8.9907e-07	3.77572e-05	Positively correlated
MATR3	5q31.2	0.230096	9.0265e-07	3.78282e-05	Positively correlated
SAP30L	5q33.2	0.22999	9.13456e-07	3.82012e-05	Positively correlated
SLC16A12	10q23.31	0.229891	9.23574e-07	3.85438e-05	Positively correlated
UTP4	16q22.1	0.22976	9.37204e-07	3.90313e-05	Positively correlated
LDB2	4p15.32	0.229623	9.51681e-07	3.94701e-05	Positively correlated
PATJ	1p31.3	0.229571	9.57216e-07	3.96177e-05	Positively correlated
ATP11A	13q34	0.229548	9.59633e-07	3.96358e-05	Positively correlated
EGOT	3p26.1	0.229505	9.64273e-07	3.97455e-05	Positively correlated
ANG	14q11.2	0.229406	9.75046e-07	4.00036e-05	Positively correlated
ACLY	17q21.2	0.229392	9.76525e-07	4.00036e-05	Positively correlated
PEG10	7q21.3	0.22896	1.02466e-06	4.18899e-05	Positively correlated
LYRM9	17q11.2	0.228916	1.0297e-06	4.201e-05	Positively correlated
HLF	17q22	0.228809	1.04202e-06	4.24265e-05	Positively correlated
ENPP2	8q24.12	0.228562	1.07104e-06	4.33768e-05	Positively correlated
PGRMC1	Xq24	0.228536	1.07423e-06	4.33768e-05	Positively correlated
DGKB	7p21.2	0.228523	1.07574e-06	4.33768e-05	Positively correlated
RO60	1q31.2	0.228512	1.07705e-06	4.33768e-05	Positively correlated
TTC30A	2q31.2	0.228382	1.09275e-06	4.378e-05	Positively correlated
PAQR5	15q23	0.228327	1.09934e-06	4.38401e-05	Positively correlated
MAPT	17q21.31	0.228314	1.10101e-06	4.38401e-05	Positively correlated
CYB5A	18q22.3	0.228298	1.10301e-06	4.38401e-05	Positively correlated
MB21D2	3q29	0.228115	1.12562e-06	4.46505e-05	Positively correlated
POLR1E	9p13.2	0.227998	1.14031e-06	4.49786e-05	Positively correlated
RMDN2	2p22.2	0.227995	1.14063e-06	4.49786e-05	Positively correlated
TINAG	6p12.1	0.227724	1.17544e-06	4.60413e-05	Positively correlated
DNM3	1q24.3	0.227487	1.20668e-06	4.70276e-05	Positively correlated
ZHX1	8q24.13	0.227461	1.2101e-06	4.70695e-05	Positively correlated
TEX9	15q21.3	0.227101	1.25923e-06	4.84162e-05	Positively correlated
CLTRN	Xp22.2	0.22703	1.26915e-06	4.87044e-05	Positively correlated
RABGGTB	1p31.1	0.226901	1.28732e-06	4.92131e-05	Positively correlated
USP30	12q24.11	0.22676	1.30751e-06	4.97949e-05	Positively correlated
SMU1	9p21.1	0.226426	1.35655e-06	5.10796e-05	Positively correlated
PHOSPHO2	2q31.1	0.226305	1.37465e-06	5.1664e-05	Positively correlated
GOLPH3L	1q21.3	0.226143	1.3994e-06	5.21428e-05	Positively correlated
WAC	10p12.1	0.226141	1.39971e-06	5.21428e-05	Positively correlated
RAG1	11p12	0.226011	1.41984e-06	5.27685e-05	Positively correlated
IL1RL2	2q12.1	0.225721	1.46567e-06	5.41703e-05	Positively correlated
HAAO	2p21	0.225688	1.47105e-06	5.42691e-05	Positively correlated
FAM50B	6p25.2	0.225209	1.55038e-06	5.64213e-05	Positively correlated
COL19A1	6q13	0.225187	1.55404e-06	5.64213e-05	Positively correlated
RUNDC3B	7q21.12	0.225111	1.56703e-06	5.67255e-05	Positively correlated
PABPC4L	4q28.3	0.225035	1.5802e-06	5.70351e-05	Positively correlated
HNRNPU	1q44	0.224986	1.58855e-06	5.71308e-05	Positively correlated
CDC73	1q31.2	0.224851	1.61214e-06	5.78752e-05	Positively correlated
C8ORF37	8q22.1	0.224774	1.62579e-06	5.81568e-05	Positively correlated
UTP18	17q21.33	0.224514	1.67259e-06	5.94066e-05	Positively correlated
RPS6KA5	14q32.11	0.22448	1.67896e-06	5.9422e-05	Positively correlated
ADH6	4q23	0.224281	1.71567e-06	6.04687e-05	Positively correlated
CTXN2	15q21.1	0.224271	1.71759e-06	6.04687e-05	Positively correlated
BNIP3	10q26.3	0.224222	1.7267e-06	6.06829e-05	Positively correlated
TRIM10	6p22.1	0.224194	1.73207e-06	6.07651e-05	Positively correlated
NADK2	5p13.2	0.224056	1.75825e-06	6.1361e-05	Positively correlated
SLC2A2	3q26.2	0.224037	1.76196e-06	6.13836e-05	Positively correlated
F8	Xq28	0.223824	1.80315e-06	6.2564e-05	Positively correlated
NMD3	3q26.1	0.223799	1.8081e-06	6.2564e-05	Positively correlated
RGS5	1q23.3	0.223798	1.80833e-06	6.2564e-05	Positively correlated
MCC	5q22.2	0.223713	1.82515e-06	6.30109e-05	Positively correlated
WDFY3-AS2	4q21.23	0.223701	1.82754e-06	6.30109e-05	Positively correlated
CEP43	6q27	0.223638	1.84006e-06	6.3225e-05	Positively correlated
MYT1	20q13.33	0.22357	1.85368e-06	6.35837e-05	Positively correlated
PLEKHF2	8q22.1	0.223538	1.86022e-06	6.35904e-05	Positively correlated
EFHC2	Xp11.3	0.223452	1.87749e-06	6.40715e-05	Positively correlated
GAREM1	18q12.1	0.223356	1.89729e-06	6.46319e-05	Positively correlated
SLC16A9	10q21.2	0.223341	1.90037e-06	6.46319e-05	Positively correlated
SEC62	3q26.2	0.223304	1.90803e-06	6.47823e-05	Positively correlated
MAPT-AS1	17q21.31	0.22314	1.94232e-06	6.58351e-05	Positively correlated
XPR1	1q25.3	0.22305	1.96117e-06	6.63616e-05	Positively correlated
PODXL	7q32.3	0.222857	2.00262e-06	6.73094e-05	Positively correlated
PRKCE	2p21	0.2228	2.01502e-06	6.76127e-05	Positively correlated
NTN4	12q22	0.222776	2.02039e-06	6.76232e-05	Positively correlated
PMM1	22q13.2	0.22239	2.10655e-06	6.98648e-05	Positively correlated
FZD5	2q33.3	0.222336	2.11879e-06	7.0094e-05	Positively correlated
CPNE3	8q21.3	0.222323	2.12167e-06	7.0094e-05	Positively correlated
INSYN2B	5q35.1	0.222313	2.12395e-06	7.0094e-05	Positively correlated
PIFO	1p13.2	0.222195	2.15126e-06	7.0762e-05	Positively correlated
LHFPL3	7q22.2-q22.3	0.222117	2.16957e-06	7.12473e-05	Positively correlated
TRDMT1	10p13	0.222079	2.17842e-06	7.13907e-05	Positively correlated
MANEA	6q16.1	0.222052	2.18463e-06	7.13907e-05	Positively correlated
CA4	17q23.1	0.221727	2.26257e-06	7.35777e-05	Positively correlated
MACO1	1p36.11	0.221695	2.27035e-06	7.37109e-05	Positively correlated
WDR89	14q23.2	0.221637	2.28471e-06	7.40572e-05	Positively correlated
ZNF148	3q21.2	0.221618	2.28939e-06	7.4089e-05	Positively correlated
CFAP36	2p16.1	0.221321	2.36354e-06	7.5691e-05	Positively correlated
SETD3	14q32.2	0.221314	2.36534e-06	7.5691e-05	Positively correlated
GDF6	8q22.1	0.22118	2.39986e-06	7.65508e-05	Positively correlated
BLOC1S5	6p24.3	0.22115	2.40742e-06	7.667e-05	Positively correlated
PCOLCE2	3q23	0.221127	2.41346e-06	7.67404e-05	Positively correlated
BBIP1	10q25.2	0.22099	2.44912e-06	7.75053e-05	Positively correlated
EEF1A1P9	4q24	0.220873	2.48012e-06	7.8239e-05	Positively correlated
DNAJC16	1p36.21	0.220841	2.48856e-06	7.83817e-05	Positively correlated
PANK1	10q23.31	0.220659	2.53778e-06	7.97045e-05	Positively correlated
SPAAR	9p13.3	0.220655	2.53883e-06	7.97045e-05	Positively correlated
TTLL7	1p31.1	0.220641	2.54249e-06	7.97045e-05	Positively correlated
SRSF12	6q15	0.220553	2.56668e-06	8.03372e-05	Positively correlated
KIAA0825	5q15	0.2204	2.60904e-06	8.1282e-05	Positively correlated
GABRG1	4p12	0.220292	2.63938e-06	8.18454e-05	Positively correlated
GPR89A	1q21.1	0.220227	2.65773e-06	8.21337e-05	Positively correlated
EGLN1	1q42.2	0.220216	2.66098e-06	8.21337e-05	Positively correlated
ACADM	1p31.1	0.219815	2.77737e-06	8.48115e-05	Positively correlated
MAPK1	22q11.22	0.219365	2.91391e-06	8.81745e-05	Positively correlated
RNF19B	1p35.1	0.219287	2.93826e-06	8.8777e-05	Positively correlated
FCRLB	1q23.3	0.219268	2.94433e-06	8.88267e-05	Positively correlated
MOAP1	14q32.12	0.219205	2.96416e-06	8.9268e-05	Positively correlated
PPP6C	9q33.3	0.219125	2.98944e-06	8.97819e-05	Positively correlated
ATP13A4	3q29	0.219013	3.02532e-06	9.05876e-05	Positively correlated
CAVIN2	2q32.3	0.218936	3.05003e-06	9.11496e-05	Positively correlated
NPM1	5q35.1	0.218916	3.05672e-06	9.11496e-05	Positively correlated
TCN2	22q12.2	0.218913	3.05774e-06	9.11496e-05	Positively correlated
PSIP1	9p22.3	0.218867	3.0725e-06	9.14536e-05	Positively correlated
EEF1AKMT3	12q14.1	0.218787	3.0988e-06	9.20478e-05	Positively correlated
SLC3A1	2p21	0.218778	3.10165e-06	9.20478e-05	Positively correlated
COX11	17q22	0.21876	3.10778e-06	9.20934e-05	Positively correlated
SPAG9	17q21.33	0.218706	3.12567e-06	9.24867e-05	Positively correlated
RPRD2	1q21.2	0.218599	3.16113e-06	9.3398e-05	Positively correlated
SFXN2	10q24.32	0.218508	3.19207e-06	9.41732e-05	Positively correlated
SYF2	1p36.11	0.218444	3.21388e-06	9.4326e-05	Positively correlated
VAMP3	1p36.23	0.218437	3.21614e-06	9.4326e-05	Positively correlated
COL25A1	4q25	0.218423	3.2208e-06	9.4326e-05	Positively correlated
VPS37D	7q11.23	0.218361	3.24222e-06	9.48148e-05	Positively correlated
PLSCR4	3q24	0.218287	3.2678e-06	9.54235e-05	Positively correlated
GABPA	21q21.3	0.218144	3.31756e-06	9.61399e-05	Positively correlated
DHX9	1q25.3	0.218109	3.3297e-06	9.61399e-05	Positively correlated
FSIP1	15q14	0.218107	3.33073e-06	9.61399e-05	Positively correlated
ASXL3	18q12.1	0.218064	3.34586e-06	9.62218e-05	Positively correlated
HOXA4	7p15.2	0.218058	3.34797e-06	9.62218e-05	Positively correlated
AGTR1	3q24	0.218028	3.35849e-06	9.63857e-05	Positively correlated
MPL	1p34.2	0.217825	3.43144e-06	9.81981e-05	Positively correlated
SERINC1	6q22.31	0.217602	3.51352e-06	9.99756e-05	Positively correlated
GNL1	6p21.33	0.217478	3.55972e-06	0.000101003	Positively correlated
CD36	7q21.11	0.217421	3.58111e-06	0.000101467	Positively correlated
PLPBP	8p11.23	0.216973	3.75435e-06	0.000105777	Positively correlated
EIF4EBP2	10q22.1	0.2166	3.90481e-06	0.000108986	Positively correlated
PKHD1	6p12.3-p12.2	0.216596	3.90634e-06	0.000108986	Positively correlated
KL	13q13.1	0.216524	3.93617e-06	0.00010962	Positively correlated
PCYOX1	2p13.3	0.216409	3.98399e-06	0.000110537	Positively correlated
CRYZ	1p31.1	0.216293	4.03251e-06	0.000111266	Positively correlated
TPRG1L	1p36.32	0.216256	4.04849e-06	0.000111438	Positively correlated
HPGD	4q34.1	0.216233	4.05819e-06	0.000111466	Positively correlated
EEF1A1	6q13	0.216224	4.062e-06	0.000111466	Positively correlated
PPM1D	17q23.3	0.216188	4.07757e-06	0.00011174	Positively correlated
CYYR1	21q21.3	0.215857	4.22129e-06	0.000115049	Positively correlated
VEPH1	3q25.31-q25.32	0.215782	4.25454e-06	0.000115744	Positively correlated
GRM8	7q31.33	0.215763	4.26338e-06	0.000115744	Positively correlated
EMC2	8q23.1	0.215761	4.26413e-06	0.000115744	Positively correlated
RAB3IP	12q15	0.215635	4.32061e-06	0.000116878	Positively correlated
THNSL1	10p12.1	0.215629	4.32339e-06	0.000116878	Positively correlated
TMEM14A	6p12.2	0.215591	4.34063e-06	0.000116986	Positively correlated
LTA4H	12q23.1	0.215586	4.3429e-06	0.000116986	Positively correlated
CDK18	1q32.1	0.215569	4.35075e-06	0.000116986	Positively correlated
SLC33A1	3q25.31	0.215374	4.44033e-06	0.000118915	Positively correlated
EIF2A	3q25.1	0.215231	4.50699e-06	0.000120379	Positively correlated
NEK11	3q22.1	0.215081	4.57813e-06	0.000122116	Positively correlated
SERTAD4	1q32.2	0.21503	4.60276e-06	0.000122447	Positively correlated
AGXT2	5p13.2	0.214905	4.66301e-06	0.000123558	Positively correlated
CES4A	16q22.1	0.214838	4.696e-06	0.000124103	Positively correlated
DDC	7p12.2-p12.1	0.214807	4.71134e-06	0.000124318	Positively correlated
SOWAHC	2q13	0.214796	4.71654e-06	0.000124318	Positively correlated
SEH1L	18p11.21	0.214421	4.90441e-06	0.00012809	Positively correlated
PRX	19q13.2	0.214215	5.01048e-06	0.00013052	Positively correlated
MIGA1	1p31.1	0.214168	5.03502e-06	0.000130592	Positively correlated
WDSUB1	2q24.2	0.213948	5.15188e-06	0.000132993	Positively correlated
RIDA	8q22.2	0.213728	5.27088e-06	0.000135715	Positively correlated
SYT9	11p15.4	0.213613	5.3337e-06	0.000137156	Positively correlated
TOM1L1	17q22	0.213493	5.40071e-06	0.000137929	Positively correlated
RBM8A	1q21.1	0.213491	5.4015e-06	0.000137929	Positively correlated
MYO9A	15q23	0.213266	5.52901e-06	0.000140199	Positively correlated
MYL3	3p21.31	0.213185	5.57587e-06	0.000141208	Positively correlated
GEMIN5	5q33.2	0.213015	5.67472e-06	0.000142809	Positively correlated
CHMP4C	8q21.13	0.212979	5.69551e-06	0.000143152	Positively correlated
CLDN10	13q32.1	0.212938	5.71985e-06	0.000143553	Positively correlated
CRYM	16p12.2	0.212805	5.79925e-06	0.000144851	Positively correlated
PIGM	1q23.2	0.212763	5.82406e-06	0.000145165	Positively correlated
CCNYL1	2q33.3	0.212748	5.83354e-06	0.000145165	Positively correlated
C11ORF54	11q21	0.212687	5.87003e-06	0.000145589	Positively correlated
PJA2	5q21.3	0.212683	5.87278e-06	0.000145589	Positively correlated
CFAP52	17p13.1	0.212671	5.87965e-06	0.000145589	Positively correlated
SDE2	1q42.12	0.212569	5.94225e-06	0.000146776	Positively correlated
TMEM159	16p12.3	0.21246	6.00928e-06	0.000147884	Positively correlated
FAM184A	6q22.31	0.212419	6.03443e-06	0.000148203	Positively correlated
CDC14B	9q22.32-q22.33	0.212403	6.04454e-06	0.000148206	Positively correlated
SLC22A11	11q13.1	0.212333	6.08865e-06	0.000148923	Positively correlated
RNF2	1q25.3	0.212114	6.22728e-06	0.000151758	Positively correlated
TMEM37	2q14.2	0.211968	6.32183e-06	0.000153688	Positively correlated
KYAT1	9q34.11	0.211912	6.3579e-06	0.000154317	Positively correlated
HEY2	6q22.31	0.211897	6.36813e-06	0.000154317	Positively correlated
HNRNPDL	4q21.22	0.211893	6.37083e-06	0.000154317	Positively correlated
ALAD	9q32	0.211614	6.55586e-06	0.000157259	Positively correlated
TAF1B	2p25.1	0.211611	6.55809e-06	0.000157259	Positively correlated
IL6R	1q21.3	0.21161	6.55863e-06	0.000157259	Positively correlated
BMP4	14q22.2	0.211596	6.56821e-06	0.000157259	Positively correlated
MAP3K13	3q27.2	0.21158	6.57863e-06	0.000157259	Positively correlated
RORA	15q22.2	0.211565	6.58913e-06	0.000157322	Positively correlated
TNFRSF19	13q12.12	0.211535	6.60952e-06	0.000157621	Positively correlated
ZNF704	8q21.13	0.211463	6.6582e-06	0.000158593	Positively correlated
ADORA2A-AS1	22q11.23	0.211094	6.91466e-06	0.000163729	Positively correlated
PCBP2	12q13.13	0.211002	6.9802e-06	0.000164697	Positively correlated
TESK2	1p34.1	0.210985	6.99234e-06	0.000164789	Positively correlated
PREPL	2p21	0.210945	7.02107e-06	0.000165271	Positively correlated
LGALS2	22q13.1	0.210545	7.31459e-06	0.000171725	Positively correlated
STRADB	2q33.1	0.210462	7.37665e-06	0.000172829	Positively correlated
ADGRL4	1p31.1	0.210429	7.40171e-06	0.000173214	Positively correlated
TSHZ1	18q22.3	0.210335	7.4731e-06	0.000174564	Positively correlated
TLL1	4q32.3	0.21033	7.47681e-06	0.000174564	Positively correlated
CRIP3	6p21.1	0.209974	7.75337e-06	0.00018018	Positively correlated
KIAA0895	7p14.2	0.209908	7.80596e-06	0.000181192	Positively correlated
PCNP	3q12.3	0.209789	7.90066e-06	0.000183012	Positively correlated
EMX2OS	10q26.11	0.209764	7.92098e-06	0.000183225	Positively correlated
MOB3B	9p21.2	0.209649	8.01409e-06	0.000184952	Positively correlated
CTDSPL2	15q15.3-q21.1	0.209585	8.06686e-06	0.000185742	Positively correlated
FAM161B	14q24.3	0.209573	8.07619e-06	0.000185743	Positively correlated
AMBP	9q32	0.209298	8.30517e-06	0.000190515	Positively correlated
AK7	14q32.2	0.209253	8.34345e-06	0.000190794	Positively correlated
BTBD3	20p12.2	0.209119	8.45741e-06	0.00019296	Positively correlated
CYP4V2	4q35.1-q35.2	0.208989	8.57014e-06	0.000195096	Positively correlated
SKIDA1	10p12.31	0.208901	8.64626e-06	0.000196597	Positively correlated
MAPK3	16p11.2	0.208724	8.80347e-06	0.000199267	Positively correlated
RNF157	17q25.1	0.208685	8.83828e-06	0.000199581	Positively correlated
FMO1	1q24.3	0.208675	8.84724e-06	0.000199581	Positively correlated
FUT3	19p13.3	0.208612	8.90338e-06	0.000200396	Positively correlated
STK19	6p21.33	0.208568	8.94316e-06	0.000201066	Positively correlated
MASP1	3q27.3	0.208465	9.03711e-06	0.00020295	Positively correlated
RIPOR2	6p22.3	0.208445	9.05499e-06	0.000203124	Positively correlated
NEK5	13q14.3	0.208405	9.09168e-06	0.000203719	Positively correlated
RAET1E	6q25.1	0.208189	9.29233e-06	0.000207287	Positively correlated
ACADSB	10q26.13	0.208121	9.35657e-06	0.000208488	Positively correlated
TLN2	15q22.2	0.208047	9.42667e-06	0.000209205	Positively correlated
BEX5	Xq22.1	0.208034	9.43929e-06	0.000209205	Positively correlated
FDPS	1q22	0.208029	9.44419e-06	0.000209205	Positively correlated
TSNAX	1q42.2	0.208021	9.45142e-06	0.000209205	Positively correlated
TLR3	4q35.1	0.207965	9.50479e-06	0.000210154	Positively correlated
SMAD5	5q31.1	0.20779	9.67449e-06	0.00021335	Positively correlated
OPCML	11q25	0.207768	9.69575e-06	0.000213434	Positively correlated
APLN	Xq26.1	0.207617	9.84419e-06	0.000216227	Positively correlated
ZNF833P	19p13.2	0.207545	9.91674e-06	0.000216525	Positively correlated
SARAF	8p12	0.207539	9.92262e-06	0.000216525	Positively correlated
MIOX	22q13.33	0.207503	9.95877e-06	0.000217077	Positively correlated
MTRR	5p15.31	0.207483	9.97832e-06	0.000217267	Positively correlated
CGRRF1	14q22.2	0.206859	1.06243e-05	0.000230082	Positively correlated
IFIT3	10q23.31	0.206822	1.06643e-05	0.00023045	Positively correlated
MMRN2	10q23.2	0.206656	1.08431e-05	0.000233136	Positively correlated
ADGRB3	6q12-q13	0.206652	1.08468e-05	0.000233136	Positively correlated
EXOC3	5p15.33	0.206602	1.09022e-05	0.000233826	Positively correlated
GOLGA5	14q32.12	0.20652	1.09922e-05	0.000235081	Positively correlated
MMADHC	2q23.2	0.206509	1.10042e-05	0.000235081	Positively correlated
FTCD	21q22.3	0.206506	1.10077e-05	0.000235081	Positively correlated
EMX2	10q26.11	0.206468	1.10489e-05	0.000235458	Positively correlated
CEP68	2p14	0.206378	1.11491e-05	0.00023709	Positively correlated
THAP10	15q23	0.206286	1.12527e-05	0.000239039	Positively correlated
RAPGEF4	2q31.1	0.206169	1.13845e-05	0.000241583	Positively correlated
GHDC	17q21.2	0.205857	1.17458e-05	0.000247937	Positively correlated
FAM227B	15q21.2	0.205782	1.18344e-05	0.000249543	Positively correlated
GNG11	7q21.3	0.205767	1.18515e-05	0.000249641	Positively correlated
WWC2-AS2	4q35.1	0.205699	1.19325e-05	0.000250557	Positively correlated
SLC25A42	19p13.11	0.205609	1.20397e-05	0.000252543	Positively correlated
NME7	1q24.2	0.205557	1.2103e-05	0.000253255	Positively correlated
RAB4A	1q42.13	0.205547	1.21147e-05	0.000253255	Positively correlated
H2AC6	6p22.2	0.205533	1.21313e-05	0.000253255	Positively correlated
SCN4A	17q23.3	0.205521	1.21461e-05	0.000253255	Positively correlated
CHIC1	Xq13.2	0.205518	1.21495e-05	0.000253255	Positively correlated
ZNRF3	22q12.1	0.205435	1.2251e-05	0.000255106	Positively correlated
HMGN4	6p22.2	0.205403	1.22902e-05	0.000255391	Positively correlated
DNMBP-AS1	10q24.2	0.205254	1.24739e-05	0.000257962	Positively correlated
LCLAT1	2p23.1	0.20525	1.24783e-05	0.000257962	Positively correlated
CLVS2	6q22.31	0.205236	1.24959e-05	0.00025806	Positively correlated
LZIC	1p36.22	0.205155	1.25974e-05	0.000259888	Positively correlated
SERPINA7	Xq22.3	0.205099	1.26672e-05	0.00026106	Positively correlated
SHE	1q21.3	0.20485	1.29855e-05	0.000266795	Positively correlated
SMARCA1	Xq25-q26.1	0.204838	1.30011e-05	0.000266843	Positively correlated
NUDT12	5q21.2	0.204758	1.31041e-05	0.000268367	Positively correlated
TTC19	17p12	0.204601	1.3311e-05	0.000271257	Positively correlated
ARL3	10q24.32	0.204586	1.33307e-05	0.000271382	Positively correlated
TMEM18	2p25.3	0.204332	1.3671e-05	0.000277464	Positively correlated
LRRC19	9p21.2	0.204259	1.37701e-05	0.000279194	Positively correlated
ZSWIM5	1p34.1	0.204212	1.38338e-05	0.0002802	Positively correlated
MED21	12p11.23	0.204156	1.39117e-05	0.000281493	Positively correlated
STX12	1p35.3	0.204078	1.40191e-05	0.000283095	Positively correlated
FUT6	19p13.3	0.204064	1.40382e-05	0.000283196	Positively correlated
ASPA	17p13.2	0.203876	1.43019e-05	0.000287358	Positively correlated
ALDH6A1	14q24.3	0.203708	1.45417e-05	0.000291298	Positively correlated
NAT8B	2p13.1	0.203654	1.46198e-05	0.000292572	Positively correlated
TFPI	2q32.1	0.203517	1.48183e-05	0.000295952	Positively correlated
ASB9	Xp22.2	0.203475	1.488e-05	0.000296889	Positively correlated
ALDH8A1	6q23.3	0.20329	1.51539e-05	0.000300856	Positively correlated
RORC	1q21	0.203258	1.52015e-05	0.000300906	Positively correlated
UTP25	1q32.2	0.203247	1.52188e-05	0.00030095	Positively correlated
AQP1	7p14.3	0.203162	1.53462e-05	0.00030317	Positively correlated
XYLB	3p22.2	0.203113	1.54212e-05	0.000304053	Positively correlated
SLC5A8	12q23.1-q23.2	0.20297	1.56402e-05	0.000307162	Positively correlated
ALDOB	9q31.1	0.202898	1.57513e-05	0.000309041	Positively correlated
GABRQ	Xq28	0.202452	1.64569e-05	0.000320374	Positively correlated
MTHFR	1p36.22	0.20237	1.65909e-05	0.000322043	Positively correlated
HTR6	1p36.13	0.202217	1.68412e-05	0.00032577	Positively correlated
SORBS2	4q35.1	0.202159	1.69384e-05	0.000326888	Positively correlated
PECR	2q35	0.202049	1.71207e-05	0.000329454	Positively correlated
UFL1	6q16.1	0.201992	1.72176e-05	0.000331002	Positively correlated
TYW3	1p31.1	0.201892	1.73875e-05	0.000333626	Positively correlated
CCDC110	4q35.1	0.201759	1.76152e-05	0.000336706	Positively correlated
PDK2	17q21.33	0.201666	1.77762e-05	0.00033887	Positively correlated
CNBP	3q21.3	0.201654	1.77961e-05	0.00033887	Positively correlated
MPZL2	11q23.3	0.201534	1.80069e-05	0.000342096	Positively correlated
WIPF2	17q21.2	0.201492	1.80817e-05	0.000343005	Positively correlated
CEP120	5q23.2	0.201466	1.81272e-05	0.000343542	Positively correlated
SNHG29	17p11.2	0.201334	1.83628e-05	0.00034735	Positively correlated
MRPS18B	6p21.33	0.201315	1.8396e-05	0.000347649	Positively correlated
BPHL	6p25.2	0.201296	1.84314e-05	0.00034799	Positively correlated
ACMSD	2q21.3	0.201105	1.87768e-05	0.000352518	Positively correlated
FAM163A	1q25.2	0.201041	1.8895e-05	0.000354069	Positively correlated
STAG2	Xq25	0.200946	1.90702e-05	0.000355893	Positively correlated
LRRC70	5q12.1	0.200934	1.90929e-05	0.000355893	Positively correlated
KCNH6	17q23.3	0.200931	1.90987e-05	0.000355893	Positively correlated
NAB1	2q32.2	0.200872	1.92096e-05	0.000357627	Positively correlated
AGMO	7p21.2	0.20085	1.92499e-05	0.000358044	Positively correlated
VWF	12p13.31	0.200693	1.95477e-05	0.000362574	Positively correlated
TMEM170B	6p24.2	0.200668	1.95944e-05	0.000363103	Positively correlated
CILK1	6p12.1	0.200615	1.96952e-05	0.000364369	Positively correlated
CYB5D1	17p13.1	0.20055	1.98205e-05	0.000366278	Positively correlated
POLR2C	16q21	0.200497	1.99238e-05	0.000367847	Positively correlated
TEK	9p21.2	0.200448	2.00181e-05	0.000369246	Positively correlated
LARGE2	11p11.2	0.200387	2.01368e-05	0.000370419	Positively correlated
FAM76A	1p35.3	0.200383	2.01446e-05	0.000370419	Positively correlated
RBBP8	18q11.2	0.200378	2.01556e-05	0.000370419	Positively correlated
TCEAL8	Xq22.1	0.200269	2.03701e-05	0.000373675	Positively correlated
PLD1	3q26.31	0.200189	2.05297e-05	0.000375915	Positively correlated
SLC13A2	17q11.2	0.200158	2.05918e-05	0.0003767	Positively correlated
UBR7	14q32.12	0.200146	2.06139e-05	0.0003767	Positively correlated
PDE7B	6q23.3	0.199945	2.10207e-05	0.000382112	Positively correlated
LPA	6q25.3-q26	0.19992	2.10728e-05	0.000382365	Positively correlated
LRATD2	8q24.21	0.199819	2.12795e-05	0.000385069	Positively correlated
PEX11B	1q21.1	0.199647	2.16363e-05	0.000390116	Positively correlated
CFL2	14q13.1	0.199606	2.17231e-05	0.000391329	Positively correlated
PPP1R15B	1q32.1	0.199506	2.19353e-05	0.000394441	Positively correlated
HUNK	21q22.11	0.19944	2.2075e-05	0.000396598	Positively correlated
PWWP3B	Xq22.3	0.199345	2.22781e-05	0.00039953	Positively correlated
IRF2BP2	1q42.3	0.199321	2.2331e-05	0.000400121	Positively correlated
ANP32E	1q21.2	0.199296	2.2385e-05	0.000400729	Positively correlated
AACSP1	5q35.3	0.199239	2.25079e-05	0.000402199	Positively correlated
CCDC160	Xq26.2	0.199212	2.25675e-05	0.000402199	Positively correlated
BBOX1	11p14.2	0.199183	2.263e-05	0.000402955	Positively correlated
LGALSL	2p14	0.199108	2.27963e-05	0.000405195	Positively correlated
TGFBR2	3p24.1	0.199076	2.28672e-05	0.000405735	Positively correlated
NMRK1	9q21.13	0.198987	2.30637e-05	0.000408498	Positively correlated
KCNAB1	3q25.31	0.198902	2.32536e-05	0.000411498	Positively correlated
UBA5	3q22.1	0.198782	2.35233e-05	0.000414805	Positively correlated
TMEM245	9q31.3	0.198655	2.38143e-05	0.000417953	Positively correlated
CES3	16q22.1	0.198645	2.38362e-05	0.000417953	Positively correlated
SCGB1D2	11q12.3	0.198581	2.39838e-05	0.000419969	Positively correlated
EPAS1	2p21	0.198558	2.40373e-05	0.000420537	Positively correlated
GABRB1	4p12	0.198322	2.45914e-05	0.00042836	Positively correlated
HMGN2	1p36.11	0.198301	2.46412e-05	0.000428834	Positively correlated
ZNF496	1q44	0.198191	2.49017e-05	0.000431514	Positively correlated
LYSMD3	5q14.3	0.197957	2.54681e-05	0.000439555	Positively correlated
PLVAP	19p13.11	0.197954	2.54754e-05	0.000439555	Positively correlated
CALCR	7q21.3	0.197896	2.56181e-05	0.000441636	Positively correlated
SYNM	15q26.3	0.197623	2.62985e-05	0.000452445	Positively correlated
FATE1	Xq28	0.197573	2.64248e-05	0.000453592	Positively correlated
LBR	1q42.12	0.197482	2.66569e-05	0.000456403	Positively correlated
RNF20	9q31.1	0.197461	2.67114e-05	0.000456945	Positively correlated
AKR1C3	10p15.1	0.19736	2.69698e-05	0.000460973	Positively correlated
ARHGAP29	1p22.1	0.197335	2.70346e-05	0.000461292	Positively correlated
EDN1	6p24.1	0.197311	2.70968e-05	0.00046196	Positively correlated
RDX	11q22.3	0.197236	2.72922e-05	0.000464896	Positively correlated
NAPEPLD	7q22.1	0.19722	2.73342e-05	0.000465215	Positively correlated
CLCN5	Xp11.23	0.197183	2.7432e-05	0.00046578	Positively correlated
SOWAHB	4q21.1	0.197148	2.7523e-05	0.000466843	Positively correlated
ALDH5A1	6p22.3	0.197134	2.75585e-05	0.000467049	Positively correlated
ACTR10	14q23.1	0.1971	2.76506e-05	0.000468214	Positively correlated
CLEC18B	16q23.1	0.197041	2.78065e-05	0.000470456	Positively correlated
SHMT1	17p11.2	0.196966	2.80068e-05	0.000472907	Positively correlated
IPO4	14q12	0.19696	2.80222e-05	0.000472907	Positively correlated
SFTPD	10q22.3	0.196922	2.8124e-05	0.000474095	Positively correlated
TCL6	14q32.13	0.196916	2.81399e-05	0.000474095	Positively correlated
MTO1	6q13	0.19679	2.84797e-05	0.000479014	Positively correlated
INSR	19p13.2	0.196747	2.85982e-05	0.000480232	Positively correlated
SPATA7	14q31.3	0.196677	2.87905e-05	0.000482123	Positively correlated
CSDE1	1p13.2	0.196671	2.8806e-05	0.000482123	Positively correlated
AR	Xq12	0.19667	2.88089e-05	0.000482123	Positively correlated
PEX5	12p13.31	0.196582	2.90517e-05	0.000485374	Positively correlated
DISP1	1q41	0.196554	2.91292e-05	0.000485859	Positively correlated
SNX27	1q21.3	0.196503	2.9271e-05	0.000487413	Positively correlated
ZNF33B	10q11.21	0.196441	2.94464e-05	0.000489439	Positively correlated
CNBD2	20q11.23	0.196411	2.95311e-05	0.000489439	Positively correlated
CENPS	1p36.22	0.196327	2.97679e-05	0.000492282	Positively correlated
ZNF614	19q13.41	0.196263	2.99492e-05	0.000494593	Positively correlated
SLK	10q24.33-q25.1	0.196088	3.04513e-05	0.000501381	Positively correlated
S1PR1	1p21.2	0.196067	3.05121e-05	0.000501616	Positively correlated
TRIP4	15q22.31	0.196063	3.05247e-05	0.000501616	Positively correlated
LIN7A	12q21.31	0.195936	3.08959e-05	0.000506343	Positively correlated
IGBP1	Xq13.1	0.19593	3.09134e-05	0.000506343	Positively correlated
PDE9A	21q22.3	0.19573	3.15072e-05	0.000515648	Positively correlated
SLC22A9	11q12.3	0.195598	3.19049e-05	0.000521305	Positively correlated
TNN	1q25.1	0.195461	3.23225e-05	0.00052657	Positively correlated
SLU7	5q33.3	0.195265	3.29291e-05	0.000534551	Positively correlated
PIP4K2B	17q12	0.195193	3.31549e-05	0.000536542	Positively correlated
RBMXL1	1p22.2	0.195174	3.32125e-05	0.000536542	Positively correlated
SMPDL3A	6q22.31	0.194965	3.38773e-05	0.000544647	Positively correlated
FAM171A1	10p13	0.194848	3.42539e-05	0.00054982	Positively correlated
GCLM	1p22.1	0.194742	3.45998e-05	0.000554483	Positively correlated
PRUNE2	9q21.2	0.194584	3.51202e-05	0.000561475	Positively correlated
TRHDE-AS1	12q21.1	0.194529	3.5304e-05	0.000563204	Positively correlated
HNF4G	8q21.13	0.194526	3.53127e-05	0.000563204	Positively correlated
TM4SF18	3q25.1	0.194379	3.58058e-05	0.000568353	Positively correlated
RIOK2	5q15	0.19426	3.621e-05	0.00057386	Positively correlated
ARHGAP32	11q24.3	0.194134	3.66434e-05	0.000580269	Positively correlated
MID2	Xq22.3	0.194125	3.66724e-05	0.000580269	Positively correlated
TMEM174	5q13.2	0.194046	3.69488e-05	0.000584182	Positively correlated
HSP90AB1	6p21.1	0.19403	3.70045e-05	0.000584601	Positively correlated
TAL2	9q31.2	0.194004	3.70924e-05	0.000584623	Positively correlated
APEX1	14q11.2	0.193978	3.7184e-05	0.00058559	Positively correlated
DENND2C	1p13.2	0.193929	3.73568e-05	0.00058735	Positively correlated
SLC5A1	22q12.3	0.193904	3.74454e-05	0.00058735	Positively correlated
RGL1	1q25.3	0.193884	3.75151e-05	0.00058735	Positively correlated
MANSC1	12p13.2	0.193774	3.79045e-05	0.000591819	Positively correlated
TRAM1L1	4q26	0.193628	3.843e-05	0.00059909	Positively correlated
DDO	6q21	0.193601	3.85261e-05	0.000600121	Positively correlated
STARD8	Xq13.1	0.193563	3.8666e-05	0.000601831	Positively correlated
TMCC3	12q22	0.193394	3.92822e-05	0.000608114	Positively correlated
KIAA1958	9q32	0.193315	3.9575e-05	0.000611512	Positively correlated
RNF5	6p21.32	0.193214	3.99532e-05	0.000615175	Positively correlated
EDAR	2q13	0.193129	4.02728e-05	0.000619619	Positively correlated
SH3YL1	2p25.3	0.193006	4.07393e-05	0.000626316	Positively correlated
NMT2	10p13	0.192967	4.0889e-05	0.000627655	Positively correlated
DPYS	8q22.3	0.192897	4.11564e-05	0.000630793	Positively correlated
SLC22A2	6q25.3	0.192853	4.13262e-05	0.00063291	Positively correlated
SLC6A19	5p15.33	0.192803	4.15211e-05	0.000635409	Positively correlated
CCDC87	11q13.2	0.192729	4.18098e-05	0.000639339	Positively correlated
ZNF670	1q44	0.192637	4.21711e-05	0.000644372	Positively correlated
ADAM18	8p11.22	0.1926	4.23168e-05	0.00064557	Positively correlated
DIAPH2	Xq21.33	0.192598	4.23266e-05	0.00064557	Positively correlated
NUCKS1	1q32.1	0.192593	4.23462e-05	0.00064557	Positively correlated
ZNF24	18q12.2	0.192523	4.26242e-05	0.000648328	Positively correlated
DNAJC1	10p12.31	0.192422	4.30264e-05	0.000653949	Positively correlated
MAT2B	5q34	0.192399	4.31211e-05	0.000654891	Positively correlated
GPANK1	6p21.33	0.192348	4.33245e-05	0.000657482	Positively correlated
ITGA1	5q11.2	0.192256	4.36995e-05	0.00066217	Positively correlated
CLEC14A	14q21.1	0.192218	4.38532e-05	0.000663996	Positively correlated
PHAX	5q23.2	0.19219	4.39704e-05	0.000665268	Positively correlated
DDX59	1q32.1	0.192139	4.41809e-05	0.000667949	Positively correlated
BSPRY	9q32	0.192118	4.42677e-05	0.000668252	Positively correlated
MTHFD1	14q23.3	0.192063	4.44953e-05	0.000670677	Positively correlated
ECI2	6p25.2	0.192001	4.47522e-05	0.00067303	Positively correlated
LRPPRC	2p21	0.191857	4.53584e-05	0.000679596	Positively correlated
DDX1	2p24.3	0.191806	4.55735e-05	0.000682308	Positively correlated
TUSC1	9p21.2	0.191748	4.58192e-05	0.00068502	Positively correlated
PROS1	3q11.1	0.191735	4.58732e-05	0.00068502	Positively correlated
CFAP206	6q15	0.191731	4.58914e-05	0.00068502	Positively correlated
IRF6	1q32.2	0.191704	4.60051e-05	0.000685695	Positively correlated
TUFT1	1q21.3	0.191693	4.60532e-05	0.000685902	Positively correlated
BNIP3L	8p21.2	0.191663	4.61824e-05	0.000687098	Positively correlated
CTBP2	10q26.13	0.191659	4.62021e-05	0.000687098	Positively correlated
YME1L1	10p12.1	0.191575	4.65623e-05	0.00069194	Positively correlated
TMEM176A	7q36.1	0.191392	4.73598e-05	0.000701544	Positively correlated
ABI3BP	3q12.2	0.191338	4.75979e-05	0.000703677	Positively correlated
SLC25A30	13q14.13	0.19129	4.7811e-05	0.000706306	Positively correlated
MTFR1	8q13.1	0.191262	4.79355e-05	0.000706582	Positively correlated
SLC4A4	4q13.3	0.191198	4.82248e-05	0.000710229	Positively correlated
SESTD1	2q31.2	0.191189	4.82611e-05	0.000710229	Positively correlated
TMEM64	8q21.3	0.191178	4.83121e-05	0.000710229	Positively correlated
EPHX1	1q42.12	0.191175	4.83248e-05	0.000710229	Positively correlated
ETNK2	1q32.1	0.190972	4.92462e-05	0.000720599	Positively correlated
ZMYND12	1p34.2	0.190945	4.93683e-05	0.000721468	Positively correlated
LRRC58	3q13.33	0.190904	4.95556e-05	0.000723014	Positively correlated
KIAA1549	7q34	0.190863	4.97436e-05	0.000724805	Positively correlated
WDR31	9q32	0.190862	4.97508e-05	0.000724805	Positively correlated
RAMP3	7p13	0.19076	5.02216e-05	0.000730602	Positively correlated
SLC34A1	5q35.3	0.190736	5.03318e-05	0.000731674	Positively correlated
PPP2R3A	3q22.2-q22.3	0.190703	5.04862e-05	0.000732855	Positively correlated
QRFPR	4q27	0.190686	5.05688e-05	0.000733522	Positively correlated
Positively correlatedB1	22q11.23	0.190611	5.09202e-05	0.000737551	Positively correlated
ADCY9	16p13.3	0.190536	5.12745e-05	0.000740913	Positively correlated
CIB4	2p23.3	0.190362	5.2106e-05	0.000752008	Positively correlated
ODAD4	17q21.2	0.190308	5.23653e-05	0.000755207	Positively correlated
EXOC3L2	19q13.32	0.190258	5.26081e-05	0.000758162	Positively correlated
ACOX2	3p14.3	0.190142	5.3177e-05	0.000764711	Positively correlated
RBBP5	1q32.1	0.190124	5.32651e-05	0.000765428	Positively correlated
GOSR1	17q11.2	0.189959	5.40798e-05	0.000776022	Positively correlated
SMIM10	Xq26.3	0.189838	5.46859e-05	0.000783037	Positively correlated
TGFA	2p13.3	0.189753	5.51168e-05	0.000787518	Positively correlated
TTC33	5p13.1	0.18969	5.54375e-05	0.000791535	Positively correlated
PCDH17	13q21.1	0.189676	5.55125e-05	0.000791946	Positively correlated
POC1B	12q21.33	0.189658	5.56028e-05	0.000792202	Positively correlated
DNAJC18	5q31.2	0.189644	5.56746e-05	0.00079266	Positively correlated
NONO	Xq13.1	0.189564	5.60863e-05	0.000796258	Positively correlated
CD2AP	6p12.3	0.189541	5.62055e-05	0.000797385	Positively correlated
G6PC1	17q21.31	0.189496	5.64378e-05	0.000799548	Positively correlated
CANX	5q35.3	0.189473	5.65606e-05	0.000800341	Positively correlated
PPM1A	14q23.1	0.18947	5.65737e-05	0.000800341	Positively correlated
PFKP	10p15.2	0.189432	5.67718e-05	0.000802012	Positively correlated
PCBP1	2p13.3	0.189363	5.71343e-05	0.000806206	Positively correlated
MTAP	9p21.3	0.18936	5.71492e-05	0.000806206	Positively correlated
TFEC	7q31.2	0.189321	5.73536e-05	0.000807826	Positively correlated
STOM	9q33.2	0.189315	5.7385e-05	0.000807826	Positively correlated
MYLK4	6p25.2	0.1893	5.7465e-05	0.000808384	Positively correlated
ZFP1	16q23.1	0.189215	5.79154e-05	0.000813578	Positively correlated
ARID4A	14q23.1	0.189153	5.82449e-05	0.000817633	Positively correlated
APC	5q22.2	0.189041	5.88482e-05	0.000823793	Positively correlated
FBXL4	6q16.1-q16.2	0.189031	5.89016e-05	0.000823964	Positively correlated
AGT	1q42.2	0.189004	5.90477e-05	0.000825432	Positively correlated
OR10K2	1q23.1	0.1889	5.96183e-05	0.000831088	Positively correlated
AKR7A2	1p36.13	0.188851	5.98832e-05	0.000832464	Positively correlated
ATP6V1C1	8q22.3	0.188754	6.04215e-05	0.000838306	Positively correlated
MTM1	Xq28	0.188727	6.05667e-05	0.000839054	Positively correlated
ASH1L	1q22	0.188588	6.13437e-05	0.000847561	Positively correlated
UCHL5	1q31.2	0.188582	6.13768e-05	0.000847561	Positively correlated
TMTC1	12p11.22	0.188572	6.14346e-05	0.000847561	Positively correlated
TARS3	15q26.3	0.188551	6.15523e-05	0.0008486	Positively correlated
ARHGEF28	5q13.2	0.188515	6.17589e-05	0.000850862	Positively correlated
RHOB	2p24.1	0.18847	6.20145e-05	0.000853797	Positively correlated
BLMH	17q11.2	0.188306	6.29467e-05	0.000862551	Positively correlated
CTSO	4q32.1	0.188306	6.29518e-05	0.000862551	Positively correlated
IL1RL1	2q12.1	0.188243	6.33106e-05	0.000865692	Positively correlated
UGT2A3	4q13.2	0.188221	6.34392e-05	0.000866858	Positively correlated
SIPA1L1	14q24.2	0.188156	6.38164e-05	0.000870824	Positively correlated
LEPR	1p31.3	0.188048	6.44529e-05	0.000878911	Positively correlated
HIPK2	7q34	0.188035	6.45302e-05	0.000879366	Positively correlated
P3H2	3q28	0.188009	6.4683e-05	0.000880252	Positively correlated
PLG	6q26	0.188	6.47369e-05	0.000880387	Positively correlated
SCN4B	11q23.3	0.187991	6.47866e-05	0.000880465	Positively correlated
FBXO48	2p13.3	0.187979	6.4858e-05	0.000880771	Positively correlated
CCDC149	4p15.2	0.187869	6.55138e-05	0.000887788	Positively correlated
SLC1A1	9p24.2	0.187858	6.55781e-05	0.000887788	Positively correlated
DOK6	18q22.2	0.187766	6.6134e-05	0.000893322	Positively correlated
SLC7A13	8q21.3	0.187715	6.64418e-05	0.000896271	Positively correlated
PKDREJ	22q13.31	0.187679	6.6656e-05	0.000898555	Positively correlated
SLC39A8	4q24	0.187617	6.70344e-05	0.000903049	Positively correlated
LINC00473	6q27	0.187432	6.81745e-05	0.00091779	Positively correlated
GIN1	5q21.1	0.187401	6.83673e-05	0.000919626	Positively correlated
ZNF395	8p21.1	0.187354	6.86647e-05	0.000922326	Positively correlated
SLC13A1	7q31.32	0.187307	6.89544e-05	0.00092518	Positively correlated
BLZF1	1q24.2	0.187263	6.92333e-05	0.00092768	Positively correlated
CUL4B	Xq24	0.187213	6.95496e-05	0.000931296	Positively correlated
TNFAIP6	2q23.3	0.187205	6.95997e-05	0.000931344	Positively correlated
SCAPER	15q24.3	0.187158	6.98948e-05	0.000934668	Positively correlated
PIK3R3	1p34.1	0.186913	7.14689e-05	0.000951905	Positively correlated
GAB1	4q31.21	0.186905	7.15225e-05	0.000951986	Positively correlated
APPBP2	17q23.2	0.186823	7.20598e-05	0.000957229	Positively correlated
ATE1	10q26.13	0.186719	7.27391e-05	0.00096262	Positively correlated
EPB41L5	2q14.2	0.186697	7.28834e-05	0.000963697	Positively correlated
AQP4-AS1	18q11.2	0.186633	7.33114e-05	0.00096744	Positively correlated
DHX40	17q23.1	0.186578	7.36784e-05	0.000971643	Positively correlated
STAG1	3q22.3	0.186551	7.38593e-05	0.000972868	Positively correlated
B3GNT9	16q22.1	0.186529	7.40034e-05	0.000973629	Positively correlated
RNF38	9p13.2	0.186519	7.40697e-05	0.000973629	Positively correlated
UGT3A1	5p13.2	0.186508	7.41466e-05	0.000973629	Positively correlated
HIBCH	2q32.2	0.186503	7.41801e-05	0.000973629	Positively correlated
PTPN3	9q31	0.186498	7.42105e-05	0.000973629	Positively correlated
ENPP5	6p21.1	0.186497	7.42178e-05	0.000973629	Positively correlated
LAMA1	18p11.31	0.186479	7.43421e-05	0.000973989	Positively correlated
RCAN1	21q22.12	0.186479	7.43425e-05	0.000973989	Positively correlated
HMGCS2	1p12	0.186438	7.46166e-05	0.000976304	Positively correlated
NCKAP1	2q32.1	0.186429	7.46799e-05	0.000976493	Positively correlated
ENPP3	6q23.2	0.186369	7.50863e-05	0.000981167	Positively correlated
DEK	6p22.3	0.186034	7.73981e-05	0.00100547	Positively correlated
PYROXD1	12p12.1	0.185946	7.80151e-05	0.00101283	Positively correlated
SPRY2	13q31.1	0.185912	7.82562e-05	0.00101394	Positively correlated
HMCN1	1q25.3-q31.1	0.185901	7.83332e-05	0.00101394	Positively correlated
RGCC	13q14.11	0.185898	7.83538e-05	0.00101394	Positively correlated
PTK2	8q24.3	0.185876	7.85076e-05	0.00101528	Positively correlated
ANO4	12q23.1	0.1858	7.90488e-05	0.00102096	Positively correlated
MPI	15q24.1	0.185788	7.91372e-05	0.00102144	Positively correlated
SLC22A4	5q31.1	0.185678	7.99241e-05	0.00102762	Positively correlated
CD34	1q32.2	0.185629	8.02745e-05	0.00103147	Positively correlated
MAPK8IP1	11p11.2	0.185514	8.11121e-05	0.0010409	Positively correlated
TMEM125	1p34.2	0.185446	8.1612e-05	0.00104664	Positively correlated
AKR1C4	10p15.1	0.185437	8.16784e-05	0.00104682	Positively correlated
UBE3D	6q14.1	0.185421	8.17953e-05	0.00104765	Positively correlated
DCTN3	9p13.3	0.185381	8.20903e-05	0.00104992	Positively correlated
SFXN1	5q35.2	0.18534	8.23925e-05	0.00105261	Positively correlated
FGFBP2	4p15.32	0.185316	8.25743e-05	0.00105426	Positively correlated
C5ORF24	5q31.1	0.185264	8.29629e-05	0.00105652	Positively correlated
ST8SIA4	5q21.1	0.185251	8.3058e-05	0.00105706	Positively correlated
NUS1	6q22.1	0.185168	8.36852e-05	0.00106117	Positively correlated
FAM241A	4q25	0.185161	8.37367e-05	0.00106117	Positively correlated
AFTPH	2p14	0.185062	8.44869e-05	0.00106846	Positively correlated
CYP4Z2P	1p33	0.185023	8.47798e-05	0.00107149	Positively correlated
RSBN1	1p13.2	0.18501	8.48798e-05	0.00107186	Positively correlated
SLC28A1	15q25.3	0.185005	8.49159e-05	0.00107186	Positively correlated
BCL2	18q21.33	0.184917	8.55923e-05	0.00107768	Positively correlated
ALMS1P1	2p13.1	0.184899	8.57306e-05	0.00107806	Positively correlated
NAF1	4q32.2	0.18487	8.59541e-05	0.0010802	Positively correlated
CYP4Z1	1p33	0.184846	8.61432e-05	0.00108189	Positively correlated
PAX6	11p13	0.184813	8.63986e-05	0.00108442	Positively correlated
ARMT1	6q25.1	0.184622	8.78863e-05	0.00110167	Positively correlated
AP1AR	4q25	0.184611	8.79781e-05	0.00110167	Positively correlated
RAPGEF5	7p15.3	0.184611	8.79802e-05	0.00110167	Positively correlated
NSA2	5q13.3	0.184609	8.79925e-05	0.00110167	Positively correlated
CHST9	18q11.2	0.184545	8.85006e-05	0.0011062	Positively correlated
RASEF	9q21.32	0.184433	8.93954e-05	0.00111505	Positively correlated
SNRNP48	6p24.3	0.184409	8.9581e-05	0.00111667	Positively correlated
MIR1915HG	10p12.31	0.184377	8.98458e-05	0.00111858	Positively correlated
VIRMA	8q22.1	0.184309	9.03924e-05	0.00112399	Positively correlated
ENO1	1p36.23	0.184248	9.08844e-05	0.0011287	Positively correlated
PIP4P2	8q21.3	0.184218	9.1133e-05	0.00113109	Positively correlated
SLC22A10	11q12.3	0.18412	9.1937e-05	0.00113825	Positively correlated
DSEL	18q22.1	0.184038	9.26093e-05	0.00114493	Positively correlated
ZNF280D	15q21.3	0.183909	9.36824e-05	0.00115628	Positively correlated
SERPINA6	14q32.13	0.183877	9.39497e-05	0.00115887	Positively correlated
TOPORS	9p21.1	0.183864	9.40592e-05	0.0011595	Positively correlated
ZNF366	5q13.1	0.183636	9.59971e-05	0.00118044	Positively correlated
PRODH2	19q13.12	0.183626	9.60863e-05	0.00118044	Positively correlated
ZFP37	9q32	0.183558	9.66693e-05	0.00118657	Positively correlated
GDI2	10p15.1	0.183531	9.69017e-05	0.00118869	Positively correlated
KBTBD7	13q14.11	0.183505	9.71224e-05	0.00119067	Positively correlated
ZNF346	5q35.2	0.183492	9.72391e-05	0.00119137	Positively correlated
KLHL20	1q25.1	0.183464	9.74816e-05	0.00119361	Positively correlated
PDZRN3	3p13	0.183389	9.81369e-05	0.00119944	Positively correlated
ZNF687	1q21.3	0.183221	9.96123e-05	0.00121564	Positively correlated
PLPPR1	9q31.1	0.182902	0.000102486	0.00124651	Positively correlated
EPB41L4A-AS1	5q22.1	0.182869	0.000102786	0.00124928	Positively correlated
CYP4A22	1p33	0.18281	0.000103325	0.00125443	Positively correlated
NEDD1	12q23.1	0.182781	0.000103597	0.00125697	Positively correlated
MIPOL1	14q13.3-q21.1	0.18274	0.000103971	0.00126074	Positively correlated
PRIM1	12q13.3	0.182711	0.000104237	0.00126321	Positively correlated
KLHL23	2q31.1	0.182704	0.000104303	0.00126324	Positively correlated
RIOK3	18q11.2	0.182675	0.000104576	0.00126502	Positively correlated
ACOT4	14q24.3	0.182549	0.000105747	0.00127549	Positively correlated
SLCO2A1	3q22.1-q22.2	0.18252	0.000106022	0.00127787	Positively correlated
CLDN2	Xq22.3	0.182492	0.000106283	0.00128025	Positively correlated
RAB38	11q14.2	0.182396	0.000107194	0.00128967	Positively correlated
FGF7P6	9q13	0.182354	0.000107595	0.00129295	Positively correlated
LMBRD1	6q13	0.18227	0.000108396	0.00130179	Positively correlated
IRAK1BP1	6q14.1	0.182182	0.00010925	0.00131126	Positively correlated
ARHGAP24	4q21.23-q21.3	0.182162	0.000109442	0.00131278	Positively correlated
CCDC85A	2p16.1	0.182152	0.000109534	0.0013131	Positively correlated
ZC3H12C	11q22.3	0.182064	0.000110398	0.00132187	Positively correlated
CDH13	16q23.3	0.182019	0.000110839	0.00132609	Positively correlated
WLS	1p31.3	0.182014	0.000110882	0.00132609	Positively correlated
IVNS1ABP	1q25.3	0.181949	0.000111519	0.00133053	Positively correlated
CYP2J2	1p32.1	0.181887	0.000112133	0.00133546	Positively correlated
SSTR1	14q13	0.181791	0.000113092	0.00134357	Positively correlated
SPART	13q13.3	0.181788	0.00011312	0.00134357	Positively correlated
FGGY	1p32.1	0.181788	0.000113127	0.00134357	Positively correlated
PHKA2	Xp22.13	0.181785	0.000113149	0.00134357	Positively correlated
GALNT12	9q22.33	0.181767	0.000113338	0.00134427	Positively correlated
ASPG	14q32.33	0.181766	0.000113342	0.00134427	Positively correlated
NPositively correlated133	1q42.13	0.181756	0.000113443	0.00134437	Positively correlated
CBX7	22q13.1	0.181741	0.000113595	0.00134488	Positively correlated
TTC28	22q12.1	0.181713	0.000113875	0.0013474	Positively correlated
ACSS3	12q21.31	0.181694	0.000114063	0.00134883	Positively correlated
UBE2D3	4q24	0.181614	0.000114874	0.00135686	Positively correlated
SLC35F1	6q22.2-q22.31	0.181614	0.000114878	0.00135686	Positively correlated
NLRP11	19q13.43	0.181587	0.000115154	0.00135932	Positively correlated
CHRM3	1q43	0.181447	0.00011658	0.00137292	Positively correlated
SLC2A9	4p16.1	0.181422	0.000116837	0.00137433	Positively correlated
DCTN6	8p12	0.181415	0.000116907	0.00137434	Positively correlated
TOX4	14q11.2	0.181373	0.000117344	0.00137839	Positively correlated
TADA1	1q24.1	0.181344	0.000117648	0.0013791	Positively correlated
IYD	6q25.1	0.181333	0.000117757	0.0013791	Positively correlated
GGNBP2	17q12	0.18133	0.00011779	0.0013791	Positively correlated
FBXL3	13q22.3	0.181312	0.000117976	0.00138043	Positively correlated
POU3F3	2q12.1	0.181243	0.000118698	0.00138645	Positively correlated
TERF1	8q21.11	0.18122	0.000118936	0.00138841	Positively correlated
TAF7	5q31.3	0.181134	0.000119849	0.00139583	Positively correlated
NBR1	17q21.31	0.181055	0.000120678	0.00140323	Positively correlated
APBB1	11p15.4	0.180736	0.000124111	0.00143814	Positively correlated
DRC3	17p11.2	0.180735	0.000124129	0.00143814	Positively correlated
NLE1	17q12	0.180696	0.00012455	0.00144133	Positively correlated
ABCB7	Xq13.3	0.180629	0.000125289	0.0014474	Positively correlated
MAPK8	10q11.22	0.180621	0.000125377	0.00144758	Positively correlated
ZNF185	Xq28	0.180591	0.000125711	0.00145011	Positively correlated
PER3	1p36.23	0.180588	0.00012574	0.00145011	Positively correlated
FZD1	7q21.13	0.180545	0.000126218	0.00145477	Positively correlated
UBR3	2q31.1	0.180511	0.00012659	0.00145655	Positively correlated
HHAT	1q32.2	0.180451	0.000127264	0.00146346	Positively correlated
ANKRD40	17q21.33	0.180333	0.000128584	0.00147526	Positively correlated
BTNL9	5q35.3	0.180317	0.000128763	0.00147647	Positively correlated
FAM47E	4q21.1	0.180305	0.0001289	0.00147719	Positively correlated
DDX18	2q14.1	0.180195	0.000130153	0.00148984	Positively correlated
NLRP6	11p15.5	0.180156	0.000130601	0.00149327	Positively correlated
YIPF5	5q31.3	0.180083	0.000131438	0.00150112	Positively correlated
VSTM4	10q11.23	0.179977	0.000132664	0.00151339	Positively correlated
STBD1	4q21.1	0.179954	0.000132927	0.00151554	Positively correlated
MAP3K21	1q42.2	0.179872	0.000133886	0.001523	Positively correlated
CYP7B1	8q12.3	0.179865	0.000133974	0.00152313	Positively correlated
ANKRD36BP1	1q24.2	0.179853	0.00013411	0.00152382	Positively correlated
KDSR	18q21.33	0.179746	0.000135371	0.00153273	Positively correlated
ITGA6	2q31.1	0.179688	0.000136061	0.00153814	Positively correlated
KBTBD6	13q14.11	0.179649	0.000136524	0.00154162	Positively correlated
BBOF1	14q24.3	0.179502	0.000138281	0.00155708	Positively correlated
GMNC	3q28	0.17946	0.000138793	0.00156108	Positively correlated
OTUD7B	1q21.2	0.179407	0.000139438	0.00156747	Positively correlated
CPT2	1p32.3	0.17934	0.000140258	0.00157315	Positively correlated
TCP1	6q25.3	0.179309	0.000140633	0.00157557	Positively correlated
C17ORF107	17p13.2	0.179243	0.000141449	0.00158297	Positively correlated
PEX1	7q21.2	0.179194	0.000142058	0.00158874	Positively correlated
SHROOM4	Xp11.22	0.179188	0.000142123	0.00158874	Positively correlated
ZXDA	Xp11.21	0.179069	0.000143605	0.00160262	Positively correlated
NCOA7	6q22.31-q22.32	0.179052	0.00014382	0.00160358	Positively correlated
GJA1	6q22.31	0.17897	0.000144857	0.00161226	Positively correlated
SHLD2P1	10q11.22	0.178965	0.000144913	0.00161226	Positively correlated
BICRAL	6p21.1	0.178962	0.000144953	0.00161226	Positively correlated
PELO	5q11.2	0.178782	0.000147246	0.00163505	Positively correlated
ELP2	18q12.2	0.178764	0.00014748	0.00163674	Positively correlated
LRRC40	1p31.1	0.178561	0.000150102	0.00165849	Positively correlated
GIMAP6	7q36.1	0.17855	0.000150248	0.00165891	Positively correlated
ESR1	6q25.1-q25.2	0.178397	0.000152251	0.00167484	Positively correlated
GUCY1A1	4q32.1	0.178336	0.000153057	0.00168186	Positively correlated
GSTA4	6p12.2	0.178308	0.000153431	0.00168505	Positively correlated
PRPF38A	1p32.3	0.178293	0.000153628	0.00168546	Positively correlated
COPS4	4q21.22	0.178293	0.000153637	0.00168546	Positively correlated
FAM110C	2p25.3	0.178221	0.000154594	0.00169411	Positively correlated
G3BP1	5q33.1	0.178206	0.000154794	0.00169537	Positively correlated
SLC12A1	15q21.1	0.178144	0.000155637	0.00170297	Positively correlated
CDC42BPA	1q42.13	0.178142	0.000155658	0.00170297	Positively correlated
COLCA1	11q23.1	0.177864	0.000159458	0.00174042	Positively correlated
CHMP3	2p11.2	0.177816	0.00016012	0.00174516	Positively correlated
RCAN2	6p12.3	0.177809	0.000160208	0.00174516	Positively correlated
ACSM2B	16p12.3	0.177568	0.000163584	0.00177707	Positively correlated
MARCHF8	10q11.21-q11.22	0.177554	0.000163789	0.00177737	Positively correlated
PRMT5	14q11.2	0.177524	0.000164205	0.00178092	Positively correlated
CRK	17p13.3	0.177514	0.000164347	0.001781	Positively correlated
MAST4	5q12.3	0.177511	0.00016439	0.001781	Positively correlated
CEBPZ	2p22.2	0.177437	0.000165445	0.00178953	Positively correlated
STC2	5q35.2	0.177196	0.000168927	0.00182031	Positively correlated
SENP8	15q23	0.177147	0.000169645	0.00182668	Positively correlated
NUMB	14q24.3	0.177135	0.000169819	0.00182697	Positively correlated
LINC02685	11p11.2	0.177104	0.000170272	0.00182987	Positively correlated
SPON1	11p15.2	0.177077	0.000170662	0.00183242	Positively correlated
COPS2	15q21.1	0.177064	0.000170862	0.00183327	Positively correlated
CDADC1	13q14.2	0.177	0.000171799	0.00183887	Positively correlated
KCNE3	11q13.4	0.176997	0.000171843	0.00183887	Positively correlated
LRRC37BP1	17q11.2	0.176858	0.000173925	0.00185816	Positively correlated
CCNI	4q21.1	0.176699	0.00017632	0.00187974	Positively correlated
PKLR	1q22	0.176652	0.00017703	0.00188631	Positively correlated
HSD11B2	16q22.1	0.176621	0.000177506	0.00188938	Positively correlated
NHEJ1	2q35	0.176602	0.000177791	0.00189131	Positively correlated
ALPL	1p36.12	0.176573	0.000178234	0.00189411	Positively correlated
COL18A1-AS1	21q22.3	0.176507	0.000179247	0.00190386	Positively correlated
METTL9	16p12.2	0.176445	0.000180209	0.00191205	Positively correlated
TTC26	7q34	0.176415	0.000180675	0.00191496	Positively correlated
CDKN1B	12p13.1	0.176299	0.000182475	0.00193085	Positively correlated
PLEKHA1	10q26.13	0.176167	0.000184552	0.00194987	Positively correlated
LINGO4	1q21.3	0.176091	0.000185762	0.00195852	Positively correlated
CUBN	10p13	0.176055	0.00018634	0.00196358	Positively correlated
SLC16A14	2q36.3	0.175911	0.000188662	0.00198283	Positively correlated
MIA2	14q13.2	0.175805	0.000190369	0.00199601	Positively correlated
TMEM47	Xp21.1	0.175741	0.000191424	0.00200345	Positively correlated
DNAI4	1p31.3	0.175638	0.000193119	0.00201593	Positively correlated
AUH	9q22.31	0.175624	0.000193349	0.00201622	Positively correlated
RAB3GAP2	1q41	0.175556	0.000194477	0.00202586	Positively correlated
FGFR3	4p16.3	0.175478	0.000195767	0.00203388	Positively correlated
SRP54	14q13.2	0.175469	0.000195932	0.00203388	Positively correlated
DTNBP1	6p22.3	0.175467	0.000195956	0.00203388	Positively correlated
EML1	14q32.2	0.175428	0.000196616	0.00203862	Positively correlated
DIP2C	10p15.3	0.175401	0.000197059	0.00204109	Positively correlated
ORC4	2q23.1	0.17536	0.00019775	0.00204719	Positively correlated
TMEM59	1p32.3	0.175277	0.00019916	0.00206073	Positively correlated
INHBA-AS1	7p14.1	0.175267	0.000199341	0.00206153	Positively correlated
CEP104	1p36.32	0.175253	0.000199575	0.00206183	Positively correlated
HSDL2	9q32	0.175245	0.000199711	0.00206217	Positively correlated
PGAP3	17q12	0.175194	0.000200583	0.0020701	Positively correlated
RNF186	1p36.13	0.175145	0.000201421	0.00207661	Positively correlated
MRPL45	17q12	0.175086	0.000202433	0.00208277	Positively correlated
ANKS4B	16p12.2	0.175023	0.00020353	0.0020919	Positively correlated
TM7SF3	12p11.23	0.17492	0.00020532	0.00210597	Positively correlated
FAM9C	Xp22.2	0.174894	0.000205775	0.00210865	Positively correlated
CLEC18A	16q22.1	0.174724	0.000208769	0.00213465	Positively correlated
NRP1	10p11.22	0.174719	0.000208862	0.00213465	Positively correlated
SPRTN	1q42.2	0.174574	0.000211453	0.00215235	Positively correlated
HDX	Xq21.1	0.174567	0.000211588	0.00215263	Positively correlated
DYNC2LI1	2p21	0.174425	0.000214148	0.00217646	Positively correlated
ZDHHC21	9p22.3	0.17438	0.000214981	0.00218383	Positively correlated
FPGT	1p31.1	0.174298	0.000216481	0.00219794	Positively correlated
ACE2	Xp22.2	0.174116	0.000219838	0.00222414	Positively correlated
SRP68	17q25.1	0.174025	0.000221549	0.00223806	Positively correlated
METTL14	4q26	0.173958	0.000222819	0.00224749	Positively correlated
RNF43	17q22	0.17393	0.000223337	0.00225084	Positively correlated
MORN1	1p36.32	0.173924	0.000223457	0.00225084	Positively correlated
EIF1AX	Xp22.12	0.173865	0.000224573	0.00225609	Positively correlated
RADX	Xq22.3	0.173812	0.000225588	0.00226256	Positively correlated
PTH1R	3p21.31	0.173809	0.000225648	0.00226256	Positively correlated
TMEM97	17q11.2	0.173784	0.00022612	0.00226256	Positively correlated
PLPP1	5q11.2	0.173617	0.000229328	0.0022878	Positively correlated
DAO	12q24.11	0.173595	0.000229754	0.00229091	Positively correlated
HOXD8	2q31.1	0.173512	0.000231375	0.00230408	Positively correlated
THNSL2	2p11.2	0.173499	0.000231643	0.00230515	Positively correlated
DCTN4	5q33.1	0.173413	0.000233332	0.00231506	Positively correlated
PRRC1	5q23.2	0.173381	0.00023395	0.00232004	Positively correlated
P4HA1	10q22.1	0.173368	0.000234215	0.00232152	Positively correlated
CREG1	1q24.2	0.173273	0.000236102	0.00233791	Positively correlated
RAB11FIP2	10q26.11	0.173238	0.000236809	0.00234376	Positively correlated
PCDHGA2	5q31.3	0.173225	0.000237069	0.00234517	Positively correlated
VPS26C	21q22.13	0.173191	0.000237747	0.00235071	Positively correlated
ZC2HC1A	8q21.13	0.173156	0.000238437	0.00235295	Positively correlated
PTPN13	4q21.3	0.17301	0.000241404	0.00237866	Positively correlated
TMEM135	11q14.2	0.172781	0.000246096	0.00242013	Positively correlated
TRPS1	8q23.3	0.172718	0.000247404	0.0024318	Positively correlated
TUBB4A	19p13.3	0.172694	0.000247922	0.0024333	Positively correlated
KCNK5	6p21.2	0.172615	0.000249561	0.00244819	Positively correlated
CRADD	12q22	0.172538	0.000251196	0.00245941	Positively correlated
CREBL2	12p13.1	0.172471	0.000252601	0.00246955	Positively correlated
GSPT2	Xp11.22	0.172457	0.00025291	0.00247016	Positively correlated
HOXC10	12q13.13	0.172358	0.000255015	0.00248587	Positively correlated
MGARP	4q31.1	0.172311	0.000256019	0.00249444	Positively correlated
RASIP1	19q13.33	0.172281	0.000256676	0.00249932	Positively correlated
MFAP3L	4q33	0.172211	0.000258177	0.0025118	Positively correlated
TTC30B	2q31.2	0.171896	0.000265088	0.00256904	Positively correlated
PIK3C2B	1q32.1	0.17184	0.000266335	0.00257864	Positively correlated
HAUS4	14q11.2	0.171825	0.000266682	0.00258076	Positively correlated
PRRG4	11p13	0.171803	0.000267161	0.00258343	Positively correlated
RBBP4	1p35.1	0.171677	0.000269993	0.00260525	Positively correlated
SDHD	11q23.1	0.171625	0.000271169	0.00261283	Positively correlated
OSBPL8	12q21.2	0.171522	0.00027353	0.00262799	Positively correlated
AKR1C1	10p15.1	0.171513	0.000273728	0.00262863	Positively correlated
SLC17A1	6p22.2	0.171483	0.000274427	0.00263408	Positively correlated
SMAD9	13q13.3	0.171473	0.00027465	0.00263495	Positively correlated
SEMA3D	7q21.11	0.171255	0.0002797	0.00267827	Positively correlated
BTBD16	10q26.13	0.171189	0.000281236	0.00269041	Positively correlated
ZNF615	19q13.41	0.171181	0.000281424	0.00269092	Positively correlated
CCDC115	2q21.1	0.171155	0.000282041	0.00269166	Positively correlated
GPR85	7q31.1	0.171149	0.000282173	0.00269166	Positively correlated
MTARC1	1q41	0.171105	0.000283227	0.00270043	Positively correlated
GNAI1	7q21.11	0.171073	0.000283986	0.00270638	Positively correlated
UBE2E3	2q31.3	0.171015	0.000285347	0.00271806	Positively correlated
IFT122	3q21.3-q22.1	0.171008	0.000285512	0.00271833	Positively correlated
LINC00671	17q21.31	0.170993	0.000285879	0.00271986	Positively correlated
PTP4A1	6q12	0.17099	0.000285944	0.00271986	Positively correlated
CCDC89	11q14.1	0.170958	0.000286704	0.0027245	Positively correlated
NFIA	1p31.3	0.170874	0.000288726	0.00274112	Positively correlated
NECTIN3	3q13.13	0.170844	0.000289455	0.00274543	Positively correlated
STAM2	2q23.3	0.170834	0.000289683	0.0027455	Positively correlated
CREB3L4	1q21.3	0.170823	0.000289949	0.0027455	Positively correlated
KIZ	20p11.23	0.170821	0.00029001	0.0027455	Positively correlated
JAG1	20p12.2	0.170669	0.000293703	0.00277162	Positively correlated
NET1	10p15.1	0.170648	0.000294204	0.00277472	Positively correlated
VPS4B	18q21.33	0.170471	0.000298568	0.00281058	Positively correlated
MTMR11	1q21.2	0.170443	0.000299279	0.00281523	Positively correlated
LINC00593	15q23	0.170414	0.000300005	0.00281749	Positively correlated
CHMP5	9p13.3	0.170369	0.00030112	0.00282266	Positively correlated
FAM107A	3p14.3-p14.2	0.170349	0.000301624	0.00282475	Positively correlated
ENTPD5	14q24.3	0.170338	0.000301904	0.00282605	Positively correlated
AASDHPPT	11q22.3	0.170319	0.000302376	0.00282782	Positively correlated
RSL1D1	16p13.13	0.170298	0.000302906	0.00283146	Positively correlated
SLC5A2	16p11.2	0.170282	0.000303298	0.0028338	Positively correlated
NEDD4	15q21.3	0.170265	0.000303738	0.00283659	Positively correlated
ZNF354C	5q35.3	0.170206	0.000305227	0.00284386	Positively correlated
RDH12	14q24.1	0.170176	0.000305996	0.00284837	Positively correlated
LIPE	19q13.2	0.170156	0.000306485	0.00285028	Positively correlated
MRPS9	2q12.1	0.170095	0.000308048	0.00286216	Positively correlated
REN	1q32.1	0.170083	0.000308367	0.00286269	Positively correlated
BRPF3	6p21.31	0.170041	0.000309434	0.00286605	Positively correlated
DLEU1	13q14.2-q14.3	0.169988	0.000310805	0.00287444	Positively correlated
PIK3CB	3q22.3	0.169977	0.000311087	0.00287572	Positively correlated
ADAMTS5	21q21.3	0.169954	0.000311668	0.00287977	Positively correlated
GMPR2	14q12	0.169792	0.000315875	0.0029113	Positively correlated
TIMP3	22q12.3	0.169755	0.000316842	0.00291413	Positively correlated
CCDC198	14q22.3	0.169703	0.000318235	0.0029219	Positively correlated
GPHN	14q23.3	0.169701	0.00031827	0.0029219	Positively correlated
AJUBA	14q11.2	0.169627	0.000320229	0.00293854	Positively correlated
ASNSD1	2q32.2	0.169621	0.000320394	0.0029387	Positively correlated
DNAJB4	1p31.1	0.169562	0.000321968	0.00295099	Positively correlated
KIF26A	14q32.33	0.169559	0.000322049	0.00295099	Positively correlated
OSBPL1A	18q11.2	0.169332	0.000328142	0.00299742	Positively correlated
GLP1R	6p21.2	0.169325	0.000328322	0.0029977	Positively correlated
AMOTL2	3q22.2	0.169221	0.000331165	0.00301267	Positively correlated
SLC2A13	12q12	0.169137	0.000333473	0.00302954	Positively correlated
ACAT1	11q22.3	0.169096	0.000334603	0.00303567	Positively correlated
HNRNPA1L2	13q14.3	0.169071	0.000335296	0.00304059	Positively correlated
AFF3	2q11.2	0.169054	0.000335748	0.0030433	Positively correlated
EXOC3L1	16q22.1	0.169029	0.000336458	0.00304836	Positively correlated
CRYL1	13q12.11	0.168967	0.000338163	0.00305827	Positively correlated
SLC25A48	5q31.1	0.168946	0.00033877	0.003061	Positively correlated
KATNA1	6q25.1	0.168892	0.000340264	0.00307034	Positively correlated
SLC22A13	3p22.2	0.168853	0.000341373	0.00307897	Positively correlated
ATOH8	2p11.2	0.168789	0.000343173	0.00309242	Positively correlated
PGAP4	9q31.1	0.168773	0.000343621	0.00309506	Positively correlated
STON1	2p16.3	0.168765	0.000343835	0.0030956	Positively correlated
C9ORF43	9q32	0.168664	0.000346722	0.00311459	Positively correlated
MYEF2	15q21.1	0.168637	0.000347492	0.00311871	Positively correlated
AUTS2	7q11.22	0.168603	0.000348478	0.00312498	Positively correlated
SENP2	3q27.2	0.168565	0.000349569	0.00313174	Positively correlated
C1ORF210	1p34.2	0.168555	0.000349844	0.0031328	Positively correlated
GLYATL2	11q12.1	0.168549	0.000350011	0.0031329	Positively correlated
PCDH12	5q31.3	0.168464	0.000352481	0.00314863	Positively correlated
PTPRK	6q22.33	0.168461	0.000352555	0.00314863	Positively correlated
SAMD5	6q24.3	0.168428	0.000353513	0.00315578	Positively correlated
LSM14A	19q13.11	0.168354	0.000355665	0.00316978	Positively correlated
ARMCX1	Xq22.1	0.167971	0.000367044	0.00325193	Positively correlated
CDH2	18q12.1	0.167717	0.000374741	0.0033128	Positively correlated
CAPN14	2p23.1	0.167645	0.000376975	0.00333108	Positively correlated
MEF2C	5q14.3	0.167604	0.000378238	0.0033393	Positively correlated
CLMN	14q32.13	0.167554	0.000379773	0.00334548	Positively correlated
CRB1	1q31.3	0.167545	0.00038005	0.00334644	Positively correlated
DOCK8-AS1	9p24.3	0.167472	0.000382332	0.0033621	Positively correlated
SHPRH	6q24.3	0.167423	0.000383867	0.00337247	Positively correlated
PECAM1	17q23.3	0.167303	0.000387667	0.00339857	Positively correlated
ANGPTL3	1p31.3	0.167278	0.000388448	0.00340244	Positively correlated
AK4	1p31.3	0.167271	0.000388659	0.00340281	Positively correlated
CLCN4	Xp22.2	0.167224	0.000390154	0.0034144	Positively correlated
SLC44A1	9q31.1-q31.2	0.167192	0.000391183	0.00342191	Positively correlated
UBE4B	1p36.22	0.167141	0.000392802	0.00343313	Positively correlated
HSD17B11	4q22.1	0.167141	0.000392808	0.00343313	Positively correlated
KCNJ15	21q22.13-q22.2	0.167135	0.000393014	0.00343343	Positively correlated
GLUD2	Xq24	0.167121	0.000393472	0.00343556	Positively correlated
GALNT15	3p25.1	0.167117	0.0003936	0.00343556	Positively correlated
ARHGAP5	14q12	0.167072	0.000395045	0.00344667	Positively correlated
THAP5	7q31.1	0.167054	0.000395614	0.00345013	Positively correlated
ZNF836	19q13.33	0.16704	0.000396053	0.00345111	Positively correlated
ACSM5	16p12.3	0.166976	0.000398138	0.0034631	Positively correlated
GALC	14q31.3	0.166961	0.000398635	0.00346498	Positively correlated
LRRC49	15q23	0.166959	0.000398701	0.00346498	Positively correlated
ZNF396	18q12.2	0.166834	0.000402763	0.00349119	Positively correlated
GPX3	5q33.1	0.166802	0.000403823	0.00349735	Positively correlated
LINC00271	6q23.3	0.166774	0.000404763	0.00350246	Positively correlated
COPA	1q23.2	0.166734	0.000406064	0.0035107	Positively correlated
SORCS1	10q25.1	0.166728	0.000406266	0.00351092	Positively correlated
DDX3X	Xp11.4	0.166686	0.000407662	0.00352146	Positively correlated
RFLNB	17p13.3	0.166681	0.000407837	0.00352146	Positively correlated
TUBD1	17q23.1	0.166634	0.000409393	0.00353033	Positively correlated
PPP1R13B	14q32.33	0.166587	0.000410971	0.00354089	Positively correlated
CASP12	11q22.3	0.166569	0.000411555	0.0035444	Positively correlated
BCL9	1q21.2	0.166555	0.000412024	0.00354691	Positively correlated
EMID1	22q12.2	0.166542	0.000412448	0.00354904	Positively correlated
ARHGEF15	17p13.1	0.166518	0.000413272	0.0035539	Positively correlated
ASS1	9q34.11	0.166515	0.000413368	0.0035539	Positively correlated
SGPP1	14q23.2	0.166424	0.000416434	0.00357566	Positively correlated
RNASEL	1q25.3	0.166389	0.000417626	0.00358436	Positively correlated
SHLD2P3	10q11.22	0.166367	0.000418361	0.00358606	Positively correlated
HSD17B8	6p21.32	0.166324	0.00041984	0.00359719	Positively correlated
ZNF124	1q44	0.166302	0.000420574	0.00360194	Positively correlated
SECISBP2	9q22.2	0.166294	0.00042087	0.00360293	Positively correlated
CCDC121	2p23.3	0.166277	0.000421441	0.00360474	Positively correlated
SLFN13	17q12	0.166258	0.000422085	0.00360871	Positively correlated
SRSF8	11q21	0.16625	0.00042237	0.00360961	Positively correlated
LGSN	6q12	0.166111	0.000427162	0.00364434	Positively correlated
FAM149A	4q35.1	0.166059	0.000428959	0.00365345	Positively correlated
TMEM88	17p13.1	0.166016	0.00043047	0.0036632	Positively correlated
GALNT14	2p23.1	0.166007	0.000430782	0.0036643	Positively correlated
HSD3B2	1p12	0.165992	0.0004313	0.00366457	Positively correlated
LMO2	11p13	0.165986	0.000431508	0.00366457	Positively correlated
P2RY14	3q25.1	0.165983	0.000431612	0.00366457	Positively correlated
WWP1	8q21.3	0.165981	0.000431688	0.00366457	Positively correlated
NKIRAS1	3p24.2	0.16598	0.000431728	0.00366457	Positively correlated
FRAS1	4q21.21	0.165964	0.000432282	0.00366772	Positively correlated
CCDC47	17q23.3	0.165935	0.000433288	0.00367281	Positively correlated
GRIK3	1p34.3	0.165932	0.000433391	0.00367281	Positively correlated
ATP11B	3q26.33	0.165921	0.000433799	0.00367281	Positively correlated
TMCC1	3q22.1	0.165897	0.000434642	0.00367684	Positively correlated
MCTP2	15q26.2	0.165884	0.000435085	0.00367903	Positively correlated
VPS13B	8q22.2	0.165841	0.000436607	0.00369034	Positively correlated
GLO1	6p21.2	0.165821	0.00043733	0.00369489	Positively correlated
CNTLN	9p22.2	0.165763	0.000439397	0.00370923	Positively correlated
AQP7	9p13.3	0.165751	0.000439818	0.00371122	Positively correlated
MAOB	Xp11.3	0.165733	0.000440433	0.00371485	Positively correlated
RNF103	2p11.2	0.165701	0.000441607	0.00372318	Positively correlated
C3ORF70	3q27.2	0.165658	0.00044313	0.00373445	Positively correlated
CCND1	11q13.3	0.165642	0.000443708	0.00373774	Positively correlated
CNST	1q44	0.16558	0.000445952	0.00375349	Positively correlated
TRIM15	6p22.1	0.165558	0.000446744	0.003757	Positively correlated
RBM43	2q23.3	0.165531	0.000447702	0.0037619	Positively correlated
ZNF770	15q14	0.1655	0.000448818	0.00376758	Positively correlated
MAIP1	2q33.1	0.165495	0.000449031	0.00376758	Positively correlated
TAF4B	18q11.2	0.165487	0.000449319	0.00376758	Positively correlated
P2RY8	Xp22.33 and Yp11.3	0.165366	0.000453737	0.00379986	Positively correlated
KIFAP3	1q24.2	0.165282	0.000456794	0.00382299	Positively correlated
CPEB4	5q35.2	0.165228	0.000458799	0.0038368	Positively correlated
RBM46	4q32.1	0.165225	0.000458915	0.0038368	Positively correlated
OTUD3	1p36.13	0.16512	0.000462819	0.00385978	Positively correlated
SAMD15	14q24.3	0.165058	0.000465131	0.00387583	Positively correlated
TTLL10	1p36.33	0.165	0.000467318	0.00389023	Positively correlated
ARL6	3q11.2	0.164979	0.000468113	0.00389258	Positively correlated
ZNF470	19q13.43	0.164868	0.000472314	0.00391938	Positively correlated
FAM81B	5q15	0.164852	0.000472929	0.00392124	Positively correlated
LINC00602	6q27	0.164751	0.000476778	0.00394988	Positively correlated
ITGA2	5q11.2	0.164651	0.000480661	0.00397712	Positively correlated
ZNF821	16q22.2	0.164598	0.000482688	0.00398894	Positively correlated
ABCD3	1p21.3	0.164527	0.000485479	0.00400705	Positively correlated
FAM86B2	8p23.1	0.164457	0.000488216	0.00402608	Positively correlated
NECAB1	8q21.3	0.164452	0.000488397	0.00402608	Positively correlated
AMD1	6q21	0.164291	0.000494776	0.0040687	Positively correlated
NAT8	2p13.1	0.16422	0.000497594	0.0040902	Positively correlated
C16ORF96	16p13.3	0.164213	0.000497854	0.00409064	Positively correlated
CYP2C8	10q23.33	0.164197	0.000498502	0.00409166	Positively correlated
LRRC47	1p36.32	0.164195	0.000498589	0.00409166	Positively correlated
ARHGAP42	11q22.1	0.164184	0.000499039	0.00409367	Positively correlated
YTHDC1	4q13.2	0.164173	0.000499453	0.0040954	Positively correlated
TNS1	2q35	0.164147	0.000500528	0.00409917	Positively correlated
TTC22	1p32.3	0.164123	0.000501493	0.00410491	Positively correlated
EBF3	10q26.3	0.164093	0.000502681	0.00411008	Positively correlated
ATP11C	Xq27.1	0.164031	0.000505207	0.004124	Positively correlated
LINC00689	7q36.3	0.16394	0.000508897	0.00414568	Positively correlated
HECW2	2q32.3	0.163829	0.000513434	0.00417246	Positively correlated
BTBD7	14q32.12	0.163767	0.000515982	0.00418467	Positively correlated
TMEM91	19q13.2	0.163745	0.000516896	0.00419039	Positively correlated
SEC16B	1q25.2	0.163722	0.000517849	0.00419642	Positively correlated
FRA10AC1	10q23.33	0.163647	0.000520995	0.00421559	Positively correlated
RMST	12q23.1	0.163645	0.000521056	0.00421559	Positively correlated
ACAP2	3q29	0.163584	0.000523615	0.00423458	Positively correlated
ADIRF	10q23.2	0.163558	0.000524683	0.00424151	Positively correlated
C14ORF180	14q32.33	0.163496	0.000527315	0.00425935	Positively correlated
CCDC103	17q21.31	0.163408	0.000531019	0.00428236	Positively correlated
ZBTB9	6p21.32	0.163383	0.000532079	0.00428918	Positively correlated
FXR1	3q26.33	0.163311	0.000535178	0.00430377	Positively correlated
PLRG1	4q31.3	0.163182	0.000540714	0.00433958	Positively correlated
DIPK2B	Xp11.3	0.163129	0.00054301	0.00435625	Positively correlated
TACR3	4q24	0.163036	0.000547013	0.0043831	Positively correlated
ACBD6	1q25.2-q25.3	0.162979	0.000549515	0.00439676	Positively correlated
BCL6B	17p13.1	0.162977	0.000549595	0.00439676	Positively correlated
TSN	2q14.3	0.162916	0.000552273	0.00441642	Positively correlated
CDKL1	14q21.3	0.162883	0.000553725	0.00442626	Positively correlated
IRAG2	12p12.1	0.162868	0.000554411	0.0044296	Positively correlated
HHLA2	3q13.13	0.162862	0.000554662	0.0044296	Positively correlated
YY1	14q32.2	0.162859	0.000554806	0.0044296	Positively correlated
MCMBP	10q26.11	0.162832	0.000556002	0.00443562	Positively correlated
TUBGCP3	13q34	0.162826	0.000556257	0.00443588	Positively correlated
KPNA5	6q22.1	0.162807	0.000557115	0.00444095	Positively correlated
ZBTB14	18p11.31	0.162783	0.000558174	0.00444763	Positively correlated
DHTKD1	10p14	0.162757	0.000559342	0.00445516	Positively correlated
ANK1	8p11.21	0.162732	0.00056046	0.0044623	Positively correlated
GRAMD1C	3q13.31	0.162714	0.000561251	0.00446505	Positively correlated
ADIPOR1	1q32.1	0.162685	0.000562537	0.0044735	Positively correlated
FAM204A	10q26.11	0.162633	0.000564881	0.00448858	Positively correlated
PRPSAP2	17p11.2	0.16262	0.000565462	0.00448963	Positively correlated
EIF4H	7q11.23	0.162554	0.000568436	0.00450822	Positively correlated
HRH2	5q35.2	0.162502	0.000570779	0.00452109	Positively correlated
EGR1	5q31.2	0.162431	0.000574022	0.00454498	Positively correlated
CNDP2	18q22.3	0.16234	0.000578194	0.00457621	Positively correlated
SMG8	17q22	0.162274	0.000581239	0.00459649	Positively correlated
RALGAPA1	14q13.2	0.162259	0.000581892	0.00459821	Positively correlated
MFSD4A	1q32.1	0.162188	0.0005852	0.00462252	Positively correlated
CARNMT1	9q21.13	0.162152	0.000586873	0.00463253	Positively correlated
CTAGE1	18q11.2	0.162151	0.000586929	0.00463253	Positively correlated
TRIM6	11p15.4	0.162023	0.000592926	0.00466332	Positively correlated
CD46	1q32.2	0.162012	0.000593428	0.00466471	Positively correlated
DMAC2L	14q21.3	0.162009	0.000593568	0.00466471	Positively correlated
CAMSAP1	9q34.3	0.161996	0.000594173	0.00466558	Positively correlated
CNN3	1p21.3	0.161992	0.000594377	0.00466558	Positively correlated
RGS9	17q24.1	0.161959	0.000595908	0.00467577	Positively correlated
DIP2C-AS1	10p15.3	0.161929	0.000597328	0.00468507	Positively correlated
LINC02447	4p16.1	0.161869	0.000600215	0.00470301	Positively correlated
CIRBP	19p13.3	0.161836	0.000601764	0.00471064	Positively correlated
HMGCLL1	6p12.1	0.161772	0.000604813	0.00472712	Positively correlated
LINC01600	6p25.2	0.161738	0.000606433	0.00473794	Positively correlated
ITGA8	10p13	0.161711	0.000607744	0.00474448	Positively correlated
LRRC55	11q12.1	0.161697	0.000608417	0.00474604	Positively correlated
DHRS4-AS1	14q11.2	0.161676	0.000609411	0.00475009	Positively correlated
SERBP1	1p31.3	0.161634	0.000611482	0.0047629	Positively correlated
PRORP	14q13.2	0.161603	0.000612939	0.00477016	Positively correlated
ROBO4	11q24.2	0.161534	0.000616328	0.00479281	Positively correlated
RIPOR3	20q13.13	0.161493	0.000618318	0.00480456	Positively correlated
DUBR	3q13.12	0.161445	0.000620643	0.00482075	Positively correlated
RFX2	19p13.3	0.161431	0.000621363	0.0048226	Positively correlated
TCEAL1	Xq22.2	0.161399	0.000622928	0.00483288	Positively correlated
TBL1X	Xp22.31-p22.2	0.161325	0.000626576	0.00485554	Positively correlated
DYSF	2p13.2	0.161293	0.00062816	0.00486405	Positively correlated
DIPK2A	3q24	0.161276	0.000629023	0.00486885	Positively correlated
METTL27	7q11.23	0.161158	0.000634905	0.0049068	Positively correlated
ERG	21q22.2	0.161138	0.000635888	0.0049125	Positively correlated
CELSR2	1p13.3	0.161089	0.000638335	0.00492741	Positively correlated
SPRING1	12q24.22	0.161085	0.000638556	0.00492741	Positively correlated
CPLANE2	1p36.13	0.160948	0.000645466	0.00497306	Positively correlated
ALB	4q13.3	0.160895	0.00064818	0.00498822	Positively correlated
FAAH	1p33	0.160849	0.000650533	0.00500057	Positively correlated
ABLIM3	5q32	0.160834	0.000651285	0.00500443	Positively correlated
ACTR6	12q23.1	0.160826	0.000651736	0.00500597	Positively correlated
MSH3	5q14.1	0.160817	0.00065216	0.00500731	Positively correlated
CCDC50	3q28	0.160795	0.000653307	0.00501265	Positively correlated
SALL1	16q12.1	0.160789	0.000653606	0.00501265	Positively correlated
ARHGEF16	1p36.32	0.16074	0.000656126	0.0050262	Positively correlated
NT5DC1	6q22.1	0.160727	0.000656822	0.005029	Positively correlated
TTC39B	9p22.3	0.160722	0.00065708	0.005029	Positively correlated
SP3	2q31.1	0.160688	0.000658855	0.0050394	Positively correlated
PHYH	10p13	0.160678	0.000659357	0.00504131	Positively correlated
PABIR1	9q21.11	0.160581	0.000664391	0.00507013	Positively correlated
NEMP2	2q32.2	0.160566	0.000665208	0.00507443	Positively correlated
SPOPL	2q22.1	0.160522	0.0006675	0.00508788	Positively correlated
FREM1	9p22.3	0.160517	0.000667733	0.00508788	Positively correlated
CCM2L	20q11.21	0.160393	0.000674269	0.00512793	Positively correlated
SGMS2	4q25	0.160383	0.00067481	0.00512815	Positively correlated
EEF1E1	6p24.3	0.160374	0.00067528	0.00512977	Positively correlated
KLHL9	9p21.3	0.16033	0.000677626	0.00514184	Positively correlated
ENPEP	4q25	0.16033	0.000677651	0.00514184	Positively correlated
HSD17B13	4q22.1	0.160325	0.000677896	0.00514184	Positively correlated
CEACAM1	19q13.2	0.160284	0.000680062	0.00515437	Positively correlated
BCAR3	1p22.1	0.160258	0.000681471	0.00516129	Positively correlated
RTP4	3q27.3	0.160243	0.000682264	0.00516325	Positively correlated
PRKAA1	5p13.1	0.160186	0.000685326	0.00518311	Positively correlated
LYPLAL1	1q41	0.160185	0.000685406	0.00518311	Positively correlated
TOMM70	3q12.2	0.160148	0.000687361	0.00519593	Positively correlated
YOD1	1q32.1	0.160098	0.000690086	0.00521063	Positively correlated
CRY2	11p11.2	0.159901	0.000700822	0.00528572	Positively correlated
NECAP1	12p13.31	0.159787	0.000707099	0.00532104	Positively correlated
GIMAP8	7q36.1	0.159714	0.000711174	0.00534712	Positively correlated
COX20	1q44	0.159698	0.000712056	0.0053503	Positively correlated
FBXO28	1q42.11	0.159637	0.000715454	0.00536979	Positively correlated
ACVR2A	2q22.3-q23.1	0.159503	0.000722955	0.00542	Positively correlated
CRYZL1	21q22.11	0.159466	0.000725055	0.00542965	Positively correlated
CDK20	9q22.1	0.159445	0.000726282	0.0054368	Positively correlated
DNAJB9	7q31.1	0.159399	0.00072888	0.00545149	Positively correlated
EDIL3	5q14.3	0.159385	0.000729696	0.00545421	Positively correlated
CPNE8	12q12	0.159363	0.000730926	0.00546045	Positively correlated
EIF3E	8q23.1	0.15936	0.000731077	0.00546045	Positively correlated
TNFRSF11B	8q24.12	0.159139	0.000743832	0.00554126	Positively correlated
USO1	4q21.1	0.1591	0.000746063	0.00555239	Positively correlated
TRAF6	11p12	0.159059	0.000748454	0.00556474	Positively correlated
SCARB1	12q24.31	0.159051	0.000748928	0.00556474	Positively correlated
KITLG	12q21.32	0.158977	0.000753286	0.00559089	Positively correlated
TMX1	14q22.1	0.158949	0.000754887	0.0056007	Positively correlated
MMUT	6p12.3	0.15893	0.000756056	0.00560315	Positively correlated
ZNF420	19q13.12	0.158914	0.000756973	0.0056058	Positively correlated
KLF6	10p15.2	0.158904	0.000757559	0.00560764	Positively correlated
SNX2	5q23.2	0.158868	0.000759668	0.00561745	Positively correlated
SLC36A4	11q21	0.158848	0.000760853	0.00562413	Positively correlated
SLC35A3	1p21.2	0.158835	0.000761658	0.00562801	Positively correlated
MYO3A	10p12.1	0.158823	0.000762331	0.0056309	Positively correlated
NPositively correlated54	4q21.1	0.158761	0.000766056	0.00565634	Positively correlated
CLEC18C	16q22.1	0.158698	0.000769785	0.00567759	Positively correlated
LINC00635	3q13.12	0.158674	0.000771264	0.00568431	Positively correlated
KLF2	19p13.11	0.158613	0.000774882	0.00570678	Positively correlated
TCEANC	Xp22.2	0.158594	0.000776056	0.00571332	Positively correlated
IFI44L	1p31.1	0.158582	0.000776791	0.00571663	Positively correlated
HINT3	6q22.32	0.158543	0.000779142	0.00572492	Positively correlated
FUT11	10q22.2	0.158466	0.000783789	0.00575334	Positively correlated
SNRK	3p22.1	0.158457	0.000784333	0.00575522	Positively correlated
KLHDC1	14q21.3	0.158428	0.000786127	0.00576627	Positively correlated
CDC40	6q21	0.158405	0.00078754	0.0057745	Positively correlated
HSP90AB2P	4p15.33	0.1584	0.000787825	0.0057745	Positively correlated
FAM171B	2q32.1	0.158329	0.000792172	0.00580211	Positively correlated
EPN2	17p11.2	0.158291	0.000794545	0.00581312	Positively correlated
HADH	4q25	0.158277	0.000795379	0.00581498	Positively correlated
DDX46	5q31.1	0.158261	0.000796402	0.00582033	Positively correlated
PLXNA2	1q32.2	0.158213	0.000799332	0.00583748	Positively correlated
EIF1	17q21.2	0.158194	0.000800523	0.00584405	Positively correlated
CACNA2D1	7q21.11	0.158162	0.00080252	0.00585649	Positively correlated
KIF12	9q32	0.158144	0.00080364	0.00586054	Positively correlated
AKT3	1q43-q44	0.158139	0.000803952	0.00586054	Positively correlated
MAML2	11q21	0.158127	0.000804728	0.00586406	Positively correlated
LRIG3	12q14.1	0.158109	0.000805842	0.00587005	Positively correlated
WDR47	1p13.3	0.158103	0.000806222	0.00587068	Positively correlated
ANKMY2	7p21.1	0.158086	0.000807246	0.005876	Positively correlated
NDRG1	8q24.22	0.158062	0.000808762	0.00588276	Positively correlated
C11ORF58	11p15.2	0.158006	0.000812299	0.00590206	Positively correlated
GLB1L2	11q25	0.157984	0.000813641	0.00590966	Positively correlated
SET	9q34.11	0.15791	0.000818341	0.00593734	Positively correlated
POLK	5q13.3	0.157829	0.000823493	0.00596824	Positively correlated
CDC14C	7p12.3	0.15779	0.000825967	0.00598184	Positively correlated
ABCB10	1q42.13	0.157755	0.00082819	0.00599361	Positively correlated
IDI1	10p15.3	0.157726	0.000830064	0.0059985	Positively correlated
ESAM	11q24.2	0.157706	0.000831336	0.00600553	Positively correlated
NKAPD1	11q23.1	0.157662	0.000834175	0.00601953	Positively correlated
MMGT1	Xq26.3	0.157635	0.000835922	0.00602964	Positively correlated
RBP7	1p36.22	0.157615	0.000837194	0.00603479	Positively correlated
PDE2A	11q13.4	0.157588	0.000838972	0.00604326	Positively correlated
CCNB1IP1	14q11.2	0.157548	0.000841554	0.0060557	Positively correlated
USP27X-DT	Xp11.23	0.157471	0.00084662	0.0060874	Positively correlated
SFR1	10q25.1	0.157456	0.000847598	0.00609224	Positively correlated
ABLIM1	10q25.3	0.157422	0.000849796	0.00610465	Positively correlated
FZD4	11q14.2	0.15742	0.000849933	0.00610465	Positively correlated
USP1	1p31.3	0.157351	0.000854497	0.00613083	Positively correlated
ARNT	1q21.3	0.157344	0.000854957	0.00613193	Positively correlated
SEMA4D	9q22.2	0.157329	0.000855921	0.00613665	Positively correlated
VAMP2	17p13.1	0.15731	0.000857172	0.00614123	Positively correlated
MGAM2	7q34	0.157221	0.000863097	0.00617484	Positively correlated
CFAP91	3q13.33	0.157203	0.000864247	0.00617777	Positively correlated
DPF3	14q24.2	0.157201	0.000864432	0.00617777	Positively correlated
CEP20	16p13.11	0.157056	0.000874127	0.00623372	Positively correlated
UGT2B7	4q13.2	0.157021	0.000876457	0.00624589	Positively correlated
ZBTB42	14q32.33	0.157006	0.000877489	0.00624694	Positively correlated
VPS26A	10q22.1	0.157005	0.00087754	0.00624694	Positively correlated
TANGO6	16q22.1	0.156976	0.000879521	0.00625659	Positively correlated
SLC26A2	5q32	0.156965	0.000880272	0.00625971	Positively correlated
IMPACT	18q11.2	0.156903	0.000884475	0.00628126	Positively correlated
FBXL13	7q22.1	0.156896	0.000884953	0.00628126	Positively correlated
ANO3	11p14.2	0.156888	0.000885497	0.00628126	Positively correlated
CREBRF	5q35.1	0.156875	0.000886411	0.00628541	Positively correlated
NEK7	1q31.3	0.156841	0.000888739	0.00629756	Positively correlated
ANKS6	9q22.33	0.156685	0.000899407	0.00635742	Positively correlated
CDK19	6q21	0.156665	0.00090079	0.00636495	Positively correlated
SFT2D2	1q24.2	0.156544	0.000909235	0.00641387	Positively correlated
TPSD1	16p13.3	0.156543	0.000909315	0.00641387	Positively correlated
STOML3	13q13.2	0.156512	0.000911485	0.00642519	Positively correlated
EID1	15q21.1	0.156511	0.000911562	0.00642519	Positively correlated
CASKIN2	17q25.1	0.156422	0.000917773	0.00645988	Positively correlated
TMED7	5q22.3	0.156394	0.000919733	0.00646913	Positively correlated
EGLN3	14q13.1	0.156382	0.000920621	0.00647083	Positively correlated
SUGT1P1	9p13.3	0.156255	0.000929641	0.00652736	Positively correlated
ETS1	11q24.3	0.156203	0.000933327	0.00654865	Positively correlated
KLHL15	Xp22.11	0.156102	0.000940591	0.00658423	Positively correlated
HSPA12A	10q25.3	0.156089	0.000941556	0.00658793	Positively correlated
RSPH1	21q22.3	0.156065	0.000943265	0.00659521	Positively correlated
IFIT2	10q23.31	0.156051	0.000944242	0.00659521	Positively correlated
GEMIN4	17p13.3	0.156022	0.000946342	0.00660537	Positively correlated
FAT4	4q28.1	0.156022	0.000946357	0.00660537	Positively correlated
TCF4	18q21.2	0.155934	0.000952782	0.00663895	Positively correlated
SH3BP5	3p25.1	0.155891	0.000955868	0.00665322	Positively correlated
HPCAL1	2p25.1	0.155873	0.000957224	0.00665803	Positively correlated
GINM1	6q25.1	0.155833	0.00096016	0.00667613	Positively correlated
DIAPH1	5q31.3	0.155814	0.000961542	0.00668342	Positively correlated
TRIM4	7q22.1	0.155804	0.000962253	0.00668549	Positively correlated
IGF1R	15q26.3	0.155775	0.000964435	0.00669506	Positively correlated
THTPA	14q11.2	0.155702	0.000969785	0.00672205	Positively correlated
ANKHD1	5q31.3	0.155635	0.000974758	0.00675419	Positively correlated
SHMT2	12q13.3	0.15561	0.000976628	0.00676481	Positively correlated
NFU1	2p13.3	0.155533	0.000982436	0.00680268	Positively correlated
SYNJ1	21q22.11	0.155519	0.000983476	0.00680518	Positively correlated
ARHGAP26	5q31.3	0.155477	0.000986649	0.00681537	Positively correlated
KANK3	19p13.2	0.155386	0.0009935	0.00686032	Positively correlated
MED12L	3q25.1	0.155278	0.00100168	0.00690015	Positively correlated
TTC21B	2q24.3	0.155259	0.00100319	0.00690106	Positively correlated
SLC41A1	1q32.1	0.155224	0.00100584	0.00691689	Positively correlated
HSD17B2	16q23.3	0.155119	0.00101393	0.00696774	Positively correlated
MLNR	13q14.2	0.154985	0.00102431	0.00702703	Positively correlated
CDKAL1	6p22.3	0.15492	0.00102939	0.00705179	Positively correlated
SPATA24	5q31.2	0.154882	0.00103238	0.00706787	Positively correlated
FAM120AOS	9q22.31	0.154857	0.00103433	0.00707881	Positively correlated
IDNK	9q21.32	0.154822	0.0010371	0.00709295	Positively correlated
NR3C1	5q31.3	0.154789	0.00103971	0.00710592	Positively correlated
RNF5P1	8p11.22	0.154645	0.0010511	0.00717011	Positively correlated
FCN3	1p36.11	0.154631	0.00105227	0.00717463	Positively correlated
B3GNT2	2p15	0.154573	0.00105692	0.00720386	Positively correlated
RCHY1	4q21.1	0.154488	0.00106373	0.0072453	Positively correlated
UGT2A1	4q13.3	0.154484	0.0010641	0.0072453	Positively correlated
ZNF792	19q13.11	0.154475	0.00106481	0.0072453	Positively correlated
SPIN1	9q22.1	0.154459	0.00106607	0.00725064	Positively correlated
ATXN1L	16q22.2	0.154317	0.00107763	0.00732016	Positively correlated
C2CD4D-AS1	1q21.3	0.154289	0.00107989	0.00732881	Positively correlated
GRB14	2q24.3	0.154287	0.00108008	0.00732881	Positively correlated
ZBTB41	1q31.3	0.154279	0.00108074	0.00732881	Positively correlated
C4ORF3	4q26	0.154262	0.00108211	0.00733561	Positively correlated
OSCP1	1p34.3	0.154211	0.00108631	0.00735665	Positively correlated
ATL2	2p22.2-p22.1	0.15412	0.00109384	0.00740107	Positively correlated
CYP3A7	7q22.1	0.154117	0.00109405	0.00740107	Positively correlated
MYH8	17p13.1	0.15411	0.00109468	0.00740107	Positively correlated
AFG3L2	18p11.21	0.15407	0.00109795	0.00741792	Positively correlated
PMF1	1q22	0.154041	0.00110036	0.00742518	Positively correlated
SYTL3	6q25.3	0.154035	0.00110085	0.00742518	Positively correlated
RCBTB2	13q14.2	0.154029	0.00110135	0.00742518	Positively correlated
PTGER3	1p31.1	0.153998	0.00110397	0.00743672	Positively correlated
DNTTIP2	1p22.1	0.153943	0.00110853	0.00746425	Positively correlated
ZBTB10	8q21.13	0.153874	0.00111437	0.00749344	Positively correlated
BANK1	4q24	0.153816	0.00111925	0.00752126	Positively correlated
KHDRBS3	8q24.23	0.153734	0.00112619	0.00756283	Positively correlated
CHAMP1	13q34	0.153725	0.00112695	0.00756535	Positively correlated
SCLY	2q37.3	0.153692	0.00112977	0.00758174	Positively correlated
MME	3q25.2	0.153668	0.00113182	0.00759045	Positively correlated
RHOU	1q42.13	0.153654	0.00113302	0.00759593	Positively correlated
L2HGDH	14q21.3	0.153642	0.00113408	0.00760049	Positively correlated
PGAP1	2q33.1	0.153606	0.00113715	0.00761595	Positively correlated
TMEM192	4q32.3	0.153566	0.00114061	0.00762467	Positively correlated
RAD21	8q24.11	0.153564	0.00114073	0.00762467	Positively correlated
MINPP1	10q23.2	0.153535	0.00114326	0.00763903	Positively correlated
MINDY3	10p13	0.153465	0.00114928	0.0076716	Positively correlated
SCN9A	2q24.3	0.153425	0.00115278	0.00769235	Positively correlated
SOX13	1q32.1	0.153379	0.00115683	0.00771051	Positively correlated
ZNF595	4p16.3	0.153374	0.00115722	0.00771051	Positively correlated
EAF2	3q13.33	0.153372	0.00115738	0.00771051	Positively correlated
IGSF8	1q23.2	0.15332	0.00116193	0.00772514	Positively correlated
PHGDH	1p12	0.153297	0.00116401	0.00773637	Positively correlated
PITPNC1	17q24.2	0.15325	0.00116811	0.00775762	Positively correlated
RECK	9p13.3	0.153243	0.00116876	0.00775762	Positively correlated
SEPSECS	4p15.2	0.15318	0.00117427	0.00779167	Positively correlated
POLR1B	2q14.1	0.153161	0.00117594	0.00780017	Positively correlated
PHYHIPL	10q21.1	0.153143	0.00117751	0.00780457	Positively correlated
ZNF462	9q31.2	0.153136	0.00117814	0.00780457	Positively correlated
ARID5B	10q21.2	0.153131	0.00117862	0.00780497	Positively correlated
LYSMD1	1q21.3	0.153094	0.00118188	0.00782403	Positively correlated
LARP6	15q23	0.153075	0.00118362	0.00783292	Positively correlated
SGCE	7q21.3	0.153049	0.00118594	0.00784501	Positively correlated
HSPA4L	4q28.1	0.153045	0.00118623	0.00784501	Positively correlated
CTSF	11q13.2	0.15288	0.00120111	0.00793554	Positively correlated
SNHG5	6q14.3	0.152865	0.00120247	0.00794192	Positively correlated
OR2T10	1q44	0.152818	0.00120671	0.00796477	Positively correlated
IKZF5	10q26.13	0.152818	0.00120672	0.00796477	Positively correlated
FUNDC2P2	2p11.2	0.152726	0.00121506	0.0080145	Positively correlated
LEPROTL1	8p12	0.152702	0.00121723	0.00802355	Positively correlated
DDX60	4q32.3	0.15268	0.00121924	0.00803415	Positively correlated
ZDHHC6	10q25.2	0.152631	0.00122374	0.00805053	Positively correlated
PTPRN2	7q36.3	0.152616	0.00122508	0.00805257	Positively correlated
AGPS	2q31.2	0.152607	0.00122591	0.00805426	Positively correlated
CYP4X1	1p33	0.152585	0.00122799	0.00806265	Positively correlated
NDFIP2	13q31.1	0.152543	0.00123186	0.00808009	Positively correlated
PDZD2	5p13.3	0.152535	0.00123255	0.00808195	Positively correlated
CUEDC1	17q22	0.15241	0.00124416	0.00815274	Positively correlated
MFAP3	5q33.2	0.152397	0.00124542	0.00815834	Positively correlated
DLC1	8p22	0.15238	0.00124699	0.00816597	Positively correlated
VAV3	1p13.3	0.152299	0.00125456	0.00820215	Positively correlated
TRAF3IP2	6q21	0.152224	0.00126161	0.00824015	Positively correlated
RHOBTB1	10q21.2	0.152209	0.00126304	0.00824681	Positively correlated
BRMS1L	14q13.2	0.152112	0.00127229	0.0082937	Positively correlated
GPR176	15q14-q15.1	0.1521	0.0012734	0.00829822	Positively correlated
DGKK	Xp11.22	0.152034	0.00127969	0.00833377	Positively correlated
STX17	9q31.1	0.152021	0.00128096	0.00833938	Positively correlated
AOX1	2q33.1	0.152013	0.0012817	0.00834148	Positively correlated
TNNI3K	1p31.1	0.151984	0.00128449	0.00834878	Positively correlated
CTAGE10P	13q14.2	0.151942	0.00128849	0.00836937	Positively correlated
RRP15	1q41	0.151888	0.00129372	0.00838697	Positively correlated
FUNDC2	Xq28	0.151849	0.00129754	0.00840525	Positively correlated
ASPRV1	2p13.3	0.151822	0.00130014	0.0084177	Positively correlated
TDRD7	9q22.33	0.151703	0.00131173	0.00847631	Positively correlated
ZNF184	6p22.1	0.151641	0.00131785	0.00850629	Positively correlated
GLB1L3	11q25	0.151639	0.00131807	0.00850629	Positively correlated
PRSS16	6p22.1	0.151612	0.00132072	0.00852066	Positively correlated
DHFR2	3q11.2	0.151401	0.00134158	0.00864414	Positively correlated
VEGFA	6p21.1	0.15137	0.00134471	0.00865871	Positively correlated
MAT2A	2p11.2	0.151354	0.00134636	0.00866191	Positively correlated
DDX50	10q22.1	0.151327	0.00134906	0.00867277	Positively correlated
DMXL1	5q23.1	0.151303	0.00135141	0.0086851	Positively correlated
TENM1	Xq25	0.151231	0.00135867	0.00872615	Positively correlated
HEATR5B	2p22.2	0.151179	0.00136394	0.00875231	Positively correlated
MARCHF7	2q24.2	0.151132	0.00136871	0.0087794	Positively correlated
PCDHGB7	5q31.3	0.151126	0.00136935	0.00878065	Positively correlated
FCAMR	1q32.1	0.151099	0.00137208	0.00879455	Positively correlated
IFT57	3q13.12-q13.13	0.151069	0.00137515	0.00880378	Positively correlated
HSPA1L	6p21.33	0.151022	0.00137995	0.00882322	Positively correlated
GJA5	1q21.2	0.151016	0.0013806	0.00882457	Positively correlated
TXLNG	Xp22.2	0.151	0.00138223	0.00882937	Positively correlated
SEBOX	17q11.2	0.150941	0.00138836	0.00885719	Positively correlated
DENND4C	9p22.1	0.150915	0.00139101	0.0088713	Positively correlated
TRIM23	5q12.3	0.150838	0.001399	0.00891372	Positively correlated
ARHGAP31	3q13.32-q13.33	0.15081	0.00140192	0.0089238	Positively correlated
FAM177A1	14q13.2	0.150709	0.00141241	0.00897633	Positively correlated
ATP11AUN	13q34	0.150575	0.00142658	0.00905489	Positively correlated
DZIP3	3q13.13	0.150521	0.00143229	0.00908476	Positively correlated
CISD2	4q24	0.150446	0.00144028	0.00911148	Positively correlated
USP37	2q35	0.150444	0.0014405	0.00911148	Positively correlated
AGBL3	7q33	0.150332	0.00145241	0.00917521	Positively correlated
ZNF318	6p21.1	0.150294	0.00145653	0.00919838	Positively correlated
PWARSN	15q11.2	0.150273	0.00145884	0.00920557	Positively correlated
UBR2	6p21.1	0.150241	0.00146222	0.00922268	Positively correlated
HMGN2P46	15q21.1	0.150179	0.00146902	0.00925393	Positively correlated
CYP3A4	7q22.1	0.150161	0.00147091	0.00926292	Positively correlated
KIF1B	1p36.22	0.150035	0.00148473	0.00933821	Positively correlated
SLC16A2	Xq13.2	0.150017	0.00148663	0.00934718	Positively correlated
IL17RD	3p14.3	0.149964	0.00149253	0.00937546	Positively correlated
CIT	12q24.23	0.14993	0.00149625	0.00939296	Positively correlated
ACVRL1	12q13.13	0.149728	0.00151874	0.00950203	Positively correlated
ROCK2	2p25.1	0.149717	0.00151994	0.00950594	Positively correlated
EFCAB7	1p31.3	0.149699	0.00152196	0.00951261	Positively correlated
PRXL2C	9q22.33	0.149665	0.00152582	0.00953079	Positively correlated
PPP1R2B	5q33.3	0.149563	0.00153733	0.0095931	Positively correlated
LINC01587	4p16.2	0.149557	0.00153801	0.0095931	Positively correlated
LYRM7	5q23.3-q31.1	0.149505	0.00154392	0.00962198	Positively correlated
HNRNPA1	12q13.13	0.149502	0.00154426	0.00962198	Positively correlated
UTRN	6q24.2	0.149495	0.00154499	0.00962333	Positively correlated
SPositively correlatedT3H	6p21.1	0.149491	0.00154544	0.00962333	Positively correlated
SEC14L1	17q25.2-q25.3	0.149351	0.00156146	0.00970195	Positively correlated
C11ORF1	11q23.1	0.149282	0.00156948	0.00974384	Positively correlated
RHOV	15q15.1	0.14928	0.00156966	0.00974384	Positively correlated
KRBA1	7q36.1	0.149264	0.00157145	0.00975197	Positively correlated
OSBP	11q12.1	0.149255	0.00157257	0.00975407	Positively correlated
PTPRR	12q15	0.149245	0.00157375	0.00975415	Positively correlated
CDH4	20q13.33	0.14922	0.00157665	0.00976354	Positively correlated
TIGD4	4q31.3	0.14921	0.00157774	0.0097668	Positively correlated
PTH2R	2q34	0.149127	0.0015874	0.00980841	Positively correlated
CDON	11q24.2	0.149122	0.00158795	0.00980874	Positively correlated
SLC35A5	3q13.2	0.149091	0.00159156	0.00982502	Positively correlated
ALOX12B	17p13.1	0.148983	0.0016043	0.00989538	Positively correlated
DPY19L2P4	7q21.13	0.148982	0.00160444	0.00989538	Positively correlated
PGA3	11q12.2	0.148977	0.00160498	0.00989567	Positively correlated
CD300LG	17q21.31	0.148962	0.00160674	0.00990347	Positively correlated
ABI2	2q33.2	0.148923	0.00161134	0.0099196	Positively correlated
GCLC	6p12.1	0.148913	0.00161253	0.00992084	Positively correlated
GALNT9	12q24.33	0.14883	0.00162241	0.00996934	Positively correlated
CHD9	16q12.2	0.148723	0.00163523	0.0100389	Positively correlated
B3GALT1	2q24.3	0.148635	0.00164578	0.0100913	Positively correlated
THSD1	13q14.3	0.148625	0.00164697	0.0100955	Positively correlated
TOB2	22q13.2	0.148618	0.0016478	0.0100975	Positively correlated
CD109	6q13	0.148614	0.00164833	0.0100977	Positively correlated
CALM1	14q32.11	0.148599	0.00165012	0.0101024	Positively correlated
ZNF22	10q11.21	0.14858	0.00165243	0.0101104	Positively correlated
TXNDC15	5q31.1	0.148553	0.00165567	0.0101271	Positively correlated
ASCC1	10q22.1	0.148533	0.00165805	0.0101352	Positively correlated
PKN2	1p22.2	0.14853	0.0016585	0.0101352	Positively correlated
MMAA	4q31.21	0.148478	0.0016648	0.0101675	Positively correlated
PTAR1	9q21.12	0.148226	0.0016958	0.010319	Positively correlated
CIART	1q21.2	0.148178	0.00170167	0.0103516	Positively correlated
SPIRE1	18p11.21	0.148073	0.00171475	0.0104185	Positively correlated
ADCY2	5p15.31	0.14806	0.00171644	0.0104256	Positively correlated
TIPIN	15q22.31	0.148039	0.0017191	0.0104386	Positively correlated
DIXDC1	11q23.1	0.147985	0.0017258	0.010473	Positively correlated
SLC17A3	6p22.2	0.147956	0.00172957	0.0104863	Positively correlated
LINC02897	1q44	0.147928	0.00173308	0.0105012	Positively correlated
EPRS1	1q41	0.147901	0.00173642	0.0105183	Positively correlated
TIMP4	3p25.2	0.147892	0.00173757	0.010522	Positively correlated
PWP1	12q23.3	0.147845	0.00174362	0.0105492	Positively correlated
TENT4B	16q12.1	0.147783	0.00175148	0.0105935	Positively correlated
TXNIP	1q21.1	0.147738	0.00175725	0.0106243	Positively correlated
BEST3	12q15	0.147735	0.00175764	0.0106243	Positively correlated
SNX30	9q32	0.147722	0.00175927	0.0106278	Positively correlated
NR2F1	5q15	0.147592	0.00177596	0.0107016	Positively correlated
PER2	2q37.3	0.147586	0.00177675	0.0107016	Positively correlated
PACSIN3	11p11.2	0.147581	0.00177737	0.0107016	Positively correlated
PCLO	7q21.11	0.147568	0.00177917	0.010706	Positively correlated
STAM	10p12.33	0.147523	0.00178495	0.0107247	Positively correlated
IARS2	1q41	0.147517	0.00178568	0.0107258	Positively correlated
DOC2A	16p11.2	0.147431	0.00179691	0.0107869	Positively correlated
NDNF	4q27	0.147415	0.001799	0.0107961	Positively correlated
STXBP3	1p13.3	0.147408	0.00179995	0.0107986	Positively correlated
CACNA1D	3p21.1	0.147388	0.00180256	0.0108047	Positively correlated
NIPAL3	1p36.11	0.147388	0.00180258	0.0108047	Positively correlated
MTMR12	5p13.3	0.147377	0.00180395	0.0108097	Positively correlated
DHRS4	14q11.2	0.147371	0.00180484	0.0108118	Positively correlated
GRHPR	9p13.2	0.147362	0.00180597	0.0108121	Positively correlated
RCOR3	1q32.2-q32.3	0.147345	0.00180819	0.0108221	Positively correlated
PDIK1L	1p36.11	0.147328	0.0018105	0.0108323	Positively correlated
RBBP9	20p11.23	0.147309	0.00181288	0.0108405	Positively correlated
TMEM204	16p13.3	0.147081	0.00184318	0.011002	Positively correlated
IREB2	15q25.1	0.147029	0.00185021	0.0110406	Positively correlated
SRP9	1q42.12	0.146977	0.00185717	0.0110756	Positively correlated
GGT1	22q11.23	0.14697	0.0018581	0.0110778	Positively correlated
AMN	14q32.32	0.146711	0.00189332	0.0112543	Positively correlated
CDH5	16q21	0.146688	0.0018964	0.0112692	Positively correlated
KALRN	3q21.1-q21.2	0.146683	0.00189717	0.0112701	Positively correlated
LIN9	1q42.12	0.146648	0.00190201	0.0112892	Positively correlated
EFCC1	3q21.3	0.146615	0.00190647	0.0113124	Positively correlated
RNF139	8q24.13	0.146573	0.00191228	0.0113434	Positively correlated
PALMD	1p21.2	0.146551	0.00191539	0.0113551	Positively correlated
NECAB2	16q23.3	0.146534	0.00191773	0.0113657	Positively correlated
CHM	Xq21.2	0.146477	0.00192561	0.0114056	Positively correlated
C6ORF89	6p21.2	0.146371	0.00194046	0.0114665	Positively correlated
SLC5A4	22q12.3	0.146306	0.00194961	0.0115135	Positively correlated
NPositively correlated62CL	Xq22.3	0.146276	0.00195385	0.011532	Positively correlated
XPA	9q22.33	0.146246	0.00195809	0.0115536	Positively correlated
ZNF25	10p11.21	0.146231	0.00196011	0.01156	Positively correlated
KLF9	9q21.12	0.146176	0.00196791	0.0115945	Positively correlated
TMTC2	12q21.31	0.146154	0.00197106	0.0116028	Positively correlated
DYNC1I2	2q31.1	0.146141	0.00197295	0.0116084	Positively correlated
WDR64	1q43	0.146126	0.00197513	0.0116165	Positively correlated
ZNF684	1p34.2	0.146079	0.0019818	0.0116523	Positively correlated
RNF41	12q13.3	0.146056	0.00198501	0.0116609	Positively correlated
SLC35D2	9q22.32	0.146047	0.00198635	0.0116619	Positively correlated
LANCL1	2q34	0.146031	0.00198863	0.0116719	Positively correlated
COG2	1q42.2	0.146024	0.0019897	0.0116748	Positively correlated
ACBD3	1q42.12	0.146002	0.00199282	0.0116862	Positively correlated
NOVA1	14q12	0.145916	0.00200513	0.0117481	Positively correlated
ABHD1	2p23.3	0.14591	0.00200613	0.0117505	Positively correlated
CCDC150	2q33.1	0.145876	0.00201099	0.0117687	Positively correlated
ETS2	21q22.2	0.145794	0.00202286	0.0118243	Positively correlated
KDM6A	Xp11.3	0.145758	0.00202821	0.0118521	Positively correlated
CYB5R1	1q32.1	0.145734	0.00203162	0.0118686	Positively correlated
SPATA22	17p13.2	0.145657	0.00204291	0.0119241	Positively correlated
SARS1	1p13.3	0.145591	0.00205263	0.0119669	Positively correlated
PPFIBP1	12p11.23-p11.22	0.145474	0.00206996	0.0120609	Positively correlated
GUCY1B1	4q32.1	0.145322	0.00209272	0.012182	Positively correlated
NPY1R	4q32.2	0.145288	0.00209778	0.0122017	Positively correlated
USP46	4q12	0.14527	0.0021006	0.012211	Positively correlated
RNF11	1p32.3	0.145229	0.00210666	0.0122356	Positively correlated
F2RL1	5q13.3	0.145189	0.00211279	0.012265	Positively correlated
YWHAE	17p13.3	0.145188	0.00211294	0.012265	Positively correlated
FHIP1A	4q31.3	0.145142	0.00211985	0.0122979	Positively correlated
TSPYL1	6q22.1	0.145134	0.00212108	0.0123015	Positively correlated
SLC44A3	1p21.3	0.145121	0.0021231	0.0123097	Positively correlated
SMC3	10q25.2	0.145075	0.00213015	0.0123398	Positively correlated
MARCHF6	5p15.2	0.145071	0.00213079	0.01234	Positively correlated
NT5C3B	17q21.2	0.145018	0.00213882	0.0123805	Positively correlated
TRAPPC3L	6q22.1	0.144975	0.00214543	0.0124104	Positively correlated
TAF3	10p14	0.144943	0.00215029	0.0124349	Positively correlated
RBM22	5q33.1	0.144904	0.00215638	0.012463	Positively correlated
ARHGEF37	5q32	0.144877	0.0021606	0.0124739	Positively correlated
CYSLTR1	Xq21.1	0.144782	0.0021753	0.012547	Positively correlated
DACH1	13q21.33	0.144778	0.00217594	0.012547	Positively correlated
PDE8A	15q25.3	0.144771	0.00217697	0.0125494	Positively correlated
ZNF204P	6p22.1	0.144742	0.00218159	0.0125724	Positively correlated
PM20D2	6q15	0.144729	0.00218355	0.0125801	Positively correlated
DZIP1	13q32.1	0.144723	0.00218446	0.0125817	Positively correlated
PGK1	Xq21.1	0.144701	0.0021879	0.0125979	Positively correlated
NFXL1	4p12	0.144646	0.00219659	0.0126406	Positively correlated
KCNJ16	17q24.3	0.14462	0.00220069	0.0126497	Positively correlated
TNK1	17p13.1	0.144588	0.00220573	0.0126679	Positively correlated
KLF12	13q22.1	0.144587	0.0022059	0.0126679	Positively correlated
PHACTR2	6q24.2	0.144468	0.00222472	0.0127549	Positively correlated
HLA-E	6p22.1	0.144449	0.00222772	0.0127648	Positively correlated
NOC3L	10q23.33	0.144394	0.00223647	0.012804	Positively correlated
VEZF1	17q22	0.144326	0.00224734	0.0128471	Positively correlated
H1-6	6p22.2	0.144283	0.00225431	0.0128729	Positively correlated
SEPHS2	16p11.2	0.144251	0.00225934	0.0128915	Positively correlated
TMEM106A	17q21.31	0.144237	0.00226171	0.0128969	Positively correlated
DPY19L2P2	7q22.1	0.144203	0.00226707	0.0129163	Positively correlated
CDKL3	5q31.1	0.14419	0.00226916	0.0129246	Positively correlated
TMEM176B	7q36.1	0.144165	0.00227326	0.0129332	Positively correlated
STXBP4	17q22	0.14414	0.00227733	0.0129527	Positively correlated
PCDHGB1	5q31	0.144122	0.00228029	0.0129659	Positively correlated
SLITRK5	13q31.2	0.14409	0.00228543	0.0129772	Positively correlated
CYP39A1	6p12.3	0.14409	0.00228552	0.0129772	Positively correlated
GBP4	1p22.2	0.144085	0.00228635	0.0129782	Positively correlated
SCD5	4q21.22	0.14408	0.00228714	0.012979	Positively correlated
EFCAB14	1p33	0.144071	0.00228855	0.0129834	Positively correlated
H2BC4	6p22.2	0.144052	0.00229158	0.0129969	Positively correlated
ZMPSTE24	1p34.2	0.144028	0.0022956	0.013004	Positively correlated
ACP5	19p13.2	0.144019	0.00229703	0.0130057	Positively correlated
LINC00887	3q29	0.143998	0.00230047	0.0130141	Positively correlated
SMIM24	19p13.3	0.14399	0.00230187	0.0130184	Positively correlated
RACK1	5q35.3	0.143948	0.00230871	0.0130423	Positively correlated
FCHO2	5q13.2	0.143908	0.00231522	0.0130717	Positively correlated
HAVCR1	5q33.3	0.143897	0.00231702	0.0130782	Positively correlated
RERGL	12p12.3	0.143869	0.00232174	0.0130938	Positively correlated
TMC7	16p12.3	0.143865	0.00232243	0.013094	Positively correlated
TRIM39	6p22.1	0.143827	0.0023287	0.0131236	Positively correlated
ASRGL1	11q12.3	0.143799	0.00233324	0.0131402	Positively correlated
DSCAML1	11q23.3	0.143789	0.00233489	0.0131441	Positively correlated
DBNDD1	16q24.3	0.143787	0.00233525	0.0131441	Positively correlated
ZNF473	19q13.33	0.143618	0.00236349	0.0132844	Positively correlated
FHL5	6q16.1	0.143509	0.00238184	0.0133725	Positively correlated
CA14	1q21.2	0.143458	0.00239057	0.0134067	Positively correlated
TIMM9	14q23.1	0.143457	0.00239061	0.0134067	Positively correlated
APLNR	11q12.1	0.143452	0.00239151	0.013408	Positively correlated
CA2	8q21.2	0.143439	0.00239374	0.0134167	Positively correlated
TATDN1	8q24.13	0.143426	0.00239592	0.0134214	Positively correlated
MACIR	5q21.1	0.143421	0.00239684	0.013422	Positively correlated
UBXN10	1p36.12	0.143373	0.00240495	0.0134595	Positively correlated
LRP6	12p13.2	0.143351	0.00240872	0.0134706	Positively correlated
CLRN1-AS1	3q25.1	0.143323	0.00241343	0.0134856	Positively correlated
HS2ST1	1p22.3	0.143314	0.00241502	0.0134906	Positively correlated
CWF19L2	11q22.3	0.143303	0.00241694	0.0134939	Positively correlated
LRRC8C	1p22.2	0.143261	0.00242408	0.0135262	Positively correlated
JHY	11q24.1	0.143222	0.00243085	0.0135489	Positively correlated
GCSAML	1q44	0.14317	0.00243978	0.0135911	Positively correlated
GRIA3	Xq25	0.14316	0.00244159	0.013595	Positively correlated
IPO11	5q12.1	0.143158	0.00244183	0.013595	Positively correlated
ZNF143	11p15.4	0.143151	0.00244314	0.0135985	Positively correlated
MUC4	3q29	0.143064	0.00245825	0.0136515	Positively correlated
SRSF3	6p21.31-p21.2	0.143058	0.00245923	0.0136515	Positively correlated
BCAS2	1p13.2	0.143051	0.00246048	0.0136533	Positively correlated
PIEZO2	18p11.22-p11.21	0.143024	0.0024651	0.0136714	Positively correlated
CXXC5	5q31.2	0.142919	0.00248362	0.0137624	Positively correlated
KAT5	11q13.1	0.142915	0.00248427	0.0137624	Positively correlated
GNAT3	7q21.11	0.142901	0.00248675	0.0137686	Positively correlated
UBTD2	5q35.1	0.142795	0.00250534	0.0138546	Positively correlated
PURB	7p13	0.142729	0.00251705	0.0139063	Positively correlated
SLC30A8	8q24.11	0.142645	0.00253205	0.0139769	Positively correlated
TMEM232	5q22.1	0.142597	0.0025406	0.0140202	Positively correlated
TRIM13	13q14.2	0.142582	0.00254332	0.0140313	Positively correlated
GRM3	7q21.11-q21.12	0.142536	0.00255167	0.0140697	Positively correlated
CCT4	2p15	0.142493	0.00255939	0.0141006	Positively correlated
YTHDF2	1p35.3	0.142486	0.00256066	0.0141037	Positively correlated
DOCK1	10q26.2	0.142453	0.00256661	0.0141247	Positively correlated
UTP23	8q24.11	0.142421	0.00257236	0.0141411	Positively correlated
PTPRG	3p14.2	0.142408	0.00257478	0.0141415	Positively correlated
DUSP6	12q21.33	0.142405	0.00257529	0.0141415	Positively correlated
PIGX	3q29	0.14239	0.00257813	0.0141464	Positively correlated
ZBED9	6p22.1	0.142374	0.00258103	0.0141575	Positively correlated
SNX29	16p13.13-p13.12	0.142355	0.00258442	0.0141722	Positively correlated
ZNF622	5p15.1	0.142318	0.00259117	0.0141937	Positively correlated
P2RY1	3q25.2	0.142241	0.00260518	0.0142655	Positively correlated
PLCL2	3p24.3	0.142239	0.0026057	0.0142655	Positively correlated
SLC9A3R2	16p13.3	0.142214	0.00261025	0.0142765	Positively correlated
PXMP2	12q24.33	0.142171	0.00261822	0.0142989	Positively correlated
NOTCH4	6p21.32	0.14215	0.00262197	0.0143154	Positively correlated
TMEM167B	1p13.3	0.142085	0.00263396	0.014377	Positively correlated
RASAL1	12q24.13	0.142081	0.00263484	0.0143779	Positively correlated
RGSL1	1q25.3	0.141982	0.00265319	0.0144544	Positively correlated
EZR	6q25.3	0.14197	0.00265549	0.0144629	Positively correlated
INF2	14q32.33	0.141962	0.00265698	0.0144671	Positively correlated
HCG11	6p22.2	0.14195	0.00265916	0.0144751	Positively correlated
RBM15	1p13.3	0.141943	0.00266038	0.0144773	Positively correlated
TYMS	18p11.32	0.141919	0.00266491	0.0144906	Positively correlated
ZNF252P	8q24.3	0.141909	0.00266691	0.0144976	Positively correlated
VAT1	17q21.31	0.141903	0.00266795	0.0144993	Positively correlated
EPB41L1	20q11.23	0.14183	0.00268169	0.0145463	Positively correlated
KBTBD3	11q22.3	0.141788	0.00268955	0.0145838	Positively correlated
NOC2LP2	2q21.1	0.141711	0.00270415	0.0146325	Positively correlated
ZNF433	19p13.2	0.141622	0.0027212	0.0147168	Positively correlated
FOSB	19q13.32	0.141617	0.00272203	0.0147173	Positively correlated
PRDX3	10q26.11	0.141588	0.00272754	0.0147431	Positively correlated
TCTN2	12q24.31	0.141504	0.00274382	0.0148231	Positively correlated
LINC00410	13q31.3	0.141487	0.00274707	0.0148289	Positively correlated
RARS1	5q34	0.141486	0.00274711	0.0148289	Positively correlated
TRPC6	11q22.1	0.141458	0.00275261	0.0148546	Positively correlated
ST7-AS1	7q31.2	0.141437	0.0027567	0.0148679	Positively correlated
SLF1	5q15	0.141434	0.0027573	0.0148679	Positively correlated
DHX15	4p15.2	0.141396	0.00276448	0.0148946	Positively correlated
SSX2IP	1p22.3	0.141336	0.00277628	0.0149541	Positively correlated
TMEM106B	7p21.3	0.141328	0.00277781	0.0149543	Positively correlated
CASQ2	1p13.1	0.141288	0.00278547	0.0149875	Positively correlated
SYN3	22q12.3	0.141139	0.0028148	0.015125	Positively correlated
ABCA8	17q24.2	0.141028	0.00283674	0.015233	Positively correlated
CSTF2T	10q21.1	0.141006	0.00284099	0.0152494	Positively correlated
ZC3H14	14q31.3	0.140947	0.00285275	0.0153043	Positively correlated
ALG10B	12q12	0.140886	0.0028649	0.0153457	Positively correlated
CDKL2	4q21.1	0.140882	0.00286578	0.0153457	Positively correlated
LRRTM2	5q31.2	0.140785	0.0028852	0.0154327	Positively correlated
ALDOC	17q11.2	0.140756	0.00289112	0.0154522	Positively correlated
SKAP2	7p15.2	0.140686	0.00290526	0.0155154	Positively correlated
RGS7	1q43	0.140639	0.00291485	0.0155583	Positively correlated
PHF3	6q12	0.140546	0.00293378	0.0156177	Positively correlated
ZNF639	3q26.33	0.140492	0.00294482	0.01567	Positively correlated
PGPEP1	19p13.11	0.14049	0.00294518	0.01567	Positively correlated
PTGR2	14q24.3	0.140486	0.00294594	0.01567	Positively correlated
MTERF4	2q37.3	0.140438	0.00295592	0.0157147	Positively correlated
LIN52	14q24.3	0.140351	0.00297385	0.0157974	Positively correlated
GLIPR1L2	12q21.2	0.14028	0.00298856	0.0158637	Positively correlated
TEF	22q13.2	0.140181	0.0030091	0.0159551	Positively correlated
JADE2	5q31.1	0.140136	0.00301872	0.0159976	Positively correlated
CLEC1A	12p13.2	0.14003	0.00304091	0.016098	Positively correlated
STARD6	18q21.2	0.140029	0.00304113	0.016098	Positively correlated
TIAL1	10q26.11	0.140026	0.00304168	0.016098	Positively correlated
MAF	16q23.2	0.139999	0.00304739	0.016124	Positively correlated
HSPA12B	20p13	0.139972	0.00305328	0.0161508	Positively correlated
CASC3	17q21.1	0.139944	0.00305925	0.0161739	Positively correlated
MIER3	5q11.2	0.139881	0.00307253	0.0162265	Positively correlated
NRAS	1p13.2	0.139867	0.00307554	0.0162343	Positively correlated
DBP	19q13.33	0.139834	0.00308251	0.0162668	Positively correlated
RSL24D1	15q21.3	0.139828	0.00308378	0.0162692	Positively correlated
RDH14	2p24.2	0.13977	0.00309639	0.0163143	Positively correlated
CABCOCO1	10q21.2	0.139759	0.00309863	0.0163218	Positively correlated
DDX20	1p13.2	0.139747	0.00310127	0.0163314	Positively correlated
ACADL	2q34	0.139737	0.00310332	0.0163343	Positively correlated
USP33	1p31.1	0.139737	0.00310345	0.0163343	Positively correlated
ZNF879	5q35.3	0.139708	0.00310973	0.0163588	Positively correlated
KBTBD11	8p23.3	0.139596	0.00313387	0.0164469	Positively correlated
DCAF12	9p13.3	0.139585	0.00313629	0.016451	Positively correlated
SKP1	5q31.1	0.139563	0.00314108	0.0164705	Positively correlated
PDK4	7q21.3	0.139532	0.00314773	0.0164853	Positively correlated
TPMT	6p22.3	0.139429	0.00317025	0.01659	Positively correlated
KIAA1586	6p12.1	0.139399	0.00317693	0.0166162	Positively correlated
ZMYND11	10p15.3	0.139359	0.00318572	0.0166392	Positively correlated
PRPS1	Xq22.3	0.139353	0.00318692	0.0166392	Positively correlated
USHBP1	19p13.11	0.139352	0.00318714	0.0166392	Positively correlated
TNIP1	5q33.1	0.139339	0.00319017	0.0166507	Positively correlated
ABCB1	7q21.12	0.13923	0.00321427	0.016759	Positively correlated
ACTL6A	3q26.33	0.139224	0.00321552	0.0167612	Positively correlated
FTO	16q12.2	0.13919	0.00322302	0.0167872	Positively correlated
PALS2	7p15.3	0.139182	0.00322495	0.0167929	Positively correlated
TBC1D8B	Xq22.3	0.139172	0.00322715	0.0167956	Positively correlated
LAYN	11q23.1	0.139138	0.0032348	0.016823	Positively correlated
STAT5B	17q21.2	0.139137	0.00323494	0.016823	Positively correlated
DOCK9	13q32.3	0.138999	0.00326599	0.0169713	Positively correlated
MAGEH1	Xp11.21	0.138919	0.00328397	0.0170559	Positively correlated
PINK1	1p36.12	0.138875	0.00329387	0.0170895	Positively correlated
RSAD2	2p25.2	0.138865	0.00329612	0.0170968	Positively correlated
LXN	3q25.32	0.138854	0.00329877	0.0171061	Positively correlated
LINC01139	1q43	0.138845	0.00330074	0.0171097	Positively correlated
TSSK1B	5q22.2	0.138711	0.00333144	0.017222	Positively correlated
CERK	22q13.31	0.13866	0.00334315	0.0172684	Positively correlated
LURAP1L	9p23	0.138657	0.00334386	0.0172684	Positively correlated
EPC1	10p11.22	0.138648	0.00334586	0.0172743	Positively correlated
RPL36AL	14q21.3	0.138552	0.00336803	0.0173753	Positively correlated
NUBPL	14q12	0.138511	0.00337759	0.0174069	Positively correlated
LINC01020	5p15.32	0.138507	0.0033785	0.0174069	Positively correlated
SELENOP	5p12	0.138451	0.00339144	0.0174545	Positively correlated
NDRG2	14q11.2	0.138449	0.00339209	0.0174545	Positively correlated
ECHDC3	10p14	0.138437	0.00339488	0.0174599	Positively correlated
SNAPC1	14q23.2	0.138359	0.00341298	0.0175342	Positively correlated
APOM	6p21.33	0.138358	0.00341327	0.0175342	Positively correlated
DDX58	9p21.1	0.138327	0.00342056	0.0175559	Positively correlated
FBXW11	5q35.1	0.138302	0.00342638	0.0175723	Positively correlated
NETO2	16q12.1	0.138277	0.00343232	0.0175972	Positively correlated
NEGR1	1p31.1	0.138274	0.00343301	0.0175972	Positively correlated
DCAF7	17q23.3	0.138227	0.00344414	0.0176302	Positively correlated
MPP7	10p12.1	0.138225	0.00344472	0.0176302	Positively correlated
ZNF136	19p13.2	0.138203	0.00344984	0.0176474	Positively correlated
NRG3	10q23.1	0.138177	0.00345611	0.0176704	Positively correlated
DNAL1	14q24.3	0.138132	0.00346676	0.0177068	Positively correlated
HERC5	4q22.1	0.13812	0.00346957	0.0177167	Positively correlated
UBE2B	5q31.1	0.138013	0.00349502	0.0177967	Positively correlated
IPO5	13q32.2	0.138003	0.00349755	0.017805	Positively correlated
PIGH	14q24.1	0.137977	0.00350365	0.0178285	Positively correlated
SLC25A24	1p13.3	0.137976	0.00350393	0.0178285	Positively correlated
JKAMP	14q23.1	0.137969	0.00350573	0.0178331	Positively correlated
VPS54	2p15-p14	0.137963	0.00350711	0.0178356	Positively correlated
BHLHB9	Xq22.1	0.137876	0.00352798	0.0179326	Positively correlated
PLEKHA2	8p11.22	0.13784	0.00353672	0.0179543	Positively correlated
PCGF5	10q23.32	0.137823	0.00354095	0.0179712	Positively correlated
MAGIX	Xp11.23	0.137767	0.00355462	0.0180269	Positively correlated
ANK2	4q25-q26	0.137731	0.00356328	0.0180491	Positively correlated
TAL1	1p33	0.13773	0.00356352	0.0180491	Positively correlated
LRRC42	1p32.3	0.137703	0.00357022	0.0180785	Positively correlated
ZFP2	5q35.3	0.137631	0.00358786	0.0181457	Positively correlated
MOB4	2q33.1	0.137612	0.00359234	0.018163	Positively correlated
VIPR1	3p22.1	0.137591	0.00359758	0.0181849	Positively correlated
MCCC1	3q27.1	0.137569	0.00360299	0.0182076	Positively correlated
CYP51A1	7q21.2	0.137522	0.00361467	0.0182574	Positively correlated
ZXDB	Xp11.21	0.137503	0.00361923	0.0182759	Positively correlated
MEGF9	9q33.2	0.13749	0.00362256	0.0182881	Positively correlated
GTF2H4	6p21.33	0.137472	0.0036269	0.0182936	Positively correlated
C21ORF62-AS1	21q22.11	0.137467	0.00362822	0.0182936	Positively correlated
BRD3OS	9q34.2	0.137447	0.00363309	0.0183136	Positively correlated
KLHL7	7p15.3	0.137434	0.00363627	0.0183183	Positively correlated
FAM3D	3p14.2	0.137433	0.00363661	0.0183183	Positively correlated
MCF2L	13q34	0.137429	0.00363761	0.0183183	Positively correlated
ANAPC16	10q22.1	0.137425	0.00363864	0.0183183	Positively correlated
STEAP4	7q21.12	0.137421	0.00363951	0.0183183	Positively correlated
CCDC178	18q12.1	0.137409	0.00364271	0.0183298	Positively correlated
RNF13	3q25.1	0.137392	0.00364688	0.0183461	Positively correlated
FAM174A	5q21.1	0.137367	0.00365302	0.0183678	Positively correlated
CHML	1q43	0.137361	0.00365445	0.0183704	Positively correlated
AKAP6	14q12	0.137325	0.00366348	0.018396	Positively correlated
KCNB1	20q13.13	0.137323	0.00366415	0.018396	Positively correlated
NLGN1	3q26.31	0.137271	0.003677	0.0184559	Positively correlated
EBAG9	8q23.2	0.137215	0.00369126	0.0185229	Positively correlated
TOGARAM1	14q21.2	0.137206	0.00369347	0.0185293	Positively correlated
SEMA5A	5p15.31	0.137155	0.00370639	0.0185802	Positively correlated
POLE3	9q32	0.137139	0.00371038	0.0185955	Positively correlated
ECSCR	5q31.2	0.137119	0.00371548	0.0186118	Positively correlated
HACE1	6q16.3	0.137044	0.00373435	0.0186876	Positively correlated
RBM12	20q11.22	0.137035	0.00373681	0.0186953	Positively correlated
NOL11	17q24.2	0.137015	0.00374178	0.0187061	Positively correlated
CAT	11p13	0.137001	0.00374528	0.0187189	Positively correlated
SLC47A2	17p11.2	0.13698	0.00375072	0.0187367	Positively correlated
NID2	14q22.1	0.13692	0.00376607	0.01879	Positively correlated
C9ORF50	9q34.11	0.136879	0.00377659	0.0188378	Positively correlated
TEX10	9q31.1	0.136849	0.00378429	0.0188715	Positively correlated
PNMA6A	Xq28	0.136795	0.00379839	0.0189327	Positively correlated
ATG4C	1p31.3	0.136777	0.00380292	0.0189497	Positively correlated
KCTD3	1q41	0.136774	0.00380376	0.0189497	Positively correlated
MCFD2	2p21	0.136742	0.00381213	0.0189773	Positively correlated
MARF1	16p13.11	0.136731	0.00381492	0.0189865	Positively correlated
LHX8	1p31.1	0.136713	0.00381952	0.0189999	Positively correlated
SOX6	11p15.2	0.136709	0.00382063	0.0190007	Positively correlated
CASR	3q13.33-q21.1	0.136641	0.00383817	0.0190643	Positively correlated
SLC25A13	7q21.3	0.136613	0.0038457	0.019097	Positively correlated
ARL15	5q11.2	0.136559	0.00385967	0.0191568	Positively correlated
NDFIP1	5q31.3	0.136549	0.00386242	0.0191657	Positively correlated
IFNLR1	1p36.11	0.136432	0.00389319	0.0192904	Positively correlated
SPOP	17q21.33	0.13641	0.00389904	0.0193016	Positively correlated
KLHL11	17q21.2	0.136403	0.00390089	0.019304	Positively correlated
[truncated: 18,034 more rows]
