# Supplementary material for: MAEL in human cancers and implications in prognostication and predicting benefit from immunotherapy over VEGFR/mTOR inhibitors in clear cell renal cell carcinoma: a bioinformatic analysis
Source: Aging (Albany NY). 2024 Jan 31;16(3):2090–122. doi: 10.18632/aging.205470 (PMC10911358; doi:10.18632/aging.205470)
Supplement: Supplementary Table 9 [file aging-16-205470-s008.xlsx]

## Sheet: Sheet1
Supplementary Table 9. Original IC50 and transformed IC50 of the 16 ccRCC cell lines.
Agent	Target	Original IC50																Geomean of IC50	lg(original IC50/geomean)
		RCC10RGB (0.000)	786O (0.000)	769P (0.000)	VMRCRCW (0.000)	A498 (0.014)	BFTC909 (0.029)	KMRC1 (0.029)	CAL54 (0.057)	VMRCRCZ (0.070)	CAKI1 (0.124)	OSRC2 (0.214)	A704 (0.390)	ACHN (0.433)	UO31 (0.536)	KMRC20 (0.696)	SW156 (0.740)		RCC10RGB (0.000)	786O (0.000)	769P (0.000)	VMRCRCW (0.000)	A498 (0.014)	BFTC909 (0.029)	KMRC1 (0.029)	CAL54 (0.057)	VMRCRCZ (0.070)	CAKI1 (0.124)	OSRC2 (0.214)	A704 (0.390)	ACHN (0.433)	UO31 (0.536)	KMRC20 (0.696)	SW156 (0.740)
5Z-7-Oxozeaenol	VEGFR	NA	2.15096	1.84279	NA	0.491685	0.893785	0.982947	1.09848	1.77128	2.40509	5.64236	2.58326	1.99716	0.60578	11.8638	4.09643	1.87955		0.0585781	-0.00857859		-0.582367	-0.322821	-0.281524	-0.233261	-0.025768	0.107078	0.477407	0.138115	0.0263591	-0.491739	0.800171	0.338352
Axitinib	VEGFR	109.862	NA	NA	5.72879	20.832	NA	9.39836	NA	7.86618	19.2354	9.2648	4.56107	13.0024	NA	16.4487	NA	13.2636	0.918185			-0.364599	0.196069		-0.14961		-0.226898	0.16144	-0.155826	-0.463595	-0.0086376		0.0934702
Cabozantinib	VEGFR	5.61846	8.3152	30.293	7.41419	152.73	30.8129	30.4072	4.74536	29.8299	15.4407	16.7038	9.80177	16.3754	8.58859	68.6947	17.2991	17.6637	-0.497464	-0.327209	0.234262	-0.377017	0.936843	0.241652	0.235895	-0.570812	0.22757	-0.0584133	-0.0242652	-0.255777	-0.0328894	-0.31316	0.589842	-0.00905705
Foretinib	VEGFR	6.27359	0.45797	0.67999	1.133	141.268	3.1168	1.56307	0.736794	1.05209	0.44915	0.721017	0.624499	0.921946	1.96849	2.15049	1.28454	1.55736	0.605128	-0.531551	-0.359886	-0.138157	1.95766	0.30132	0.0015912	-0.325042	-0.170336	-0.539997	-0.334442	-0.396856	-0.227683	0.101744	0.14015	-0.0836395
Linifanib	VEGFR	79.6568	4.42244	7.65458	11.4944	25.1078	10.4683	12.5456	12.3902	7.45491	15.8147	29.8202	14.1022	14.6538	9.94185	12.0135	10.6966	13.4706	0.771837	-0.483724	-0.245465	-0.0689008	0.270422	-0.109512	-0.0308952	-0.0363096	-0.256944	0.0696748	0.345124	0.0199016	0.0365642	-0.131919	-0.0497149	-0.10014
Motesanib	VEGFR	165.129	9.33729	NA	NA	77.1874	NA	36.3039	40.9966	41.8229	NA	11.3927	11.6199	NA	26.012	10.1905	NA	27.637	0.776334	-0.47127			0.446056		0.118463	0.171257	0.179923		-0.384863	-0.376289		-0.0263171	-0.433294
OSI-930	VEGFR	642.361	45.028	140.313	110.837	250.65	63.2219	74.8663	213.512	91.8685	369.712	293.511	100.662	109.061	83.2184	96.5149	92.7371	132.738	0.684783	-0.469514	0.0241002	-0.0783125	0.276071	-0.322129	-0.24871	0.206427	-0.15983	0.444867	0.344628	-0.120133	-0.0853255	-0.202777	-0.138402	-0.155743
Pazopanib	VEGFR	76.2167	9.2361	35.4795	10.7828	208.209	15.3637	11.3212	5.48043	87.3731	7.95601	11.8003	1.26993	9.77976	94.7509	21.825	113.801	20.856	0.562819	-0.353743	0.230745	-0.2865	0.999267	-0.132737	-0.265338	-0.580417	0.622146	-0.418536	-0.24734	-1.21545	-0.328903	0.657352	0.0197227	0.736914
Ponatinib	VEGFR	5.04274	0.304079	0.932468	2.64465	2.40043	3.32285	9.19974	1.19733	0.718781	0.390567	0.855411	1.14608	0.411487	2.78285	3.88924	1.60124	1.49932	0.526773	-0.692907	-0.206259	0.246474	0.204396	0.345618	0.787882	-0.097678	-0.319297	-0.584198	-0.243719	-0.116677	-0.561537	0.268597	0.413971	0.0285623
Sorafenib	VEGFR	143.503	NA	NA	NA	110.49	NA	NA	NA	NA	NA	7.09288	NA	NA	NA	NA	NA	48.269	0.473192				0.359654						-0.832846
Sunitinib	VEGFR	366.751	NA	NA	NA	348.482	NA	NA	NA	NA	NA	5.62087	12.2241	NA	NA	NA	NA	54.4368	0.828478				0.806288						-0.986089	-0.648677
Tivozanib	VEGFR	11.082	0.762513	1.0514	1.37621	5.53825	1.63931	2.33641	2.29199	2.66909	2.8345	3.3935	1.59294	1.85842	1.37144	2.14395	2.17075	2.19405	0.703373	-0.459	-0.319479	-0.202563	0.402126	-0.126586	0.027303	0.0189663	0.0851172	0.111229	0.189401	-0.139048	-0.0721035	-0.20407	-0.0100311	-0.00463588
A-443654	AKT	5.57125	NA	NA	NA	43.4582	NA	NA	NA	NA	NA	0.217462	0.176507	NA	NA	NA	NA	1.74599	0.50391				1.39603						-0.90466	-0.99528
GSK690693	AKT	1002.01	1.21239	49.5277	86.7542	171.699	132.222	185.982	208.686	96.7911	116.906	13.2957	132.058	61.2182	35.1236	180.402	23.9307	74.2219	1.13034	-1.78689	-0.175684	0.0677584	0.364237	0.250772	0.39894	0.448962	0.115303	0.197303	-0.746822	0.250233	-0.0836514	-0.324933	0.385708	-0.491577
MK-2206	AKT	54.6734	3.79379	NA	NA	8.74422	NA	9.92045	0.876234	3.86526	NA	1.42477	2.7179	NA	NA	8.23104	NA	4.99694	1.03907	-0.11963			0.243017		0.297828	-0.756084	-0.111525		-0.54496	-0.26447			0.216751
PI-103	PI3K/mTOR	7.80576	0.142947	0.4958	4.7562	383.72	12.8553	61.8866	54.9538	12.2722	2.88927	23.9605	140.962	1.54102	0.51375	178.339	30.0545	10.5179	-0.129514	-1.86676	-1.32662	-0.344669	1.56209	0.0871524	0.769667	0.718068	0.0669916	-0.561141	0.357566	1.12717	-0.834121	-1.31118	1.22932	0.45598
AZD8055	mTOR	2.86683	1.12642	NA	NA	7.11725	NA	3.9368	1.56357	1.00992	NA	1.15737	0.674284	NA	2.28323	1.98367	NA	1.8635	0.187072	-0.218629			0.581983		0.324814	-0.0762125	-0.266044		-0.206859	-0.441486		0.0882214	0.0271396
OSI-027	mTOR	11.7214	0.295794	0.930483	6.18153	17.2165	71.6284	22.1087	21.6157	0.323437	0.438488	3.68729	45.4991	9.20652	2.60289	82.7657	8.55834	6.19832	0.276704	-1.32128	-0.823565	-0.00117794	0.443672	1.06281	0.552289	0.542495	-1.28248	-1.15032	-0.225567	0.865729	0.171822	-0.376818	1.12558	0.140115
Rapamycin	mTOR	NA	NA	NA	NA	4.30373	NA	NA	NA	NA	NA	NA	0.157097	NA	NA	NA	NA	0.822255					0.718838							-0.718838
Temsirolimus	mTOR	4.12106	NA	NA	0.611976	0.203783	NA	0.0547222	NA	0.0938516	0.05936	0.0158704	0.164867	0.222213	NA	0.0655419	NA	0.150523	1.43741			0.609132	0.131565		-0.439438		-0.20516	-0.404108	-0.977014	0.0395314	0.169167		-0.361083
BX-912	PDK-1	995.384	13.3776	23.5011	58.4869	157.009	21.081	99.6445	13.9803	9.5161	259.026	50.1261	33.1404	21.5341	13.101	88.5313	67.984	47.1009	1.32496	-0.546652	-0.30194	0.0940294	0.522896	-0.349137	0.325425	-0.527513	-0.69457	0.740315	0.0270352	-0.152671	-0.339902	-0.555723	0.274068	0.159378
BX795	PDK-1	75.5078	5.25075	NA	NA	8.57065	NA	11.2943	27.2276	3.9682	NA	34.3523	4.21055	NA	12.4897	3.23511	NA	10.9255	0.83955	-0.318221			-0.105429		0.0144182	0.396567	-0.439849		0.497513	-0.414104		0.0581091	-0.528554
Pictilisib	PI3K	NA	5.08136	1.04397	NA	1.30193	1.06526	4.31101	0.584638	2.50986	1.62432	1.43498	1.25801	1.34726	0.704357	4.54481	9.25588	1.84872		0.439108	-0.248185		-0.152283	-0.239414	0.367708	-0.499985	0.132777	-0.056199	-0.110027	-0.167189	-0.137422	-0.419079	0.390644	0.699546
Idelalisib	PI3K	254.433	32.8876	70.2028	58.5364	340.621	233.365	213.934	90.5	22.7612	65.7675	16.7245	145.286	62.236	30.8477	232.303	32.168	79.9046	0.503002	-0.38554	-0.0562172	-0.135145	0.629699	0.465464	0.427708	0.054077	-0.545377	-0.0845602	-0.679219	0.259651	-0.10853	-0.413349	0.463483	-0.395147
PIK-93	PI3K	53.218	21.2287	21.543	39.6965	385.14	86.1003	29.5519	47.1249	21.126	37.2143	10.8962	26.3144	25.4471	25.7359	240.105	16.1818	38.7263	0.138052	-0.261083	-0.254701	0.0107458	0.997612	0.346998	-0.117421	0.0852442	-0.263189	-0.0172966	-0.550732	-0.167812	-0.182368	-0.177467	0.792395	-0.378979
TGX221	PI3K	9.04357	NA	NA	NA	0.500137	NA	NA	NA	NA	NA	1.16627	NA	NA	NA	NA	NA	1.74077	0.715598				-0.541653						-0.173944
YM201636	PI3K	31.7946	2.68639	4.70137	8.65695	153.018	14.3214	15.0348	5.80705	15.7789	16.1221	18.6477	8.07188	7.01464	5.99706	59.8181	12.5951	13.1579	0.383168	-0.690016	-0.446961	-0.181821	1.06556	0.036799	0.0579122	-0.35523	0.0788917	0.0882355	0.151439	-0.212211	-0.27318	-0.341247	0.657647	-0.0189831
ZSTK474	PI3K	26.7368	0.975018	1.07978	3.08792	8.86402	14.1371	32.0911	13.8722	1.05969	1.47684	0.691821	7.06294	2.54125	0.899433	37.7356	2.58567	4.16718	0.807267	-0.630829	-0.586509	-0.130176	0.327788	0.530517	0.886542	0.522304	-0.594663	-0.450508	-0.779848	0.229143	-0.214794	-0.665873	0.956909	-0.207269
Dactolisib	PI3K/mTOR	0.242017	0.031216	NA	NA	0.0868115	NA	0.0549672	0.140258	0.0222999	NA	0.0184734	0.0569849	NA	0.0859735	0.0451037	NA	0.0583851	0.617544	-0.271925			0.172275		-0.026198	0.380627	-0.417999		-0.499756	-0.0105421		0.168063	-0.112089
Omipalisib	PI3K/mTOR	0.629476	0.0422849	0.0457839	0.103831	0.805955	0.603759	1.54159	0.475601	0.0695675	0.0434322	0.0227897	0.859426	0.0857806	0.0348063	0.800192	0.0422354	0.163839	0.584562	-0.588232	-0.553704	-0.19809	0.691894	0.566446	0.973552	0.462826	-0.372011	-0.576605	-0.856678	0.719791	-0.281028	-0.67276	0.688777	-0.58874
AZD6482	PI3Kβ	1.28275	1.02361	9.19783	2.99633	0.15521	5.4247	2.20564	2.85529	0.206993	1.73194	0.576836	14.6581	13.9383	18.0417	53.5338	4.16674	2.94847	-0.361456	-0.459463	0.494088	0.00699168	-1.27868	0.264778	-0.126063	-0.013947	-1.15364	-0.231065	-0.708545	0.69648	0.674611	0.78668	1.25903	0.150199
AS605240	PI3Kγ	169.731	6.16493	2.11602	35.1416	140.996	110.864	74.5432	19.0084	42.1048	27.7804	186.42	102.716	23.218	26.1458	110.989	94.2105	44.5989	0.580436	-0.859396	-1.3238	-0.103503	0.499884	0.395466	0.223084	-0.370378	-0.0249925	-0.205586	0.621169	0.362313	-0.283499	-0.231923	0.395956	0.324775
PF-4708671	Ribosomal S6 Kinase	190.788	4.14196	NA	NA	95.0063	64.4731	38.9624	49.5369	21.8497	41.8777	112.071	NA	27.8773	20.0962	103.39	13.0306	40.2303	0.675998	-0.987347			0.373199	0.204825	-0.0139078	0.0903754	-0.265109	0.0174295	0.44494		-0.159303	-0.301438	0.409927	-0.48959
SL0101	Ribosomal S6 Kinase	508.824	49.0117	NA	NA	305.746	NA	92.2458	27.4075	169.018	NA	28.9346	136.24	NA	60.6892	40.297	NA	89.0653	0.756859	-0.259408			0.535652		0.0152383	-0.51184	0.278225		-0.488291	0.184596		-0.166597	-0.344435
